# $\beta$ -Cell Failure in Diabetes and Preservation by Clinical Treatment

Bernardo L. Wajchenberg

Endocrine Service and Diabetes and Heart Center of The Heart Institute, Hospital das Clinicas of The University of São Paulo Medical School, São Paulo, SP 05403-000, Brazil

There is a progressive deterioration in  $\beta$ -cell function and mass in type 2 diabetics. It was found that islet function was about 50% of normal at the time of diagnosis, and a reduction in  $\beta$ -cell mass of about 60% was shown at necropsy. The reduction of  $\beta$ -cell mass is attributable to accelerated apoptosis. The major factors for progressive loss of  $\beta$ -cell function and mass are glucotoxicity, lipotoxicity, proinflammatory cytokines, leptin, and islet cell amyloid. Impaired  $\beta$ -cell function and possibly  $\beta$ -cell mass appear to be reversible, particularly at early stages of the disease where the limiting threshold for reversibility of decreased  $\beta$ -cell mass has probably not been passed.

Among the interventions to preserve or “rejuvenate”  $\beta$ -cells, short-term intensive insulin therapy of newly diagnosed type 2 diabetes will improve  $\beta$ -cell function, usually leading to a temporary remission time. Another intervention is the induction of  $\beta$ -cell “rest” by selective activation of ATP-sensitive  $K^+$  ( $K_{ATP}$ ) channels, using drugs such as diazoxide.

A third type of intervention is the use of antiapoptotic drugs, such as the thiazolidinediones (TZDs), and incretin mimetics and enhancers, which have demonstrated significant clinical evidence of effects on human  $\beta$ -cell function.

The TZDs improve insulin secretory capacity, decrease  $\beta$ -cell apoptosis, and reduce islet cell amyloid with maintenance of neogenesis. The TZDs have indirect effects on  $\beta$ -cells by being insulin sensitizers. The direct effects are via peroxisome proliferator-activated receptor  $\gamma$  activation in pancreatic islets, with TZDs consistently improving basal  $\beta$ -cell function. These beneficial effects are sustained in some individuals with time. There are several trials on prevention of diabetes with TZDs.

Incretin hormones, which are released from the gastrointestinal tract in response to nutrient ingestion to enhance glucose-

dependent insulin secretion from the pancreas, aid the overall maintenance of glucose homeostasis through slowing of gastric emptying, inhibition of glucagon secretion, and control of body weight. From the two major incretins, glucagon-like peptide-1 (GLP-1) and glucose-dependent insulinotropic polypeptide (GIP), only the first one or its mimetics or enhancers can be used for treatment because the diabetic  $\beta$ -cell is resistant to GIP action. Because of the rapid inactivation of GLP-1 by dipeptidyl peptidase (DPP)-IV, several incretin analogs were developed: GLP-1 receptor agonists (incretin mimetics) exenatide (synthetic exendin-4) and liraglutide, by conjugation of GLP-1 to circulating albumin. The acute effect of GLP-1 and GLP-1 receptor agonists on  $\beta$ -cells is stimulation of glucose-dependent insulin release, followed by enhancement of insulin biosynthesis and stimulation of insulin gene transcription. The chronic action is stimulating  $\beta$ -cell proliferation, induction of islet neogenesis, and inhibition of  $\beta$ -cell apoptosis, thus promoting expansion of  $\beta$ -cell mass, as observed in rodent diabetes and in cultured  $\beta$ -cells. Exenatide and liraglutide enhanced postprandial  $\beta$ -cell function.

The inhibition of the activity of the DPP-IV enzyme enhances endogenous GLP-1 action *in vivo*, mediated not only by GLP-1 but also by other mediators. In preclinical studies, oral active DPP-IV inhibitors (sitagliptin and vildagliptin) also promoted  $\beta$ -cell proliferation, neogenesis, and inhibition of apoptosis in rodents. Meal tolerance tests showed improvement in postprandial  $\beta$ -cell function.

Obviously, it is difficult to estimate the protective effects of incretin mimetics and enhancers on  $\beta$ -cells in humans, and there is no clinical evidence that these drugs really have protective effects on  $\beta$ -cells. (*Endocrine Reviews* 28: 187–218, 2007)

## First Published Online March 12, 2007

Abbreviations: AGE, Advanced glycation end-product; AIR, acute insulin response;  $AIR_g$ , AIR to iv glucose; AUC, area under the curve; CoA, coenzyme A; CSII, continuous sc insulin infusion; DM2, type 2 diabetes mellitus; DPP-IV, dipeptidyl peptidase-IV; ER, endoplasmic reticulum; FA, fatty acid; FFA, free FA; FSIVGTT, frequently sampled iv glucose tolerance test; GLP, glucose-dependent insulinotropic polypeptide; GLP-1, glucagon-like peptide-1; GLP-1R, GLP-1 receptor; HbA1c, glycated hemoglobin; hIAPP, human IAPP; HOMA, homeostasis model assessment; HOMA- $\beta$ , HOMA of  $\beta$ -cell function; HOMA-IR, HOMA of insulin resistance; IAPP, islet amyloid polypeptide; IFG, impaired fasting glucose; IGT, impaired glucose tolerance; ISR, insulin secretion rate; NF- $\kappa$ B, nuclear factor  $\kappa$ B; PACAP, pituitary adenylate cyclase-activating peptide; PDX-1, pancreas duodenum homeobox-1; PI/IRI ratio, proinsulin to total immunoreactive insulin ratio; PPAR, peroxisome proliferator-activated receptor; ROS, reactive oxygen species;  $S_i$ , sensitivity index; TZD, thiazolidinedione; ZDF, Zucker diabetic fatty (rat).

*Endocrine Reviews* is published by The Endocrine Society (<http://www.endo-society.org>), the foremost professional society serving the endocrine community.

- I. Introduction
- II. Decline of  $\beta$ -Cell Function
  - A. Epidemiology
  - B. Pathophysiology
  - C. Decreased  $\beta$ -cell mass
- III. Factors for Progressive Loss of  $\beta$ -Cell Function and Mass
  - A. Glucotoxicity
  - B. Lipotoxicity
  - C. Proinflammatory cytokines and leptin
  - D. Islet cell amyloid
  - E. Linkage of reduced  $\beta$ -cell mass and dysfunction
- IV. Clinical Intervention to Preserve or “Rejuvenate”  $\beta$ -Cells
  - A. Short-term intensive insulin therapy of newly diagnosed DM2
  - B. Modulation of the  $\beta$ -cell ATP-sensitive  $K^+$  ( $K_{ATP}$ ) channel
  - C. Antiapoptotic drugs

## I. Introduction

IT IS WELL KNOWN that there is a progressive deterioration in  $\beta$ -cell function over time in type 2 diabetes mellitus (DM2), as indicated by the United Kingdom Prospective Diabetes Study (UKPDS) (1, 2), regardless of therapy allocation, albeit conventional (mainly diet), insulin, chlorpropamide, glibenclamide, or metformin treatment. Moreover, the pancreatic islet function was found to be about 50% of normal at the time of diagnosis, independent of the degree of insulin resistance, with the reduction in function probably commencing 10–12 yr before diagnosis and aggravated by increasing fasting plasma glucose levels (3). In the cited work (1–3), along with other studies, particularly those of Butler *et al.* (4) evaluating human pancreatic tissue from 124 autopsies in obese impaired fasting glucose (IFG), obese DM2, obese nondiabetic, lean DM2, and lean nondiabetic subjects, and observing a reduction in  $\beta$ -cell mass in impaired glucose tolerance (IGT) (40%) being greater still in DM2 (60%) compared with their respective nondiabetic control group, the underlying mechanism was found to be increased  $\beta$ -cell apoptosis, whereas new islet formation and  $\beta$ -cell replication (normalized to relative  $\beta$ -cell volume) remained normal or increased. Also, islet amyloid deposits were present in the majority of DM2 cases, compared with nondiabetic controls, but were not increased in obese IGT subjects. The role of declining  $\beta$ -cell mass and function in the development of DM2 has drawn attention to the need for agents that can address this process. Emerging evidence suggests that several medical therapies could offer specific benefits by preventing or delaying the decline in  $\beta$ -cell mass/function, thereby representing a substrate for early intervention efforts to lower the burden of DM2. Moreover, in individuals with established DM2, the inhibition of the increased apoptosis may lead to restoration of  $\beta$ -cell mass because islet neogenesis appeared to be unaffected.

## II. Decline of $\beta$ -Cell Function

### A. Epidemiology

As outlined above,  $\beta$ -cell function has been shown by the UKPDS (1–3) to be low at diagnosis and to decline, associated with a deterioration in glycemic control, with increasing duration of diabetes, notwithstanding the use of a number of therapies existing at the time the study was performed. Moreover, the importance of maintaining adequate  $\beta$ -cell function to offset the need for combination therapy is clearly demonstrated in the UKPDS findings; after 6 yr of sulfonylurea monotherapy, 62% of patients with baseline  $\beta$ -cell function [updated homeostasis model assessment (HOMA 2); Ref. 5] below 27% (in relation to a reference group of normoglycemic subjects aged 18–25 yr) required additional therapy to maintain glycemic targets. In contrast, only 28% of those patients with  $\beta$ -cell function above 55% required additional therapy (6, 7). The Skaraborg Hypertension and Diabetes Project, a Swedish community-based follow-up of 376 primary care patients with DM2, found glycated hemoglobin (HbA1c) levels to increase over time in association with a corresponding decline in  $\beta$ -cell function (8). An

HbA1c level of 6.5% or higher was associated with impairment of  $\beta$ -cell function (HOMA) (9) and longer duration of diabetes, irrespective of age and gender. These associations are likely to be causal because  $\beta$ -cell function in DM2 is diminished, as indicated previously and discussed below.

### B. Pathophysiology

Insulin resistance and impaired insulin secretion are usually present in patients with classical DM2 as well as in most individuals with IGT. The relative contributions of impaired  $\beta$ -cell function and insulin sensitivity in DM2 have been controversial, especially over what constitutes the primary genetic defect. Current evidence points to  $\beta$ -cell dysfunction as the first demonstrable defect with limited capacity to compensate for the presence of insulin resistance. However, the modulating effect of insulin sensitivity on  $\beta$ -cell function has to be considered for the assessment of insulin release in individuals at risk of developing DM2. The nature of this relationship is such that insulin sensitivity and  $\beta$ -cell function are inversely and proportionally related, whereby the product of these two parameters is constant, being referred to as the disposition index (10), and in turn can be interpreted as a measure of the ability of the  $\beta$ -cells to compensate for insulin resistance. Mathematically, this relationship is described by the hyperbolic relationship between the acute insulin response (AIR) and the metabolic action of insulin to stimulate glucose disposal (M) and is referred to as glucose homeostasis, with glucose concentration assumed to remain constant along the hyperbola. According to Stumvoll *et al.* (11), because glucose is one of the signals stimulating AIR in response to decreasing M, hypothetically, as with any normally functioning feed-forward system, AIR should not fully compensate for worsening M, since this would remove the stimulus for compensation. Evidence was provided from cross-sectional, longitudinal, and prospective data on Pima Indians (n = 413) and Caucasians (n = 60), demonstrating that fasting and postprandial glucose concentrations increase with decreasing M despite normal compensation of AIR. To denote this physiological adaptation to chronic stress (insulin resistance), Stumvoll *et al.* (11) have proposed the term “glucose allostasis.” Allostasis (stability through change) would ensure continued homeostatic response (stability through remaining the same) to acute stress at some cumulative costs to the system. With increasing severity and over time, the allostatic load (increase in glycemia), while increasing the burden that persistent increases in insulin secretion place on the  $\beta$ -cell and perhaps other parts of the system, may have pathological consequences, such as the development of DM2. However, not all insulin-resistant subjects develop this disease where, in approximately 80% of cases, increased insulin secretion is sufficient to offset overt hyperglycemia (12). Nevertheless, in some individuals, failure of the  $\beta$ -cell to maintain adequate supplies of insulin triggers the development of DM2. Prospective studies (average follow-up of 7 yr) in Pima Indians, a very high-risk population for developing DM2, have shown that impaired  $\beta$ -cell function, as assessed by AIR to glucose (AIR<sub>g</sub>), was a predictor of developing diabetes, independent of obesity and insulin resistance (prevalent in this population), evaluated by the hyperinsu-

linemic glucose clamp (13). In a longitudinal study of 48 Pima Indians with normal glucose tolerance followed for an average of 5 yr with multiple measurements performed during this period, 17 of these individuals progressed from normal glucose tolerance through IGT to diabetes and insulin secretion declined progressively by 78%, whereas insulin sensitivity declined by 14%, associated with an increase in mean body weight from 93.7 to 106.9 kg. In the remaining 31 individuals who did not develop diabetes, a similar 11% decrease in insulin sensitivity was associated with a 30% increase in insulin secretion. At baseline, however, when all subjects had normal glucose tolerance, those individuals who subsequently progressed to diabetes had  $\beta$ -cell function markedly decreased for their degree of insulin resistance compared with those subjects who did not progress over time (14). From this and other studies, some of them previously reviewed, substantial evidence has accumulated showing that deterioration in  $\beta$ -cell function typically precedes hyperglycemia and has an important influence on its course. Furthermore, most of the available evidence supports the view that DM2 is a heterogeneous disorder in which the major genetic factor is impaired  $\beta$ -cell function, whereas insulin resistance is the major acquired factor at least in Caucasian populations. However, this may differ in a high-risk non-Caucasian population with severe genetic predisposition to insulin resistance, *e.g.*, Indians (15). Compelling evidence that impaired insulin secretion is the major genetic trait has been provided via the assessment of the degree of  $\beta$ -cell compensation to reduced insulin sensitivity among normal glucose-tolerant offspring or siblings of Caucasian familial DM2 kindreds (*i.e.*, families with at least two siblings diagnosed with DM2 before age 65 yr) (16, 17). In effect, glucose-tolerant members of Caucasian familial DM2 kindreds (but not similar obese control subjects) exhibit impairment in  $\beta$ -cell compensation for obesity-related insulin resistance. Furthermore, the heritability of insulin secretion is 67% (16).

The demonstration of  $\beta$ -cell dysfunction before the onset of DM2 and the recognition of the confounding effect of obesity on insulin sensitivity cast doubt on the theory that insulin resistance is the primary cause of DM2 (15). Several studies of the insulin-secretory capacity of glucose-tolerant individuals with a predisposing ethnicity or a family history of DM2 have indicated that  $\beta$ -cell dysfunction, like insulin resistance, occurs in genetically predisposed individuals with normal glucose tolerance, well before the emergence of overt diabetes (see references cited in Ref. 15). Of note in these studies is the fact that there were no significant differences with respect to insulin sensitivity between the predisposed subjects and the control groups (glucose-tolerant subjects with no family history of DM2), suggesting that alterations in insulin secretion precede insulin resistance in patients at risk for developing DM2.

Considering that the vast majority (85–90%) of DM2 patients are obese and that intraabdominal obesity, being the major determinant of insulin resistance (not only in obese individuals but also in apparently nonobese individuals who have evidence of increased abdominal fat) represents a significant genetic component (18), then insulin resistance occurring as a result of this could be considered genetic. Nev-

ertheless, most obese individuals who are insulin resistant are not diabetic and what distinguishes them from those who are diabetic is, as indicated previously, the ability of their pancreatic  $\beta$ -cells to compensate for insulin resistance. Although insulin resistance may be critical for the development of diabetes, irreversibly impaired insulin secretion plays, as expected, an essential role in diabetes persistence after weight loss and restoration to normal or near-normal insulin sensitivity (19).

Regarding the 10–15% of patients with DM2 who are not obese, whether they become diabetic depends on the balance between the severity of insulin resistance and the ability of the  $\beta$ -cell to compensate for the insulin resistance, as in the case of obese individuals. A spectrum could exist; at one extreme, the nonobese individual may be insulin resistant before or after the development of diabetes. High-fat diet, decreased physical fitness, increase in visceral fat, smoking, pregnancy, certain medications, and hyperglycemia itself (glucose toxicity) can all cause insulin resistance. At the other extreme of the spectrum, insulin resistance is absent, and the immediate cause of diabetes is then impaired insulin secretion. Only a minority of DM2 patients belong to this group, such as those with maturity-onset diabetes of the young and nonobese blacks and Swedes. There are no well-documented cases in which impaired insulin secretion is absent and insulin resistance is the immediate cause of DM2 (20).

The defect of insulin secretion in DM2 is related to two confounding components: insulin deficiency and disturbed kinetics of secretion combined with impaired glucose stimulus-secretion coupling (21).

**1. Insulin deficiency.** Insulin deficiency in DM2 is relative to the prevailing hyperglycemia and its measurement (immunoreactive or “true” insulin), at least in the early stages of the disease where these could show normal or increased values. However, because this level of insulin is insufficient to control the prevailing hyperglycemia, it would indicate that “insulin deficiency” is more evident when “true” insulin is measured. Besides, DM2 is characterized by an increased fasting ratio of proinsulin [long-chain precursor of insulin which is processed in the  $\beta$ -cell to produce equimolar quantities of mature (“true”) insulin and C-peptide] to total immunoreactive insulin (reflecting all immunoreactive species including proinsulin and conversion intermediates) (PI/IRI) indicating a reduced processing of proinsulin, which correlates with  $\beta$ -cell dysfunction and is predictive of disease development (22). From the observed significant negative correlation between fasting PI/IRI ratio and the acute maximal insulin responses to arginine and glucose in DM2, it has been proposed that the PI/IRI ratio, a relatively easy parameter to obtain, indicates a reduced  $\beta$ -cell capacity in patients with DM2 (23).

The determination of insulin in fasting plasma samples has the caveat that in this situation the demand for insulin is at its lowest. Only after stimulation does the magnitude of the insulin deficiency become fully manifested.

**2.  $\beta$ -Cell secretory defect.** It is well recognized that the relatively selective loss of glucose stimulation manifested by the lack of the first phase of secretion and decreased second



phase (24) in DM2 patients as well in subjects with IGT, demonstrates multiple abnormalities in both qualitative and quantitative measures of insulin secretion. Prandial insulin release after an oral glucose load or mixed meal is also delayed (25), permitting the elevated postprandial glucose concentrations characteristic of these individuals, despite relatively normal fasting glucose levels in IGT (26). Sensitivity to nonmetabolizable stimuli such as arginine remains normal, although the magnitude of glucose-dependence of the insulin response may be attenuated. Baseline insulin secretion is normally pulsatile, with a periodicity of 5 to 10 min. The defective release of insulin in DM2 involves reduced diurnal oscillations (27), impaired ultradian oscillations (28), and their reduced entrainment (29) as well as impaired rapid pulsatile secretion (30). The hypothesis of impaired insulin oscillations as a primary  $\beta$ -cell defect in DM2 was supported by the observation of defective oscillatory insulin release in first-degree relatives of such patients (31). However, Ritzel *et al.* (32) observed that the parameters of pulsatile insulin secretion were similar in normal subjects and DM2 and IGT subjects by deconvolution, spectral, and autocorrelation analysis and approximate entropy. This could also partly account for some of the insulin resistance in a number of studies showing that equal amounts of insulin presented to target organs have improved action when delivered in a pulsatile manner (see references cited in Ref. 33). These defects of secretion, particularly the lack of response to glucose, acting in concert with the insulin deficiency along with disproportionate amounts of proinsulin, compromise the ability of residual  $\beta$ -cells to provide sufficient insulin to achieve euglycemia in the presence of insulin resistance or otherwise.

### C. Decreased $\beta$ -cell mass

Insights into changes that occur in the  $\beta$ -cells have been gained mainly from diabetic animal models that support reduced  $\beta$ -cell mass as a significant contributory factor to diminished insulin secretion in DM2. Many of the signals that regulate the balance of replication of the existing cells/neogenesis from stem cells and cell death through necrosis or apoptosis and thus determine net  $\beta$ -cell mass have been identified, but it is less clear which of these factors contribute to the failure of  $\beta$ -cell mass augmentation. Obviously, diminished proliferation or increased apoptosis or both will result in lower  $\beta$ -cell mass. There is evidence that increased  $\beta$ -cell apoptosis in the Zucker diabetic fatty rat (ZDF), an animal model of DM2, underlies the decreased  $\beta$ -cell mass seen in these animals (34). Autopsy data examining  $\beta$ -cell mass in obese and diabetic humans have been sparse and sometimes contradictory. It is difficult to distinguish between the two mechanisms, cell formation and cell death, in human tissue sections mainly because dead cells are removed rapidly from the islet by macrophages and neighboring cells, making it hard to quantify cell death. Although cell proliferation can be quantified in tissue sections using markers, this only provides a single snapshot in time that probably does not reflect accurately the complex dynamic of the process (21). Recently, the study by Butler *et al.* (4), as mentioned in Section I, showed relative  $\beta$ -cell volume to be increased by 50% in obese compared with lean nondiabetic

pancreas and was attributed to increased neogenesis of islets from exocrine ductal tissue. Relative  $\beta$ -cell volume was decreased in obese IGT and more in obese DM2 compared with nondiabetic controls, being attributable to accelerated cell apoptosis. Other studies (35, 36) have also shown a reduction in  $\beta$ -cell mass in DM2, leading to a rapid emphasis of this etiological factor.

Potential mechanisms of  $\beta$ -cell adaptation can be summarized as follows (37): 1) functional up- and down-regulation of secretory machinery; 2)  $\beta$ -cell recruitment; 3)  $\beta$ -cell turnover and islet mass changes [evidence mainly from rodent work: increasing/decreasing cell size;  $\beta$ -cell turnover; *de novo* differentiation (neogenesis) of  $\beta$ -cells within islets and new islets budding from exocrine acinar cell pancreas; and  $\beta$ -cell death by necrosis *vs.* apoptosis (programmed  $\beta$ -cell death)].

Opinions diverge regarding the relative contribution of a decrease in cell mass *vs.* an intrinsic defect in the secretory machinery. A decrease in  $\beta$ -cell mass is likely to play a role in the pathogenesis of human DM2 as it does in rodent models of the disease, as indicated above. However, in contrast with type 1 diabetes, which has  $\beta$ -cell mass reduction of 70–80% at the time of diagnosis, DM2 initial pathological studies suggested  $\beta$ -cell loss of 25–50% (38, 39), although this has been disputed by others (40). Because  $\beta$ -cells cannot be measured *in vivo*, it remains unclear whether DM2 has a lower  $\beta$ -cell mass early in life, has failed to increase  $\beta$ -cell mass in the face of a given insulin resistance, or has a progressive  $\beta$ -cell loss as suggested by epidemiological evidence (1–3). Moreover, the secretion defect is probably more severe than could be accounted for solely by the reduction in  $\beta$ -cell mass in DM2 (41). Based on results obtained in rodent models of the disease and cultured rodent and human islets, it seems reasonable to assume that dyslipidemia and hyperglycemia negatively affect  $\beta$ -cell mass by increasing  $\beta$ -cell apoptosis in human DM2 (21, 42). Section III discusses recent hypotheses on the mechanisms of glucotoxicity and lipotoxicity besides other factors for progressive loss of  $\beta$ -cell function and mass.

**Summary/conclusions.** There is a progressive deterioration in  $\beta$ -cell function over time in DM2, independent of the type of treatment, where pancreatic islet function has been found to be about 50% of normal at the time of diagnosis, regardless of the degree of insulin resistance, as indicated by the UK-PDS. The decline of  $\beta$ -cell function, the first demonstrable defect, is the limited capacity to compensate for the presence of insulin resistance, both usually present in classical DM2 as well as in most individuals with IGT. Most of the evidence supports the view that DM2 is a heterogeneous disorder in which the major genetic factor is impaired  $\beta$ -cell function where insulin resistance would be the major acquired factor at least in Caucasians. The defect of insulin secretion in DM2 is related to two confounding components: insulin deficiency and  $\beta$ -cell secretory defect. On the other hand, there is an impaired glucose sensing in the  $\alpha$ -cells leading to hyperglucagonemia.

The reduction of  $\beta$ -cell mass is attributable to accelerated apoptosis. Regarding the relative contribution of a decrease in cell mass *vs.* an intrinsic defect in the secretory machinery, the latter is probably more severe than could be accounted for by the reduction in  $\beta$ -cell mass in DM2.

### III. Factors for Progressive Loss of $\beta$ -Cell Function and Mass

#### A. Glucotoxicity

Because glucose is the key physiological regulator of insulin secretion, it appears logical that it also regulates the long-term adaptation of insulin production by regulating  $\beta$ -cell turnover. However, it is important to stress that in human and *Psammomys obesus*  $\beta$ -cells *in vitro*, graded increase in glucose from a physiological concentration of 5.6 to 11.2 mmol/liter and above induces apoptosis (43, 44), whereas in rat islets the same graded glucose increment decreases apoptosis (45), indicating that glucose affects survival of islets differently in both species, which has led to some confusion in the field. This difference in glucose sensitivity between *P. obesus* and rat islets highlights the importance of genetic backgrounds. In effect, although glucose was capable of inducing  $\beta$ -cell apoptosis in most batches of human islets studied by Donath *et al.* (21, 46), striking variations were observed in the magnitude of this response. All this points to a limitation in most studies performed in cell lines and rodent and human islets. Glucotoxicity of the islets can be defined as nonphysiological and potentially irreversible  $\beta$ -cell damage caused by chronic exposure to supra-physiological glucose concentrations along with the characteristic decreases in insulin synthesis and secretion caused by decreased insulin gene expression (47). In this context it is important to consider the possible detrimental effect on  $\beta$ -cell turnover of transient postprandial glycemic excursions early in the development of overt diabetes. This could perhaps underlie the decrease in  $\beta$ -cell mass documented in patients with IGT, the earliest manifest stage of DM2 (4).  $\beta$ -Cell exhaustion, according to Robertson *et al.* (47), refers to a physical depletion of  $\beta$ -cell insulin stores secondary to prolonged chronic stimulation with glucose or nonglucose secretagogues, so that insulin secretion is not possible, even if the  $\beta$ -cell were to become resensitized to glucose. An important distinction between  $\beta$ -cell exhaustion and glucose toxicity is that the exhausted islet has no defect in insulin synthesis, and therefore cell function fully recovers as it rests. Glucose toxicity, on the other hand, implies the gradual, time-dependent establishment of irreversible damage to cellular components of insulin production and consequently to insulin content and secretion (47).

The fact that glucose induces apoptosis in  $\beta$ -cells is probably linked to the relative specificity of this toxicity toward the  $\beta$ -cell but not to other islet or most nonislet cell types. The  $\beta$ -cell is extremely sensitive to small changes in ambient glucose. When these changes are of short duration and lie within the physiological range, such as after a meal, they lead to insulin secretion. When of longer duration and more pronounced in magnitude, perhaps they are translated by the  $\beta$ -cell glucose-sensing pathways into proapoptotic signals (21). One such signal might be endoplasmic reticulum (ER) stress triggered by an increase in insulin biosynthesis (48) leading to increased insulin secretion as well as increased proinsulin biosynthesis to replenish  $\beta$ -cell insulin stores. The increase in proinsulin biosynthesis in turn causes an increased flux of protein through the ER of the  $\beta$ -cell, which is

quite high compared with other cell types even under physiological conditions, and any further increase is expected to be conducive to ER stress. Furthermore, chronic hyperglycemia could also lead to long-term increases in cytosolic  $\text{Ca}^{2+}$  [as opposed to the normal short-term increases arising from glucose-induced closure of ATP-dependent potassium channels ( $\text{K}_{\text{ATP}}$ )] that could in turn be proapoptotic (49).

Long-term hyperglycemia also induces the generation of reactive oxygen species (ROS) leading to chronic oxidative stress because the islets express very low levels of antioxidant enzymes and activity. ROS, particularly hydroxyl radicals, interfere with normal processing PDX-1 (pancreas duodenum homeobox-1) mRNA, a necessary transcription factor for insulin gene expression and glucose-induced insulin secretion besides being a critical regulator of  $\beta$ -cell survival (47, 46). The generation of ROS (and reactive nitrogen species) will ultimately activate stress-induced pathways [nuclear factor  $\kappa\text{B}$  (NF- $\kappa\text{B}$ ), stress kinases, and hexosamines] to manipulate cell fate (50–52). Del Guerra *et al.* (53), studying islets isolated from the pancreata of 13 DM2 patients (age ranging from 49 to 75 yr, and diabetes duration from 2 to 8 yr, except one patient with 23-yr known duration of the disease) and 13 matched nondiabetic cadaveric organ donors, demonstrated several functional and molecular defects, confirming that DM2 islets release less insulin than control islets accompanied by altered expression of glucotransporters and of glucokinase, reduced activation of AMP-activated protein kinase and alterations in some transcription factors regulating  $\beta$ -cell differentiation and function. Markers of oxidative stress, such as nitrotyrosine and 8-hydroxy-2'-deoxyguanosine concentrations, were significantly higher in DM2 than control islets and correlated with the degree of glucose-stimulated insulin release impairment. The addition of glutathione in the incubation medium determined reduction of oxidative stress (as suggested by diminished levels of nitrotyrosine), improved glucose-stimulated insulin secretion, and increased insulin mRNA expression. Thus, Del Guerra *et al.* (53) concluded that the functional impairment of DM2 islets could be, at least in part, reversible by reducing islet cell oxidative stress. It is important to emphasize that in this study the percentage of  $\beta$ -cells was only slightly ( $\sim 10\%$ ), although significantly, reduced in diabetic islets compared with control islets. As reasoned by Robertson *et al.* (47), if the steady decline in  $\beta$ -cell function in DM2 is attributable to any significant extent to ongoing apoptosis via chronic oxidative stress with no deterioration in  $\beta$ -cell replication, then interference with apoptosis by antioxidants or any other therapy, might provide a much needed new approach to conventional treatment that could stabilize  $\beta$ -cell mass.

#### B. Lipotoxicity

Diabetes is associated with dyslipidemia characterized by an increase in circulating free fatty acids (FFAs) and changes in lipoprotein profile. In healthy humans, besides the hyperinsulinemia induced by an acute elevation of FFAs, there is also an increase in glucose-stimulated insulin secretion after prolonged FFA infusion (48 and 96 h) (54, 55) but not in nondiabetic individuals genetically predisposed to developing DM2 (55). In healthy control subjects, the FFA-induced

insulin resistance was compensated by the enhanced insulin secretion, whereas persistently elevated FFAs may contribute to progressive  $\beta$ -cell failure ( $\beta$ -cell lipotoxicity) in individuals genetically predisposed to DM2. Santomauro *et al.* (56) have demonstrated that overnight administration of the nicotinic acid analog acipimox lowered plasma FFA as well as fasting insulin and glucose levels, reduced insulin resistance, and improved oral glucose tolerance with decreased insulin levels in lean and obese nondiabetic subjects and in subjects with IGT and DM2. The significant decrease in insulin levels suggested that plasma FFA support between 30 and 50% of basal insulin levels. A sustained (7-d) reduction in plasma FFA concentrations in DM2, with acipimox, was also associated with enhanced insulin-stimulated glucose disposal (reduced insulin resistance) associated with a decreased content of intramyocellular long-chain fatty acids (FAs) and improvement in oral glucose tolerance test with a slight decrease in mean plasma insulin levels (57). These data suggest that physiological increases in plasma FFA concentrations in humans potentiate glucose-stimulated insulin secretion and are unlikely to be “lipotoxic” to  $\beta$ -cells (58) but may contribute to progressive  $\beta$ -cell failure in at least some individuals who are genetically predisposed to developing DM2 (55). For all studies reported in relation to the FFA- $\beta$ -cell interaction it is important to emphasize that the stimulatory effects on glucose-stimulated insulin secretion are physiological in nature, particularly during the fasted-to-fed transition. Circulating FFAs help maintain a basal rate of insulin secretion, keeping adipose tissue lipolysis in check.

In rodent islets, increased FFAs have been shown to be proapoptotic in  $\beta$ -cells (59). Exposure of cultured human islets to saturated FAs such as palmitate are highly toxic to the  $\beta$ -cell, inducing  $\beta$ -cell apoptosis, decreased  $\beta$ -cell proliferation, and impaired  $\beta$ -cell function. In contrast, the monounsaturated FAs such as oleate are protective against both palmitate and glucose-induced apoptosis and increase in proliferation. The deleterious effect of palmitic acid was mediated via ceramide-mitochondrial apoptotic pathways, whereas induction of the mitochondrial protein Bcl-2 by oleic acid may contribute to the protective effect of monounsaturated FAs, such as palmitoleic or oleic acids (60).

A similar balance between pro- and antiapoptotic effects is found for lipoprotein action on insulin-secreting cells from mouse pancreatic islets. The sole available study testing the hypothesis that lipoproteins modulate the function and survival of the cells has demonstrated that purified human very low-density lipoprotein and low-density lipoprotein particles reduced insulin mRNA levels and  $\beta$ -cell proliferation and were proapoptotic, whereas high-density lipoprotein protected  $\beta$ -cells against these proapoptotic effects. The protective effects of high-density lipoprotein were mediated, partially at least, by inhibition of caspase-3 cleavage and activation of Akt/protein kinase B, whereas proapoptotic lipoproteins seem to act via c-Jun N-terminal kinase (61). These results are highly suggestive that the changes in lipoprotein profile observed in DM2 could contribute to the pathogenesis and progression of  $\beta$ -cell failure.

Regarding the mechanism(s) by which lipotoxicity can impair  $\beta$ -cell function, the emerging evidence has suggested that long-chain fatty acyl-coenzyme A (CoA) might be in-

volved in the  $\beta$ -cell dysfunction that occurs after prolonged exposure to FFAs, mediating its deleterious effects, at least in rodents, as initially proposed by Prentki and Corkey (62) and recently reviewed by Yaney and Corkey (63). According to these authors, the simultaneous presence of elevated glucose and FA results from glucose as an oxidative fuel, in accumulation of cytosolic citrate, the precursor of malonyl-CoA, which in turn inhibits carnitine-palmitoyl-transferase-1, the enzyme responsible for transport of FA into the mitochondria, blocking their oxidation and energy production, resulting in cytosolic accumulation of long-chain fatty acyl-CoAs. Thus, this model proposes that glucose concentration plays a critical role in the effect of FAs. Whether long-chain acyl-CoA accumulation directly affects  $\beta$ -cell function or whether it serves as a precursor for other active molecules such as diacylglycerols or phospholipids directly activating protein kinase C isoforms somehow synergizing with glucose to enhance insulin secretion was not characterized, whereas the nature of the effectors downstream of lipid metabolite accumulation remains unknown (62–64).

As reported by Poitout and Robertson (64), the “malonyl-CoA/long chain-acyl-CoA” proposed as a biochemical basis for lipotoxicity implies that the effects of FA are greatly influenced by concomitant glucose concentration. Therefore, in the presence of physiological glucose concentrations, elevated FA should be readily oxidized in the mitochondrion and should not harm the  $\beta$ -cell. Under circumstances in which both FA and glucose are elevated, accumulation of metabolites derived from FA esterification would inhibit glucose-induced insulin secretion and insulin gene expression. Thus, glucotoxicity and lipotoxicity are closely interrelated, in the sense that lipotoxicity does not exist without chronic hyperglycemia. Furthermore, the effects of glucose on lipid metabolism are so intense that according to Poitout and Robertson (64), lipotoxicity can be viewed as one mechanism of glucotoxicity. Hence, generation of ROS may be an alternative mechanism of both gluco- and lipotoxicity. In effect, exposure of islets to palmitate induces generation of ROS (65) and treatment of islets with metformin, which has antioxidant properties, protecting them from deleterious effects of FAs (66).

### C. Proinflammatory cytokines and leptin

The chronic increase in inflammatory mediators observed in DM2 might not only affect insulin-sensitive tissues and blood vessel walls but could also affect pancreatic  $\beta$ -cells. In addition to genetic factors, development of DM2, with a central role for the functional  $\beta$ -cell mass, is strongly influenced by environmental factors, including decreased physical activity, nutrition, and obesity. This promotes the following factors, which are possible mediators of an inflammatory process (67).

**1. Adipocyte-secreted factors.** Locally produced hormones and cytokines possess important auto/paracrine properties. Some are also released into circulation and have endocrine effects. In particular, leptin, TNF- $\alpha$ , IL-6, and IL-1 receptor antagonist are produced and secreted by fat tissue, being increased in obesity, and have been causally linked to insulin resistance (18, 68).



Leptin is expressed primarily in adipose tissue, representing the most obvious exponent of the adipocyte. Recently, leptin has also been considered as a proinflammatory cytokine because of its structural similarity with other cytokines and its receptor-induced signaling pathways (69). In rodent islets, leptin induces  $\beta$ -cell proliferation and protects from FFA-induced  $\beta$ -cell apoptosis. In contrast, chronic exposure of human islets to leptin leads to  $\beta$ -cell apoptosis via increasing release of IL-1 $\beta$  and decreasing release of IL-1 receptor antagonist in the islets (70). Other cytokines released by adipocytes, including TNF- $\alpha$  and IL-6, may also modulate  $\beta$ -cell survival, although it is unclear whether the amount released into the circulation is sufficient to affect  $\beta$ -cells (70). Furthermore, it may well be that these cytokines are only effective in the presence of other cytokines.

**2. Increased cell nutrients.** Elevated glucose concentrations and FFAs, in addition to their role of cell nutrients, also have a dual effect on  $\beta$ -cell turnover. Depending on duration of exposure to glucose or FFA and on the genetic background of the islets, glucose and FFAs may induce  $\beta$ -cell proliferation and have pro- or antiapoptotic effects. According to Maedler *et al.* (50), elevated glucose concentrations induce  $\beta$ -cell production of IL-1 $\beta$  leading to  $\beta$ -cell apoptosis. Furthermore, chronic hyperglycemia increases production of ROS, which may cause oxidative damage in  $\beta$ -cells, as highlighted previously. Both IL-1 $\beta$  and ROS activate the transcription of the NF- $\kappa$ B, which plays a critical role in mediating inflammatory responses. On the other hand, increased concentrations of FFAs, particularly saturated, may affect the viability of the  $\beta$ -cells directly, as discussed earlier, or via obesity, *i.e.*, adipocyte-secreted cytokines (TNF- $\alpha$ , IL-6, and leptin) may act directly on the  $\beta$ -cells or activate the innate immune system.

**3. Innate immune system and autoimmunity.** The innate immune system is considered to provide rapid host defenses until the slower adaptive immune response develops. In addition to the endocrine activity of the adipocytes, described above, macrophages and endothelium may contribute to increasing serum levels of IL-1 $\beta$ , IL-6, and TNF- $\alpha$  in DM2 (71) and may act on the pancreatic islets and impair  $\beta$ -cell secretory function or activate the innate immune system (67). Similarly, these cytokines induce the liver to produce acute-phase proteins such as C-reactive protein, haptoglobin, fibrinogen, plasminogen activator inhibitor, and serum amyloid A.

As indicated by Donath *et al.* (67), when apoptotic cells are present in high enough numbers or when apoptosis is the consequence of exposure to cytokines such as IL-1 $\beta$  and TNF- $\alpha$ , they can provoke an immune response. Moreover, pronounced activation of the acute-phase response is associated with islet cell autoantibodies in patients with DM2 (72). After glucose and FFA-induced  $\beta$ -cell apoptosis, it is conceivable that depending on age and on genetic and/or environmental factors, some DM2 patients may show mobilization of T cells reactive to  $\beta$ -cell antigens, culminating in autoimmune destruction of  $\beta$ -cells similar to that observed during earlier stages in “classical” type 1 diabetes (21). This response may be so discrete and desynchronized in time and

space that it has evaded detection in earlier autopsy studies. The precise role of the innate and acquired immune system in the ongoing process of  $\beta$ -cell demise in DM2 remains to be investigated.

#### D. Islet cell amyloid

The relevance of amyloid deposition in the deterioration of  $\beta$ -cell function has been the subject of debate for many years. As indicated in *Section I*, deposits composed mainly of islet amyloid polypeptide (IAPP), also known as amylin, have been reported in up to 90% of DM2 individuals, compared with 10–13% of nondiabetic counterparts (4). IAPP is a 37-amino acid,  $\beta$ -cell peptide that is costored and coreleased with insulin in response to  $\beta$ -cell secretagogues. The normally soluble peptide is found in the circulation at 5–15 pmol/liter concentration in man, and like C-peptide (but not insulin) it is excreted by the kidney; the relationship of circulating insulin-like molecules to IAPP would therefore be more accurate with C-peptide than insulin (73).

Several bodies of evidence support a potential role of IAPP in the pathophysiology of  $\beta$ -cell loss in DM2. In effect, spontaneous DM2 occurring in humans, monkeys, and cats shares close homology in IAPP sequence, which spontaneously forms amyloid fibrils in an aqueous environment. Nevertheless, proline substitutions in the region IAPP 24–29 that does not form fibrils in an aqueous solution, as found in rats and mice, do not spontaneously develop DM2 but instead require selective genetic manipulation to develop diabetes (see reference citations in Ref. 73). Transgenic mice expressing human IAPP (hIAPP) in  $\beta$ -cells when obese, spontaneously develop diabetes characterized by islet amyloid and decreased  $\beta$ -cell mass (74). Prospective studies in these mice support the hypothesis that the mechanism of the decreased  $\beta$ -cell mass is increased apoptosis (75). It has been suggested that fibril size of IAPP may determine the capacity of amyloid to cause cell death and that intermediate-sized oligomeric material is chiefly responsible for  $\beta$ -cell toxicity. Exposure of mouse islets to intermediate-sized aggregates of hIAPP caused disruption and vesiculation of cell membranes after 24 h, and both necrotic and apoptotic cells were evident after 48 h. These particles were more cytotoxic to mouse islet cells than matured particles containing large aggregates (76). The findings from the Mayo Clinic that only a minority (about 10%) of the cases with IFG had islet amyloid (evaluated in slides stained by Congo red and examined under polarized light for birefringence) present, while already having a deficit in presumptive  $\beta$ -cell mass of approximately 40%, is consistent with the suggestion that small IAPP oligomers (not detectable by light microscopy) are the cause of  $\beta$ -cell loss, whereas the large extracellular amyloid deposits visible by light microscopy are inert (4). Alternatively, it is possible that IAPP formation is secondary to the onset of hyperglycemia and not of primary importance in the pathophysiology of DM2 (4).

In the recently published review of islet amyloid (73), the authors concluded that in human DM2, islet amyloidosis largely results from diabetes-related pathologies (such as diabetes-associated abnormal proinsulin processing, which could contribute to destabilization of granular IAPP) and is

not an etiological factor for hyperglycemia. However, the associated progressive  $\beta$ -cell destruction leads to severe islet dysfunction and insulin requirement (Fig. 1).

### E. Linkage of reduced $\beta$ -cell mass and dysfunction

As reported previously (4), before IGT becomes apparent in humans (the earliest manifestation of incipient diabetes), there may have been loss of as much as approximately 50% of  $\beta$ -cell mass, and as overt diabetes develops, further loss might be limited to no more than an additional 10%, indicating a parallel impairment in  $\beta$ -cell function. In effect, marked impairment of first-phase insulin secretory responses to iv glucose at a very early stage in the development of hyperglycemia was shown, and by the time fasting plasma glucose exceeded 115 mg/dl, first-phase insulin responses were found mostly to be absent (77). When the first-phase insulin secretion was plotted as a function of fasting plasma glucose, in a study of Pima Indians, with progressive glucose intolerance from normal to DM2, it was apparent that very few persons with fasting plasma glucose above 110 mg/dl were able to mount even a minimal response to the iv glucose challenge (13). Hemi-pancreatectomy led to impaired  $\beta$ -cell function in healthy humans (78), whereas in rats, partial pancreatectomy results in impaired insulin secretion resembling that encountered in DM2 despite extensive regeneration of the remnant and only a modest increase in glycemia at the time of the study (79). It may be concluded from these studies that reduced  $\beta$ -cell mass can lead to impaired function, but the mechanism is not yet apparent, nor is it necessarily the sole factor (21).

Two possible explanations account for the impaired  $\beta$ -cell function consequent to decreased  $\beta$ -cell mass (21): 1) increased insulin demand on residual  $\beta$ -cells *per se* leading to changes in function (by ER stress or other mechanisms); and 2) hyperglycemia consequent to decreased  $\beta$ -cell mass driving the impairment in  $\beta$ -cell function. However, the decreasing  $\beta$ -cell mass experimentally more often than not leads to a more or less

prolonged period of hyperglycemia (79, 80). Moreover, in many instances there is compensatory regeneration of  $\beta$ -cells that might not be as well-differentiated as older, fully mature cells. Regardless, there are *in vitro* studies on islet and *in vivo* studies by glucose infusion showing that high glucose for prolonged periods of time leads to impaired  $\beta$ -cell mass and/or function. Therefore, accepting that glucose plays a central role among those factors contributing to  $\beta$ -cell demise whereas transient postprandial hyperglycemic excursions may predominantly induce  $\beta$ -cell proliferation in insulin-resistant individuals, this adaptive mechanism may fail in the long term and be overridden by  $\beta$ -cell apoptosis. However, it is unlikely that glucotoxicity acts alone, and the negative contribution of saturated FAs, lipoproteins, leptin, and circulating and locally produced cytokines will burn out the  $\beta$ -cells further. These factors will induce apoptosis and/or necrosis, which in the presence of proinflammatory cytokines may activate specific immunological phenomena, ultimately resulting in autoimmunity as indicated above (46).

Notwithstanding, DM2 in humans progresses over time, whereas impaired  $\beta$ -cell function appears to be reversible at least to a certain degree in the early stages of the disease. In effect, the overnight infusion of glucagon-like peptide 1 (GLP-1) in DM2 improved first- and second-phase insulin responses to a 2-h hyperglycemic clamp. All responses on GLP-1 were not significantly different from nondiabetic control subjects (81). Besides, a recovery of the first-phase insulin secretion was observed after the addition of rosiglitazone given for 6 months to failing sulfonylurea and metformin regimen in DM2 with a duration of diabetes of  $7.6 \pm 2.1$  yr (82). Similarly, the iv administration of the incretin mimetic, exenatide, maintained for 30 min, to DM2 patients treated with diet/exercise, with a duration of the disease of  $4 \pm 2$  yr, restored the first and second phases of insulin secretion, after glucose challenge, with a pattern similar to that found in healthy paired controls (83). These results are compatible with the view that the deficient pattern of insulin secretion is mainly functional in nature and that the reduction in pancreatic islet mass is moderate in patients with DM2 (4, 83). However, the recovery of insulin secretion should be tested in further studies focusing on patients with more advanced stages of DM2. Furthermore, if an individual with DM2, even with severe hyperglycemia, is rendered euglycemic by either pharmacological means or changes in lifestyle,  $\beta$ -cell function, in particular glucose responsiveness, can be restored, and this will be discussed later. This is particularly true in newly diagnosed DM2 (84, 85) where the limiting threshold for reversibility of decreased  $\beta$ -cell mass has probably not been passed. Rendering an individual with DM2 euglycemic interrupts the vicious circle linking decreased  $\beta$ -cell function with hyperglycemia. This might not only restore insulin secretory patterns but also allow for some restoration of  $\beta$ -cell mass. Although there are many reasons to believe that this may occur in humans as it does in animal models of reduced  $\beta$ -cell mass, this has never been documented by virtue of the fact that  $\beta$ -cell mass cannot be measured noninvasively at the time of writing.

Understanding the mechanisms of  $\beta$ -cell death and thus the decreased  $\beta$ -cell mass and impaired function has provided the basis for a new therapeutic target,  $\beta$ -cell preservation, particularly when one considers the reversibility of impaired  $\beta$ -cell function and possibly  $\beta$ -cell mass as dis-

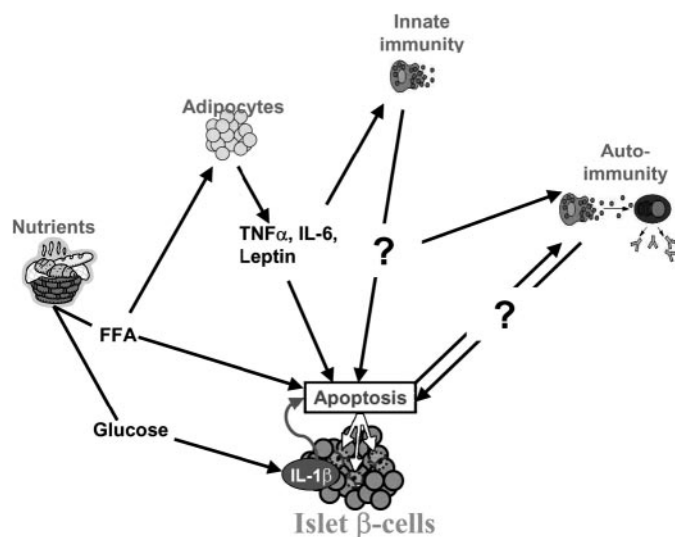

FIG. 1. Proposed model for the interplay between “aggressors” of the  $\beta$ -cell in the pathogenesis of DM2. [Reproduced with permission from M. Y. Donath *et al.*: *J Mol Med* 81:455–470, 2003 (67).]



cussed above. In this context, it should be noted that long-acting incretin mimetics, which besides enhancing glucose-sensing and insulin secretory capacity of the endocrine pancreas have also been shown in preclinical studies in rodents, have additional effects on  $\beta$ -cell mass by stimulating proliferation and inhibiting apoptosis (86).

Other examples include the thiazolidinediones (TZDs), which have been linked to not only improving insulin secretory capacity but also preventing the loss of  $\beta$ -cell mass by reducing apoptosis with maintenance of  $\beta$ -cell neogenesis in ZDF rats (87) as well as in other murine models of DM2 (88). In human beings, TZDs were able to preserve and recover  $\beta$ -cell function (82, 89) besides improving insulin sensitivity.

**Summary/conclusions.** Numbered among the factors for progressive loss of  $\beta$ -cell function and mass are glucotoxicity and lipotoxicity, which are closely interrelated in the sense that lipotoxicity does not exist without chronic hyperglycemia and, depending on duration of exposure to glucose or FFAs and on genetic background of the islets, may induce  $\beta$ -cell proliferation and have pro- or antiapoptotic effects.

Proinflammatory cytokines and leptin, produced by fat tissue, could also affect  $\beta$ -cells. In particular, leptin, TNF- $\alpha$ , IL-6, and IL-1 receptor antagonist are a linkage of obesity to DM2. Leptin in islets leads to  $\beta$ -cell apoptosis, whereas TNF- $\alpha$  and IL-6 may also modulate  $\beta$ -cell survival. Apoptotic cells can provoke mobilization of T cells reactive to  $\beta$ -cell antigens, culminating in autoimmune destruction of  $\beta$ -cells similar to that observed at earlier stages of type 1 diabetes.

Regarding the IAPP, several factors support its role in the pathophysiology of  $\beta$ -cell loss in DM2. Alternatively, it is possible that IAPP formation is secondary to the onset of hyperglycemia and not of primary importance in the pathophysiology of DM2.

The link of reduced  $\beta$ -cell mass to impaired function may be due to an increased demand on residual  $\beta$ -cells *per se* leading to changes in function (ER stress or other mechanisms) or related to the hyperglycemia consequent to decreased  $\beta$ -cell mass, driving the impairment in  $\beta$ -cell function. *In vitro* and *in vivo* studies suggested that persistently elevated glucose levels play a central role among those factors (FFAs, lipoproteins, leptin, and cytokines) contributing to  $\beta$ -cell demise.

Understanding the mechanisms of  $\beta$ -cell death and thus decreased  $\beta$ -cell mass and impaired function has provided the basis to  $\beta$ -cell preservation, particularly when one considers that the impaired  $\beta$ -cell function and possibly  $\beta$ -cell mass appear to be reversible, particularly at early stages of the disease where the limiting threshold for reversibility of decreased  $\beta$ -cell mass has probably not been passed.

#### IV. Clinical Intervention to Preserve or “Rejuvenate” $\beta$ -Cells

##### A. Short-term intensive insulin therapy of newly diagnosed DM2

Optimal metabolic control, especially early intensive glycemic control, plays a role in the prevention of progressive  $\beta$ -cell dysfunction and possibly destruction of the  $\beta$ -cells with worsening of diabetes. Many reports have shown that induction of normoglycemia in DM2 results in both im-

proved  $\beta$ -cell function and insulin resistance (90, 91). Rarely, however, has a prolonged benefit been demonstrated with virtually all patients becoming hyperglycemic again after a few weeks (92, 93). Until recently, it was unknown whether such outcomes pertained to new-onset DM2, although patients having failed diet therapy may show a good response to a short period of intensive insulin therapy by continuous sc insulin infusion (CSII) (94). Ryan *et al.* (84) recently reported that, in 16 severe (mean fasting plasma glucose of 239 mg/dl) newly diagnosed DM2 patients, a 2- to 3-wk course of intensive insulin therapy by multiple daily insulin injection (NPH plus regular) was able to maintain good glycemic control at 1 yr in seven of the subjects on diet therapy alone, whereas eight required oral hypoglycemic agent and one required insulin therapy. The distinguishing features of those who did not require oral agents or insulin treatment were that they required less insulin during the active insulin therapy phase ( $0.37 \pm 0.05$  vs.  $0.73 \pm 0.07$  U/kg·d) and were able to attain a lower fasting serum glucose level at the end of the period of insulin therapy ( $106 \pm 5$  vs.  $139 \pm 7$  mg/dl). It is interesting to highlight that the majority of the study patients (15 of 16) had an evident recovery of the area under the curve (AUC) insulin (oral glucose tolerance test) after the end of insulin therapy, being dramatically higher than study entry values associated with a significant reduction in AUC glucose by year end, probably related to the correction of gluco- and lipotoxicity (significant reduction in triglycerides and FFAs). Thus, the potential benefits of early, aggressive intervention with insulin therapy to counter both  $\beta$ -cell dysfunction (and insulin resistance) must be considered: effects of insulin therapy against chronic hyperglycemia and lipotoxicity-induced apoptosis of the  $\beta$ -cells.

In a similar study (85), 138 newly diagnosed DM2 patients with fasting glucose greater than 200 mg/dl were hospitalized and treated with CSII for 2 wk. After CSII, the patients were followed longitudinally on diet alone. Optimal glucose control was achieved within  $6.3 \pm 3.9$  d in 126 patients. The remission rates (percentage of individuals maintaining near euglycemia) at the third, sixth, 12th, and 24th months were 72.6, 67.0, 47.1, and 42.3%, respectively. Patients who maintained glycemic control for more than 12 months (remission group) had greater recovery of  $\beta$ -cell function than those who did not (nonremission group) when assessed immediately after CSII. HOMA of  $\beta$ -cell function (HOMA- $\beta$ ) and AUC insulin during iv glucose tolerance test, as well as change in AIR, were significantly higher in the remission group. Furthermore, proinsulin decreased highly significantly; thus the proinsulin/insulin ratio was also reduced highly significantly (indication of an improvement in the quality of insulin secretion) as well as the HOMA of insulin resistance (HOMA-IR; surrogate for evaluation of the degree of insulin resistance) in the remission group. Li *et al.* (85) concluded that the improvement of  $\beta$ -cell function, particularly the restoration of the first-phase insulin secretion, could be responsible for the remission.

**Summary/conclusions.** Among the clinical interventions to preserve or “rejuvenate”  $\beta$ -cells, short-term intensive insulin therapy of newly diagnosed DM2 has been proposed: 2- to 3-wk intensive therapy with multiple daily insulin injections of NPH plus regular or CSII. The improvement of  $\beta$ -cell

function, especially the restoration of the first-phase insulin secretion, would lead to remission at least for a period of time. Furthermore, proinsulin decreased highly significantly as did PI/IRI ratio, indicating an improvement in the quality of insulin secretion.

#### B. Modulation of the $\beta$ -cell ATP-sensitive $K^+$ ( $K_{ATP}$ ) channel

It has been well demonstrated that insulin release by the  $\beta$ -cell is initiated by an increase in the intracellular  $Ca^{2+}$  concentration that is mediated by  $Ca^{2+}$  influx through voltage-gated  $Ca^{2+}$  channels in the plasma membrane. The opening and closing (gating) of these  $Ca^{2+}$  channels is determined by  $\beta$ -cell membrane potential, which is in turn regulated by the activity of the  $K_{ATP}$  channel. In the unstimulated  $\beta$ -cell,  $K_{ATP}$  channels are open and the outward movement of  $K^+$  ions through these channels holds the membrane potential at a hyperpolarized level at which voltage-gated  $Ca^{2+}$  channels are closed. When plasma glucose concentration rises, glucose uptake and metabolism by the pancreatic  $\beta$ -cell are enhanced and, possibly through changes in intracellular adenosine nucleotide concentrations, induce  $K_{ATP}$  channel closure. This leads to membrane depolarization, opening voltage-gated  $Ca^{2+}$  channels, and an increase in cytosolic  $Ca^{2+}$  that triggers the exocytosis of insulin. Drugs like the sulfonylureas act by inhibiting the  $K_{ATP}$  channel directly, and thereby through depolarizing the  $\beta$ -cell and stimulating  $Ca^{2+}$  influx they enhance insulin secretion. Another class of drugs is the  $K$ -channel openers. These comprise a structurally unrelated group of compounds that have the common property of opening  $K_{ATP}$  channels, which hyperpolarizes the  $\beta$ -cells and prevents insulin release, even in the presence of glucose. The most potent  $K_{ATP}$  channel opener in the  $\beta$ -cell used in clinical medicine is diazoxide (95).

The concept of deficient insulin stores as a contributing factor to  $\beta$ -cell dysfunction in DM2 was recognized 30 yr ago when diazoxide was used to inhibit insulin secretion (and induce  $\beta$ -cell “rest”) in patients with DM2 receiving insulin, leading to restoration of the insulin response to a combined stimulation of  $\beta$ -cells with glucagon plus tolbutamide, not observed in control diabetics receiving placebo with insulin (96). Diazoxide has successfully been used to improve  $\beta$ -cell function in animal studies, such as the recovery of  $\beta$ -cell responsiveness in 90% pancreatectomized diabetic rats (97), and to prevent the progress of deranged  $\beta$ -cell function in rats with streptozotocin-induced diabetes (98). Besides, *in vitro* studies of human islets have demonstrated that chronic hyperglycemia desensitizes  $\beta$ -cells to glucose being accompanied by three major  $Ca^{2+}$  abnormalities: elevated basal  $Ca^{2+}$ , loss of glucose-induced rise in  $Ca^{2+}$ , and oscillatory activity disturbance with a decrease in glucose-induced slow oscillations. Relieving overstimulation with coculture with diazoxide (and 486 mg/dl glucose) significantly restored postculture insulin responses to glucose, lowered basal  $Ca^{2+}$ , and normalized glucose-induced oscillatory activity, but failed to restore  $Ca^{2+}$  during postculture glucose stimulation (99). Therefore, the induction of  $\beta$ -cell rest by selective activation of  $\beta$ -cell  $K_{ATP}$  channels preserving insulin stores and pulsatile insulin secretion may provide a strategy to protect

$\beta$ -cells from chronic overstimulation and to improve islet function. In effect, short-term diazoxide treatment of obese DM2 patients with poor metabolic control exerted moderate but beneficial effects on important parameters of insulin secretion: absent insulin response to an iv glucose challenge and glucose potentiation of arginine-induced insulin secretion after insulin treatment, whereas a response to both tests, albeit moderate, could be demonstrated after insulin plus diazoxide treatment. These effects could be dissociated from confounding effects of changes of glycemia because insulin infusion was used to achieve close to identical degrees of glycemia during the two treatment periods. Consequently, the results of this study indicate the beneficial effects of  $\beta$ -cell rest. Besides, a significant reduction of the molar ratio of proinsulin to insulin was observed only after diazoxide plus insulin (100). The response to glucose and glucose potentiation of arginine-induced insulin secretion has been shown to correlate to the functioning islet mass as demonstrated after islet autotransplantation in humans (101).

It was also observed that, in adults with autoimmune diabetes, diazoxide treatment at onset preserved some residual insulin secretion for up to 18 months, when compared with a placebo group, when both groups were also receiving multiple insulin injection therapy (102). A similar study was performed in childhood type 1 diabetes, demonstrating that partial inhibition of insulin secretion for 3 months with diazoxide at onset of the disease, in addition to multiple daily insulin injections, extended the period of remission and temporarily preserved residual insulin production compared with placebo (maximum at 6 months, followed by a progressive decline) (103).

Although the beneficial effect of diazoxide may be due to induction of  $\beta$ -cell “rest,” it could also reflect in part the antiapoptotic effect of this type of drug because it was demonstrated that incubation of murine pancreatic islets and  $\beta$ -cells with glucose induced apoptosis of  $\beta$ -cells that is  $Ca^{2+}$  dependent, because introduction to the culture medium of diazoxide, which blocked glucose-induced  $Ca^{2+}$  increase, inhibited apoptosis (45). It is interesting to point out that the closure of  $K_{ATP}$  channels by the sulfonylureas tolbutamide and glibenclamide may also induce  $Ca^{2+}$ -dependent  $\beta$ -cell apoptosis in rodent and human islets (45, 104, 105), but this effect has only been observed *in vitro* and not consistently (106). The induction of  $\beta$ -cell rest by a new selective  $K_{ATP}$ -channel opener (NN414) preserved insulin stores and pulsatile insulin secretion without restoring the orderliness of insulin secretion in human islets, isolated from cadaveric organ donors, cultured at high glucose concentrations (198 mg/dl) (107). According to Ritzel *et al.* (107), the concept of  $\beta$ -cell rest may provide a strategy to protect  $\beta$ -cells from chronic overstimulation and improve islet function. The authors also provide evidence that impaired glucose-regulated insulin secretion in DM2 partially involves mechanisms distinct. Afrom insulin stores and insulin secretion rates (ISRs).

In line with findings indicated in Section IV.A related to insulin therapy of newly diagnosed DM2, a clinical study by Alvarsson *et al.* (108), comparing insulin and sulfonylurea (glibenclamide) treatment of recently (<2 yr) diagnosed DM2, showed that treatment with insulin given twice daily as premixed insulin (30% soluble and 70% NPH) preserved

$\beta$ -cell function (glucagon-stimulated C-peptide response) more effectively than glibenclamide for the duration of the study (2 yr). On the other hand, the nonsulfonylurea secretagogues (meglitinides) repaglinide and nateglinide, which work similarly to sulfonylurea agents but have a more rapid onset and shorter duration of action, when applied for their respective circulating half-lives (less than 2 h) *in vitro*, appear not to have any apoptotic effect on cultured human islets. Thus, short-acting insulin secretagogues may be preferred to long-acting ones, such as glibenclamide, due to the fact that patients will be less exposed to proapoptotic stimuli during prolonged treatment with short-acting agents. This was according to *in vitro* studies of human islets, but *in vivo* confirmation is necessary because several additional factors including  $\beta$ -cell proliferation and regeneration may compensate for glibenclamide-induced apoptosis (105).

**Summary/conclusions.** The induction of  $\beta$ -cell “rest” by selective activation of  $\beta$ -cell  $K_{ATP}$  channels, using drugs such as diazoxide and the  $K_{ATP}$  channel opener NN414, that hyperpolarize  $\beta$ -cells, preserves insulin stores and pulsatile insulin secretion, thus protecting  $\beta$ -cells from chronic overstimulation and improving islet function besides reducing the PI/IRI ratio. Although the beneficial effect of those selective  $K_{ATP}$  channel openers may be due to inducing  $\beta$ -cell “rest,” it could also reflect in part the antiapoptotic effect of these drugs by blocking the glucose-induced cytosolic  $Ca^{2+}$  increase, secondary to the  $\beta$ -cell  $K_{ATP}$  channels closure associated with the rise in plasma glucose, as shown in *in vitro* studies which have demonstrated that glucose-induced apoptosis of  $\beta$ -cells is  $Ca^{2+}$  dependent. The closure of  $K_{ATP}$  channels by sulfonylureas, tolbutamide and glibenclamide, may also induce  $Ca^{2+}$ -dependent  $\beta$ -cell apoptosis also in *in vitro* studies in rodent and human islets. If these findings translate to patients with DM2, at least some long-acting sulfonylureas may have adverse effects on  $\beta$ -cells, whereas short-acting ones will be preferred due to the fact that patients will be less exposed to proapoptotic stimuli during protracted treatment with these agents.

### C. Antiapoptotic drugs

1. **Leptin.** As indicated earlier, leptin in ZDF rat islet protects the  $\beta$ -cell from FFA-induced apoptosis (109). However, it induces  $\beta$ -cell apoptosis in human islets by the mechanism previously discussed (70).

2. **Aminoguanidine.** Aminoguanidine acts as an antioxidant *in vivo* in diabetic animal models, preventing ROS formation and lipid peroxidation in cells and tissues, while also preventing oxidant-induced apoptosis (110). Moreover, at higher doses this inhibits inducible nitric oxide synthase with reduction in nitric oxide, which has been shown to mediate IL-1 $\beta$ -induced impairment of  $\beta$ -cell function and ultimately cause  $\beta$ -cell apoptosis as reported in cultured prediabetic ZDF islets (59, 111). Because ROS are known to increase intracellular advanced glycation end-products (AGEs) and antioxidants are known to inhibit AGE formation (110), presumably the time required for formation of immunodetectable intracellular AGEs is much longer than the time-course for oxidant-induced apoptosis, suggesting that intracellular

AGE formation does not play a causal role in this process of oxidant-induced apoptosis. Furthermore, diabetic models using aminoguanidine have also shown a reduction in diabetes-related complications such as retinopathy, neuropathy, and nephropathy. Specifically, reduction in retinal microvessel formation, albuminuria, and the prevention or decrease in motor and sensory nerve conduction velocity have been reported (see references cited in Ref. 112). In line with previously indicated considerations (47), the prescription of antioxidants as adjunct therapy in DM2 is warranted to determine whether this approach would prevent continued deterioration in  $\beta$ -cell function, particularly when glycemic control is not satisfactory (47). Unfortunately, studies with antioxidant vitamins to date have not improved glycemic control. Additionally, aminoguanidine has not been used in humans because of its side effect profile in many organs.

**Summary/conclusions.** Aminoguanidine acts as an antioxidant *in vivo*, in diabetic animal models, preventing ROS formation and lipid peroxidation and oxidant-induced apoptosis and at higher doses inhibits inducible nitric oxide synthase with reduction in nitric oxide, which was shown to ultimately cause  $\beta$ -cell apoptosis in cultured prediabetic ZDF rat islets. Aminoguanidine has not been used in humans because of its side effect profile in many organs.

3. **Effect of TZDs on  $\beta$ -cells.** The TZDs are agonists of peroxisome proliferator-activated receptor  $\gamma$  (PPAR $\gamma$ ), a nuclear receptor that regulates transcription of genes involved in lipid and glucose metabolism. Although predominantly expressed in adipose tissue, PPAR $\gamma$  is present in other insulin-sensitive tissues, including the pancreatic islet cells (113). Fully 10% of genes transcribed in adipose tissue are differentially expressed with the use of a PPAR $\gamma$  agonist, as well as 2% of all genes expressed in liver and 1% of those expressed in skeletal muscle (114). In adipose tissue, stimulation of PPAR $\gamma$  increases adipocyte differentiation, resulting in an increased number of small, insulin-sensitive adipocytes (115). The development of these insulin-sensitive cells enhances glucose uptake, improving glycemic control. Improved insulin sensitivity, reported for TZDs, both in monotherapy and combination in DM2, has the potential to protect  $\beta$ -cells because they may reduce the demand on the pancreas (see references cited in Ref. 116). Lowering plasma glucose may reduce the risk of glucotoxicity. In addition, by increasing adipose-tissue mass, TZDs promote FA uptake and storage in adipose tissue, thus reducing levels of circulating FFAs where this has the potential to alleviate lipotoxicity. Hence, TZDs retain fat where it belongs, according to the “FA steal” hypothesis (115). Reductions in FFAs may be mediated by suppression of TNF- $\alpha$  expression, which has been demonstrated by *in vitro* studies such as those of Arner (117), who has reported that rosiglitazone suppresses TNF- $\alpha$  to almost undetectable levels in human preadipocytes. Thus, according to Arner (117), TZDs reduce the release of FFAs from the adipocytes by two mechanisms: 1) increasing the insulin sensitivity of the cell, and thereby improving the antilipolytic effect of insulin; and 2) reducing levels of TNF- $\alpha$ , known to suppress the antilipolytic properties of insulin by inhibiting the insulin-signaling cascade.

Although rosiglitazone seems to be a pure PPAR $\gamma$  agonist,



the other TZD approved for the medical therapy is pioglitazone, which seems to also act like a partial PPAR $\alpha$  agonist (118). In general, PPAR $\alpha$  regulates genes involved in FA uptake and oxidation (liver, kidney, heart, and skeletal muscle), inflammation, and vascular function, whereas PPAR $\gamma$ , as shown, regulates genes involved in FA uptake and storage, inflammation, and glucose homeostasis (119).

*a. Animal data.* In obese ZDF rats, the overaccumulation of fat in the pancreatic islets induces  $\beta$ -cell dysfunction, reflecting a mutation of the leptin receptor that blocks the normal triglyceride-lowering action of leptin on islets, as discussed previously, leading to lipotoxicity through exaggerated production of nitric oxide (111). In isolated islets from obese ZDF rats, addition of troglitazone halved the triglyceride content, doubled insulin secretion stimulated by arginine, and produced a greater than 30-fold increase to that stimulated by glucose (120). This is consistent with the ability of TZDs to prevent TNF- $\alpha$ -induced inhibition of insulin signaling by islets. In the same animal model, rosiglitazone treatment was shown to maintain  $\beta$ -cell proliferation and to produce a 5-fold attenuation in the net rise in  $\beta$ -cell death, preventing the loss of  $\beta$ -cell mass indicated previously (87). Because excessive  $\beta$ -cell apoptosis is associated with excessive accumulation of intracellular triglycerides, as reported earlier (59), staining of islet cells for insulin in diabetic db/db mice has shown evidence of regranulation when the islet cell triglyceride content had been reduced with rosiglitazone (121). Furthermore, pioglitazone given to three murine models of DM2 improved insulin secretory capacity and prevented the loss of  $\beta$ -cell mass by reduction of oxidative stress with 1.5- to 15-fold higher levels of pancreatic insulin (122). The decrease of TNF- $\alpha$  expression by pioglitazone in adipose tissue in db/db mice (123) might be associated, as indicated above, with an improvement in  $\beta$ -cell dysfunction and survival. Treatment with rosiglitazone has also been shown to prevent islet amyloidosis in nondiabetic hIAPP transgenic mice (124).

In conclusion, the most relevant data in rodents indicated that the TZDs decrease  $\beta$ -cell apoptosis, maintaining its neogenesis and preventing islet amyloidosis.

*b. In vitro data in human  $\beta$ -cells.* PPAR $\gamma$  mRNA is expressed in isolated human pancreatic islets to a greater extent than PPAR $\alpha$  mRNA, with predominance of PPAR $\gamma_2$ . This could be interpreted as a condition favoring lipid accumulation and, hence, lipid-induced damage (125). The expression of PPAR $\gamma_2$  was markedly and time-dependently reduced by exposure to progressively higher concentrations of FFAs. This effect was not affected by the concomitant presence of high glucose. The presence of FFAs also produced deleterious cytostatic effect, inhibiting glucose-stimulated insulin release by 80%, as well as reducing islet insulin content by 75% and reducing insulin mRNA expression (125). However, incubation with rosiglitazone, a well-known PPAR $\gamma$  agonist, prevented FFA-induced down-regulation of PPAR $\gamma$  and insulin mRNA expression along with glucose-stimulation insulin release (125). In the same model, high concentrations of FFAs produced an almost 3-fold increase in rates of islet cell death, in association with significant increases in activity of the protease enzymes caspase 3 (apopain) and caspase 9, key

mediators of apoptosis (104). Incubation with rosiglitazone at a concentration of 15 mg/ml attenuated islet cell death and normalized caspase activity levels (126).

Zeender *et al.* (127) were able to protect cultured human islets using pioglitazone (and sodium salicylate) against apoptosis and impaired function induced by IL-1 $\beta$  and high glucose by blocking NF- $\kappa$ B activation.

Lin *et al.* (128), noting the association of DM2 with increased  $\beta$ -cell apoptosis and the presence of islet amyloid derived from IAPP, showed that IAPP induces apoptosis in cultured human pancreatic islets and that the addition of rosiglitazone to the incubation prevented the IAPP-induced apoptosis.

#### *c. Mechanism of action of TZDs on the $\beta$ -cell*

*1) Indirect effects by amelioration of insulin sensitivity.* TZDs consistently lower fasting and postprandial glucose concentrations in clinical studies as well as plasma FFAs in type 2 diabetics, with a reduction of gluco- and lipotoxicity. Furthermore, as mentioned above, TZDs may directly protect the  $\beta$ -cell from lipotoxic insult (125). Besides, insulin concentrations also decrease in the majority of trials, mirroring a decreased secretory demand on  $\beta$ -cells. Such changes indicate that TZDs act as insulin sensitizers, which has been confirmed by direct measurements in *in vivo* studies in humans. Although the insulin-sensitizing effect of TZDs is well established, less is known about their influence on insulin secretion. It now appears that TZDs normalize the asynchronous insulin secretion that characterizes  $\beta$ -cell failure. In a placebo-controlled study in patients with DM2, 13-wk treatment with rosiglitazone was shown to increase the ability of an oscillatory glucose infusion to program high-frequency pulsatile insulin secretion, despite the absence of any direct action on  $\beta$ -cell secretory capacity. It was postulated that the improvement in  $\beta$ -cell function could be related to a reduction in glucotoxicity due to the improved glycemic control and/or improved insulin sensitivity seen with TZDs (129). This could suggest an increased ability of the  $\beta$ -cell to sense and respond to glucose changes within the physiological range after TZD treatment.

*2) Direct effects via PPAR $\gamma$  activation in pancreatic islets.* As a class effect, TZDs consistently improve basal  $\beta$ -cell function, as measured by the HOMA model and as observed during TZD monotherapy and combination therapy (89, 130–134). Further evidence that TZDs exert beneficial effects on  $\beta$ -cells derive from a study in which 2-month treatment with pioglitazone restored the first-phase insulin response to an iv glucose tolerance test in patients with IGT and with frank DM2 (135). Similar results were reported in a randomized 6-month study comparing the addition of rosiglitazone *vs.* insulin in patients with DM2 who were inadequately controlled on glimepiride and metformin, using a frequently sampled iv glucose tolerance test (FSIVGTT) (82). At study end, the AIR $_g$  was significantly increased with rosiglitazone, with no effect of exogenous insulin apparent.  $\beta$ -Cell function determined by the disposition index, calculated as the product of AIR $_g$  and the insulin sensitivity index ( $S_i = 1/\text{HOMA-IR}$ ) also increased greatly. It should be noted that the resto-

ration of the first-phase insulin response to glucose was independent of the correction of glucose toxicity.

Furthermore, extension studies with TZDs indicate that improvements in  $\beta$ -cell function are sustained in some individuals over time. Four 52-wk clinical trials involving more than 3,700 patients with DM2, reviewed by Campbell (136), showed that pioglitazone was an effective long-term treatment, both as monotherapy and in combination with metformin or sulfonylurea. As well as maintaining glycemic control over the long term, pioglitazone also yielded benefits in terms of improvements in fasting insulin (which was reduced as proinsulin and C-peptide), lipid parameters, and hypoglycemia compared with other monotherapies or combination treatments. The longest follow-up study was that by Bell and Ovalle (137, 138) of type 2 diabetics on sulfonylurea, metformin, and rosiglitazone for 60 months; 22 (68%) patients in the study who were put on the triple therapy remained relatively well controlled. The predictor of failure and the need for insulin after a mean duration of 30 months was the nonsignificant or lacking increase in the meal- or glucagon-stimulated C-peptide. At 60 months, a frequent finding was also a reduction in fasting C-peptide in the failure group.

TZDs may also improve insulin processing, as demonstrated by a reduction in the PI/IRI ratio, an important indicator of  $\beta$ -cell dysfunction outlined earlier (23). Rosiglitazone produced a decrease in the PI/IRI ratio in comparison with both placebo and sulfonylureas (139, 140), and similar results have also been reported for pioglitazone *vs.* placebo (141). Figure 2 summarizes the effects of TZDs on the  $\beta$ -cell (142).

*d. Further clinical evidence of TZD effects on human  $\beta$ -cell function.* Table 1 shows the clinical studies using rosiglitazone and pioglitazones, besides those presented above, previously published or in abstract form, that have demonstrated a beneficial effect of both agents in improving insulin sensitivity and recovery or improvement of  $\beta$ -cell function (141, 143–149). These results could suggest that the improvement in  $\beta$ -cell function could be, at least in part, secondary to the increase in insulin sensitivity (indirect effect on the  $\beta$ -cells). Further support for the beneficial effects of TZDs on  $\beta$ -cell function is provided by a study in which troglitazone

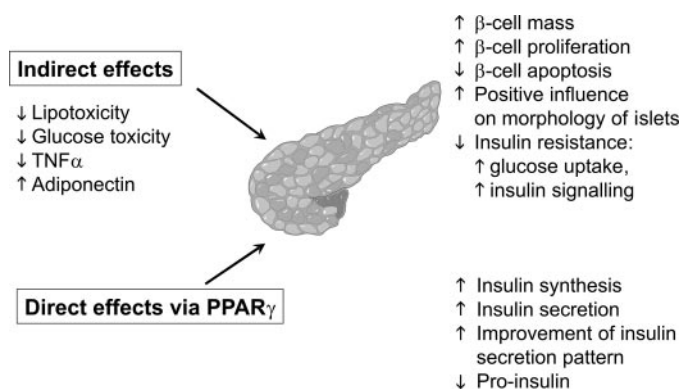

FIG. 2. Mechanism of action of TZDs on the pancreatic  $\beta$ -cell. [Reproduced with permission from H. Walter and G. Lübbers: *Drugs* 65:1–13, 2005 (142).]

improved  $\beta$ -cell function (150), as evaluated by meal-stimulated C-peptide levels or expressed by C-peptide/glucose ratio, when given to DM2 patients failing on metformin plus sulfonylurea ( $n = 28$ ). In contrast, there was no effect on  $\beta$ -cell function when metformin was given to patients failing on sulfonylurea monotherapy ( $n = 28$ ). These observations were particularly striking because the troglitazone-treated patients had a longer duration of diabetes (mean of 16 yr) than the metformin plus sulfonylurea-treated subjects (8 yr) (150). These researchers have previously reported (82) that addition of rosiglitazone restored the first-phase insulin response to glucose in poorly controlled patients previously treated with maximum doses of sulfonylurea plus metformin. However, the addition of insulin had no effect on  $\beta$ -cell function. In both studies, the beneficial effect of TZDs on  $\beta$ -cell function was independent of glycemic control (because with a similar reduction in HbA1c, no improvement in  $\beta$ -cell function was found in the insulin-treated group), indicating that TZDs can promote recovery of  $\beta$ -cell function independently of the amelioration of insulin sensitivity.

#### *e. TZDs in the prevention of diabetes*

*1 Troglitazone in Prevention of Diabetes (TRIPOD).* In this study (151), 266 Hispanic women with previous gestational diabetes mellitus who were at high risk for DM2 were randomized into placebo ( $n = 133$ ) or troglitazone ( $n = 133$ ) groups. Troglitazone, approved in the United States in 1997, was the first TZD for treatment of DM2, and it was withdrawn from the market in 2000 because of hepatotoxicity. During a median follow-up of 30 months, average annual diabetes incidence rates were 12.1 and 5.4 in women assigned to placebo and troglitazone, respectively ( $P < 0.01$ ). Eight months after troglitazone was withdrawn, 15% of the placebo subjects and 2.3% of the troglitazone group developed diabetes during a mean follow-up of 4.3 yr. The protective effect of the TZD was most prominent in women with a large reduction in insulin output during the FSIVGTT. Reducing the high secretory demands placed on  $\beta$ -cells through amelioration of chronic insulin resistance could preserve  $\beta$ -cell function and prevent DM2 for at least 4–5 yr.

*2 Pioglitazone in Prevention of Diabetes (PIPOD).* Eighty-nine Hispanic women with prior gestational diabetes mellitus who had completed participation in the TRIPOD study and were not diabetic (two thirds had IGT) participated in the PIPOD study for a planned 3 yr of drug treatment and 6 months of postdrug washout (152), with the annual diabetes incidence rate being 4.6%. The similarity of findings between the PIPOD and TRIPOD studies supports a class effect of TZDs reducing insulin secretory demands through a decrease in insulin resistance and preserving pancreatic  $\beta$ -cell function. The risk of diabetes proved lowest in the third of the women with the largest reduction in total FSIVGTT insulin AUC after 1 yr of treatment and highest in the third of women with the smallest reduction after 1 yr, thus indicating a “stabilization of  $\beta$ -cell function.”

*3 Diabetes Prevention Program (DPP).* The DPP was a randomized clinical trial of prevention of DM2 in people at high risk of diabetes (153). From 1996 to 1998, 3,324 adults with

TABLE 1. Clinical trials evidencing TZD effects on insulin sensitivity and  $\beta$ -cell function

| First author, year (Ref.) | Randomization                                                            | Study length (wk) | Insulin sensitivity                                                               | $\beta$ -cell function                                             | Proinsulin/insulin |
|---------------------------|--------------------------------------------------------------------------|-------------------|-----------------------------------------------------------------------------------|--------------------------------------------------------------------|--------------------|
| Publications              |                                                                          |                   |                                                                                   |                                                                    |                    |
| Fonseca, 2000 (143)       | Met + Rosi <i>vs.</i> Met + placebo (n = 348)                            | 26                | $\uparrow$ HOMA-S                                                                 | $\uparrow$ HOMA- $\beta$                                           |                    |
| Miyasaki, 2003 (144)      | Dose response to Pio <i>vs.</i> placebo (n = 58)                         | 26                | $\uparrow$ Insulin sensitivity                                                    | $\uparrow$ Insulinogenic index                                     |                    |
| Wallace, 2004 (141)       | Pio <i>vs.</i> placebo (n = 19)                                          | 12                | $\uparrow$ HOMA-S<br>$\uparrow$ Stimulated insulin sensitivity (euglycemic clamp) | $\uparrow$ HOMA- $\beta$<br>No change AIR <sub>g</sub>             | $\downarrow$       |
| Abstracts                 |                                                                          |                   |                                                                                   |                                                                    |                    |
| Pfützner, 2004 (145)      | Pio <i>vs.</i> SU (glimepiride) (n = 87)                                 | 36                | $\downarrow$ HOMA score (insulin resistance marker)                               | $\uparrow$ Insulin                                                 | $\downarrow$       |
| Rasouli, 2004 (146)       | Pio <i>vs.</i> Met (IGT) (n = 10)                                        | 10                | $\uparrow$ S <sub>i</sub> (FSIVGTT)                                               | $\uparrow$ AIR <sub>g</sub>                                        |                    |
| Vinik, 2004 (147)         | Rosi + SU (glipizide) (n = 115) <i>vs.</i> SU + placebo (n = 110)        | 24                | $\uparrow$ HOMA-S or ( $\downarrow$ HOMA-IR)                                      | $\uparrow$ HOMA- $\beta$<br>$\uparrow$ Insulinogenic index/HOMA-IR |                    |
| Hamdy, 2005 (148)         | Pio <i>vs.</i> placebo/SU (n = 30), Pio <i>vs.</i> placebo (IGT) (n = 8) | 16                | $\uparrow$ S <sub>i</sub> (FSIVGTT)                                               | $\uparrow$ AIR <sub>g</sub>                                        |                    |
| De Winter, 2005 (149)     | Pio <i>vs.</i> Met <i>vs.</i> SU (gliclazide) (n = 2406)                 | 48                | $\uparrow$ HOMA-S                                                                 | $\uparrow$ HOMA- $\beta$                                           |                    |

SU, Sulfonylurea; Met, metformin; Rosi, rosiglitazone; Pio, pioglitazone; insulinogenic index,  $\Delta$ AUC insulin/ $\Delta$ AUC glucose [oral glucose tolerance test (OGTT)].

IGT and fasting plasma glucose from 100 to 140 mg/dl before June 1997 and from 95 to 125 mg/dl after this date were randomized to receive placebo (n = 582), metformin (n = 587), troglitazone (n = 585), or intensive lifestyle intervention (n = 589). The incidence of diabetes during an average follow-up of 2.8 yr (after which the study was interrupted) stood at 11.0, 7.8, and 4.8 cases per 100 person-years in the placebo, metformin, and lifestyle change groups, respectively. The incidence of diabetes was reduced by 58% in the lifestyle group and by 31% in the metformin group relative to standard lifestyle intervention (placebo). Over concern regarding its liver toxicity, the troglitazone arm was discontinued in June 1998 after 0.5–1.5 yr (mean, 0.9 yr) and then compared with other DPP interventions, considering both the short-term “in-trial” results and the longer term results after troglitazone was discontinued. During the mean 0.9 yr of troglitazone treatment, the diabetes incidence rate was 3.0 cases per 100 person-years, compared with 12.0, 6.7, and 5.1 cases per 100 person-years in the placebo, metformin, and intensive lifestyle participants ( $P < 0.001$ , troglitazone *vs.* placebo;  $P < 0.02$ , troglitazone *vs.* metformin;  $P = 0.18$ , troglitazone *vs.* intensive lifestyle). Indirect measures of insulin secretion and sensitivity, estimated from the oral glucose tolerance test, suggested that the effect of the TZD was, at least in part, due to improved insulin sensitivity with maintenance of insulin secretion. During the 3 yr after troglitazone withdrawal, the diabetes incidence rate was almost identical to that of the placebo group. Troglitazone, therefore, markedly reduced the incidence of diabetes during its limited period of use, but this action did not persist (154).

4) TZD therapy in the prevention/delay of DM2 in patients with IFG+IGT. A total of 101 patients with IFG+IGT received troglitazone for an average of 10 months (after which the drug was withdrawn from the U.S. market), then randomly switched to rosiglitazone (n = 39) or pioglitazone (n = 62) for

a mean of 36 months (155). Patients with IFG+IGT who received no antidiabetic medication served as a control group (n = 71). Mean HbA1c and C-peptide levels measured at 2 yr and study end-point (3 yr) decreased from baseline (after troglitazone) for both TZDs at the 2-yr assessment, and reductions remained at that level at the end of the study. The cumulative incidence rate of diabetes after 3 yr was 2.97% after TZDs *vs.* 26.8% in the control group ( $P < 0.001$ ). An estimated 4.2 patients would have to be treated with the TZDs, rosiglitazone or pioglitazone, for every one prevented case of diabetes in the 3-yr study period (134). According to the authors, the study provided support for the notion that early detection through routine screening and the proper preventative measures, including TZD treatment, can prevent or postpone the progression of high-risk patients with IFG+IGT of developing DM2.

5) The Diabetes Reduction Assessment with Ramipril and Rosiglitazone Medication (DREAM) Trial. A total of 5269 adults aged 30 yr or more, with IFG and/or IGT and with no previous cardiovascular disease, received rosiglitazone (n = 2365) or placebo (n = 2634) and followed for a median of 3 yr (156). The primary outcome was a composite of incident diabetes or death. At the end of the study, taking into consideration the few individuals who dropped out from each group, 11.6% of the subjects given rosiglitazone and 26.0% receiving placebo developed the composite primary outcome (1.1% death and 10.6% DM2 in the rosiglitazone group *vs.* 1.3% death and 24.7% DM2 in the placebo group,  $P < 0.0001$ ). A total of 50.5% of the individuals on rosiglitazone and 30.3% on placebo became normoglycemic ( $P < 0.0001$ ).

Summary/conclusions. TZDs are agonists of PPAR $\gamma$ , a nuclear receptor that regulates transcription of genes involved in lipid and glucose metabolism. Regarding the effect of TZDs on  $\beta$ -cells, in murine models of DM2 and in isolated human pancreatic islets, there is an improvement of insulin



secretory capacity and decrease in  $\beta$ -cell apoptosis, maintaining its neogenesis and a reduction of islet amyloid.

In relation to the mechanism of action of TZDs on the  $\beta$ -cell, there are indirect and direct effects. The indirect effects are related to TZD action as insulin sensitizers, with a reduction in gluco- and lipotoxicity. Besides, it appears that TZDs normalize the asynchronous insulin secretion that characterizes  $\beta$ -cell failure. The direct effects are via PPAR $\gamma$  activation in pancreatic islet TZDs consistently improving basal  $\beta$ -cell function with significant improvement in AIR $_g$  and increased disposition index (AIR $_g \times 1/\text{HOMA-IR}$ ), the restoration of the first-phase insulin response to glucose being independent of the correction of glucose toxicity. Clinical studies using rosiglitazone or pioglitazone have demonstrated a beneficial effect of both agents in improving insulin sensitivity and recovery or improvement of  $\beta$ -cell function, which are sustained in some individuals over time. The addition of rosiglitazone improved the first-phase insulin response to glucose in poorly controlled patients previously treated with maximum doses of sulfonylurea plus metformin. However, the addition of insulin had no effect on  $\beta$ -cell function, despite a similar reduction in HbA1c.

The several trials on prevention of diabetes with TZDs include the following. In the TRIPOD and PIPOD, troglitazone (withdrawn in 2000, because of hepatotoxicity) and subsequently pioglitazone delayed or prevented the onset of diabetes. The class effect of TZDs on reducing insulin secretory demands (decrease in insulin output during FSIVGTT) through a decrease in insulin resistance preserved  $\beta$ -cell function and prevented DM2. The DPP was a clinical trial of DM2 prevention, conducted from 1996 to 1998 in individuals at high risk of diabetes and involving adults with IGT who were randomized to placebo, metformin, troglitazone, or intensive lifestyle intervention. The diabetes incidence rate was 3.0 cases per 100 person-years in the troglitazone group (mean, 0.9 yr), compared with 12.0, 6.7, and 5.1 cases per 100 person-years in placebo, metformin, and intensive lifestyle participants. In the trial of TZD therapy in the prevention/delay of DM2 in patients with IFG+IGT, 101 subjects received troglitazone for an average of 10 months (at which point the drug was withdrawn), then randomly switched to rosiglitazone or pioglitazone for a mean of 36 months. The cumulative incidence rate of diabetes after the 3 yr was 2.97% after TZDs vs. 26.8% in the control group: IFG+IGT ( $P < 0.001$ ). The study provided support for the idea that early detection and proper preventive measures, including TZD treatment, can prevent or postpone the progression of high-risk patients with IFG+IGT from developing DM2. Finally, the DREAM trial, showed that rosiglitazone for 3 yr reduced significantly incident DM2 (10.6% vs. 24.7% on placebo) and increased the likelihood of regression to normoglycemia in adults with IFG and/or IGT.

**4. Effect of incretin (GLP-1), incretin mimetics, and enhancers in  $\beta$ -cells.** Incretin hormones are peptides released by the gastrointestinal tract in response to nutrient ingestion that enhance insulin secretion and aid in the overall maintenance of glucose homeostasis through slowing of gastric emptying, inhibition of glucagon secretion, and control of body weight

(157). The two major incretins are GLP-1 and glucose-dependent insulinotropic polypeptide (GIP).

GLP-1 and GIP are small peptides, having 30 and 42 amino acids and released by the enteroendocrine L cells located in the distal ileum and colon and by the K cells in the duodenum, respectively. Both rapidly stimulate the release of insulin only when blood glucose levels are elevated, thereby enhancing the glucose-sensing and insulin secretory capacity of the endocrine pancreas during postprandial hyperglycemia (157). Although GLP-1 controls blood glucose via other actions besides stimulating glucose-dependent insulin release by inhibiting glucagon secretion and suppression of hepatic glucose output as well as decreasing the rate of gastric emptying, GIP decreases gastric emptying to a much lesser degree and does not inhibit glucagon secretion (157, 158). GLP-1 also activates regions in the central nervous system important for control of satiety (159). However, GLP-1 and GIP have also been shown in preclinical studies to exert significant cytoprotective and proliferative effects on the islets of Langerhans (157, 160, 161). The incretin hormones elicit their actions through direct activation of distinct G protein-coupled receptors expressed on islet  $\beta$ -cells (161, 162).

Native GLP-1 and GIP are rapidly inactivated by the ubiquitously expressed proteolytic enzyme dipeptidyl peptidase (DPP)-IV, which cleaves two N-terminal amino acids from both peptides to produce inactive metabolites (163). Regarding GLP-1, DPP-IV activation results in the inactivation of GLP-1 (7-36) amide and the generation of the metabolite GLP-1 (9-36) amide, which did not activate the GLP-1 receptor, thus not enhancing the insulin secretion and not blocking GLP-1 (7-36) amide enhancement of insulin secretion during an iv glucose tolerance test in healthy subjects (164). Recently, the suppression of hepatic glucose production by GLP-1 (9-36) amide not mediated by inhibition of glucagon secretion or through interaction with the known GLP-1 receptor has been shown in subjects with normal oral glucose tolerance tests (165). Thus, GLP-1 (9-36) amide may reduce postprandial glucose levels independent of insulin.

The short circulating half-life of bioactive intact GLP-1 and GIP initially limited enthusiasm for the potential use of incretin hormones in the treatment of diabetes. However, incretin analogs have been developed with significantly increased half-lives due to modification of the DPP-IV cleavage site and/or conjugation to large circulating proteins, such as albumin (*i.e.*, liraglutide). Furthermore, other GLP-1 receptor agonists are being tested in the treatment of DM2; presently available is synthetic exendin-4, structurally identical to native exendin-4 and originally isolated from the venom of a lizard, *Heloderma suspectum* (exenatide; Amylin Pharmaceuticals, Inc., San Diego, CA; and Eli Lilly and Co., Indianapolis, IN) (166–168).

Although both GLP-1 and GIP act as incretin hormones in normal subjects, only GLP-1 can be used to treat DM2 because diabetes is often associated with a blunted or absent response to GIP. It has been shown that whereas GLP-1 levels are significantly decreased in DM2, GIP values are normal, suggesting that DM2 patients are resistant to the biological effects of GIP, rendering it relatively ineffective (169). The mechanisms underlying the diminished GIP responsiveness

in experimental and clinical diabetes are not fully understood (170) but may involve down-regulation of GIP receptor expression (171) or receptor desensitization (172). Recent data have suggested that desensitization is not a major contributor to defective GIP action in diabetic patients (173).

A possible explanation for the decreased GLP-1 secretion in DM2 may be a decrease in gastric emptying rate, which hypothetically might increase the absorption in the proximal intestine, resulting in less food reaching the distal intestine where L cells are more numerous (169). Indeed, the opposite situation, increased exposure of carbohydrates to the distal intestinal mucosa by  $\alpha$ -glucosidase inhibitors or accelerated gastric emptying, increases GLP-1 secretion (174, 175). However, the gastric emptying rate does not seem to exhibit consistent changes in DM2 and obesity but is more often reported as delayed (see references cited in Ref. 169). In the study reported by Toft-Nielsen *et al.* (169), the decreased GLP-1 secretion in DM2 was considered most likely a consequence of the disease.

Unequivocal hypoglycemic action of GLP-1 in type 1 diabetes was demonstrated in studies of iv infusion of the peptide in subjects with type 1 diabetes in the hyperglycemic postabsorptive state. Under these conditions, without the administration of insulin, parenteral infusion of GLP-1 was able to reduce plasma glucose significantly; this was associated with inhibition of glucagon secretion, and stimulation of residual insulin secretion, although statistically significant, was only marginal (176). However, three of the 11 patients examined were C-peptide-negative in the basal state and demonstrated no clear increment under the influence of GLP-1 (176). It was hypothesized that a major component of the glycemic effect is attributable to the known action of GLP-1 to inhibit gastric emptying and glucagon secretion (177). Studies of the effects of the GLP-1 receptor (GLP-1R) agonist, exendin-4, given together with established doses of insulin before a meal, supported the hypothesis. The more prolonged actions of exendin-4 were accompanied by greater and more prolonged reduction of meal ingestion glycemic effects in volunteers with C-peptide-negative type 1 diabetes receiving continuing intensive insulin therapy, demonstrating the capacity of the combination therapy to normalize blood glucose levels after ingestion of meals consistent with the dietary program of the volunteers, without apparent increased risk of hypoglycemia within a normal between-meals interval (178).

Similar findings were observed with an enhancer of GLP-1 (DDP-IV inhibitor, vildagliptin) in insulin-pump-treated type 1 diabetic patients, inducing a significant reduction in the postprandial glucagon in comparison with placebo. This finding provides further evidence that the glucagonostatic effect of GLP-1 and incretin mimetics is mediated via an endocrine effect on the  $\alpha$ -cell rather than by a paracrine effect dependent on endogenous insulin release thought to tonically restrain glucagon secretion through a local endocrine/paracrine effect (179).

*a. Animal data.* Regarding the effect of GLP-1 on  $\beta$ -cells, it has been demonstrated that the acute effect is, as indicated earlier, potentiation of glucose-dependent insulin secretion (157), as also observed in healthy human subjects (170, 180),

subjects with IGT (181), and patients with DM2 (81, 170, 180). Its subacute effect is to enhance insulin biosynthesis and stimulation of insulin gene transcription and to increase expression of mRNA for glucose transporter-2 and glucokinase, as shown in *in vitro* studies in rodent models. The chronic GLP-1 action is stimulation of  $\beta$ -cell proliferation and induction of islet neogenesis from precursor ductal cells, which are associated with an expansion of  $\beta$ -cell mass. Finally, an inhibitory effect of GLP-1 was found in  $\beta$ -cell apoptosis. These effects were observed in rodent models of diabetes as well as in cultured  $\beta$ -cells (37, 182–184). Similar findings were obtained using the GLP-1R agonist exendin-4 in rats rendered diabetic by partial pancreatectomy (185). In Wistar rats, the age-dependent decline in  $\beta$ -cell function and the subsequent impairment of glucose tolerance were reversed by GLP-1 administration (186). It should be mentioned that the antiapoptotic effect of GLP-1 is independent from its glucose-lowering activity, as demonstrated by *in vitro* experiments in which GLP-1 was capable of inhibiting H2O2-dependent apoptosis in cultured mouse insulinoma cell lines. GLP-1 reduced DNA fragmentation and improved cell survival (184).

*In vivo* studies have demonstrated that GLP-1 and exendin-4 may improve glucose tolerance in animal diabetic models as well as in diabetic subjects (see references cited in Ref. 187). These beneficial effects were maintained long after the termination of GLP-1 or exendin-4 infusion. This finding indicates that GLP-1 induces long-term changes that cannot be due simply to the modulation of preformed insulin secretion but must involve more substantial modifications in the functional activity of  $\beta$ -cells. Recent findings from *in vivo* studies have shown that the beneficial long-lasting effects of GLP-1 can be partly attributed to changes in  $\beta$ -cell mass due to  $\beta$ -cell growth and differentiation (182). However, the ability to stimulate  $\beta$ -cell neogenesis was not associated with the promotion of proliferative lesions in a 2-yr rodent safety study (188) (Fig. 3).

The GLP-1-dependent regulation of glucose homeostasis appears to be based on biological mechanisms far more complex than the simple modulation of insulin secretion. Indeed, GLP-1 also affects the expression of insulin and other  $\beta$ -cell-specific genes whose products are involved in the regulation of glucose utilization. The mechanism by which GLP-1 modulates  $\beta$ -cell-specific gene expression is unknown, but recent studies strongly suggest involvement of the homeodomain transcription factor *PDX-1*. The capability of GLP-1 to regulate the expression of *PDX-1*, a major determinant in pancreatic organogenesis, has led investigators to propose that GLP-1 may be involved in the regulation of the mechanism(s) that governs endocrine phenotype specification during  $\beta$ -cell differentiation and growth (187).

Therapy with GLP-1R agonists has also been associated with expansion of  $\beta$ -cell mass via stimulation of  $\beta$ -cell proliferation, promotion of islet cell neogenesis, and inhibition of  $\beta$ -cell apoptosis (185, 190). Because GLP-1R is widely expressed and the observation that activation of GLP-1R signaling is coupled to stimulation of cell proliferation and enhanced cell survival, it is viewed as a positive aspect of GLP-1 action in the context of promoting expansion and survival of functioning  $\beta$ -cells (86) and has generated great

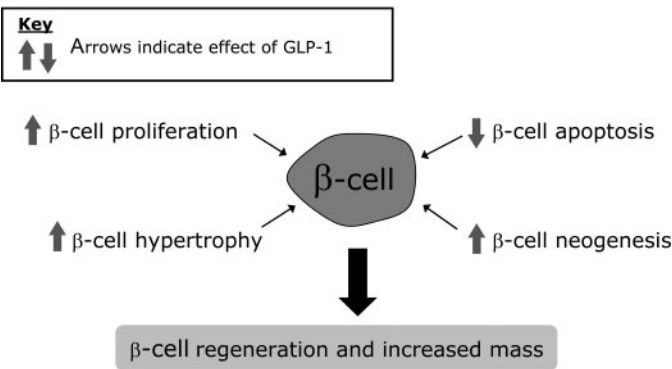

FIG. 3. GLP-1 stimulated  $\beta$ -cell regeneration and mass in animal models. [Reproduced with permission from A. Bahnsali: International Investigator’s Meeting of the Clinical Study NN 2211-1697 (Liraglutide) Zurich, Switzerland, April, 2006 (189).]

interest in the development of GLP-1R agonists for treatment of DM2. However, the proliferative and antiapoptotic action of these agents may have theoretical consequences on tumor formation in either the endocrine or exocrine pancreas, considering that GLP-1R may also be expressed in the pancreatic ductal epithelium, a potential precursor site for the development of pancreatic cancer. Recently it was shown that although human pancreatic cancer cell lines may express a functional GLP-1R, activation of GLP-1R signaling by synthetic exendin-4 was not coupled to stimulation of cell proliferation or resistance to cell death in short-term studies (191). The levels and duration of exendin-4 exposure in the study in question were considerably different from levels of exposure to exendin-4, recently introduced in the treatment of DM2, that might be expected in human subjects.

Furthermore, it was shown that human and nonhuman primate islet culture with exendin-4 and daily exendin-4 administration to transplant recipients (nondiabetic or diabetic mice) increase both the survival and function of islets transplanted into the liver (192).

In Table 2 are presented the animal data relative to the effects of GLP-1 and incretin mimetics (exendin-4 and liraglutide) on  $\beta$ -cells.

*b. In vitro data in human  $\beta$ -cells.* Farilla *et al.* (195) found that GLP-1 delayed the morphological changes that occurred in human islets in culture, indicated by a longer-lasting preservation of their three-dimensional structure, along with maintenance of the noncellular membrane that surrounds healthy human islets. GLP-1 promoted a time-dependent increase in the expression of the antiapoptotic protein bcl-2 and a down-regulation of the intracellular levels of the active form of caspase-3. A similar effect was observed at the

mRNA level for bcl-2 and caspase-3. It was also shown that by improving cell viability, Farilla *et al.* (195) were able to show a significant amelioration of islet cell function. Indeed, GLP-1-treated human islets contained more insulin and were capable of greater glucose-dependent insulin secretion. However, because of the short-term nature of the experiment (the islets were cultured up to 5 d), an increase in the size or number of islets was not observed in response to GLP-1.

Furthermore, it was demonstrated by Buteau *et al.* (196) that GLP-1 prevented glucose- and palmitate-induced apoptosis, singly or combined, in overnight cultured human islet cells isolated from healthy organ donors, between 50 and 65 yr old. The antiapoptotic action was mediated via activation of the phosphatidylinositol-3 kinase/protein kinase B signaling pathway, enhanced downstream target NF- $\kappa$ B DNA binding activity, and possibly stimulating the expression of IAP-2 and Bcl-2, two antiapoptotic genes under the control of NF- $\kappa$ B. The same antiapoptotic mechanism was observed earlier by Hui *et al.* (184) in cultured mouse insulinoma cell line and, as stated above, in human islets (195). Inhibition of NF- $\kappa$ B abolished the prevention of glucolipotoxicity by GLP-1. The antiapoptotic action of GLP-1 and incretin mimetics, in addition to their incretin effect, are of great interest as therapeutic agents in the treatment of DM2, particularly in the presence of glucolipotoxicity, which is an important factor for  $\beta$ -cell decompensation in the development of obesity-associated DM2 (196). It would be interesting to mention that GLP-1-induced  $\beta$ -cell proliferation has not yet been reported in human islets, only in rodent.

Microarray analysis performed on cultured human islet preparations by Hui *et al.* (197) showed that the long-acting GLP-1 analog liraglutide modulated the expression of multiple members of the TGF- $\beta$  pathway.

*c. Clinical evidence of incretin mimetic effects on human  $\beta$ -cell function*

*1) GLP-1 receptor agonists.* In DM2 individuals, like native GLP-1, GLP-1 receptor (GLP1-R) agonists enhance insulin release and inhibit glucagon secretion, in addition to delaying gastric emptying, improving insulin sensitivity and activating regions in the central nervous system that control satiety and reduces body weight (198). More recently, studies with animal models suggest that GLP-1R agonists may also enhance insulin-independent glucose disposal in peripheral tissues, potentially via stimulation of glucose sensors located in the portal vein and subsequent activation of neuronal pathways that modify glucose clearance (199). In addition to glucoregulatory actions, GLP-1R agonists exhibit protective

TABLE 2. Effects of incretin (GLP-1) and incretin mimetics (exendin-4 and liraglutide) on  $\beta$ -cells: animal studies

| Experimental model                         | Ref.                  | GLP-1/incretin mimetic | Replication | Proliferation | Neogenesis | Differentiation | Apoptosis | Mass |
|--------------------------------------------|-----------------------|------------------------|-------------|---------------|------------|-----------------|-----------|------|
| Rodent diabetes or cultured $\beta$ -cells | 37, 86, 184, 187, 190 | GLP-1/exendin-4        | ↑           | ↑             | ↑          | ↑               | ↓         | ↑    |
| Partially pancreatectomized rats           | 185, 193, 194         | Exendin-4, liraglutide | ↑           |               | ↑          |                 | ↓         | ↑    |
| Aging Wistar rats                          | 186, 190              | GLP-1                  |             |               | ↑          | ↑               | ↓         | ↑    |



effects in the cardiovascular and nervous systems after experimental injury (see references cited in Ref. 198).

**Exenatide.** In clinical studies, exenatide (synthetic exendin-4) exhibited actions that are similar to those of GLP-1, as outlined above: stimulation of insulin secretion only when glucose concentrations are elevated, suppression of postprandial glucagon secretion, slowing of gastric emptying, and promoting of satiety (157). The significant attenuation of postmeal plasma glucose elevation after exenatide infusion was related to a reduction in the rate of oral glucose appearance in the systemic circulation and enhancement of the suppression of endogenous glucose production; half of the decrease in endogenous glucose production results from the inhibition of glucagon secretion and half from increased insulin secretion, as observed in a study of six DM2 patients taking metformin plus sulfonylurea, with HbA1c approximately 8.5% (200).

Three similarly designed 6-month placebo-controlled trials form the basis of the approval of exenatide for use in patients with DM2 who exhibit unacceptable glycemic control while on metformin and/or a sulfonylurea, testing the addition of exenatide to metformin alone, sulfonylurea alone, or metformin and a sulfonylurea together (166–168). The placebo-adjusted decline of HbA1c from baseline levels of 8.2–8.6% was approximately 1.0% in each trial. A mean placebo-adjusted weight loss of 2.5 kg occurred when exenatide was added to metformin, 1.0 kg when the drug was added to a sulfonylurea, and 0.9 kg when it was added to metformin plus a sulfonylurea. All patients began the treatment with 5  $\mu$ g injected twice daily sc, before the morning and evening meals, for the first month, followed by 10  $\mu$ g twice daily thereafter (166–168.) After 30 wk, a majority of the patients continued in an open-labeled extension for 82 wk.

A subset of 73 subjects from the exenatide plus metformin and exenatide plus metformin plus sulfonylurea groups had postprandial  $\beta$ -cell function evaluated at baseline and after 6 months (201). Glucose excursions after meal tolerance tests were significantly reduced after exenatide but not after placebo. To assess  $\beta$ -cell function independent of confounding effects from postprandial plasma glucose differences, mathematical modeling was performed incorporating three main components of  $\beta$ -cell function: rate sensitivity (early ISR), dose-response relating ISR to plasma glucose concentration (glucose sensitivity), and a potentiation factor, which is a function of time and may reflect the actions of nonglucose secretagogues along with other factors (202). The mathematical model indicated a greater insulin response for any glucose concentration. Also, exenatide increased potentiation at 2 h after a meal compared with placebo, presumably due to its incretin effect because it is only partially affected, whereas the  $\beta$ -cell function is inherently impaired in DM2 (203). In summary, exenatide enhanced postprandial  $\beta$ -cell function in patients with DM2 treated with metformin or metformin and sulfonylurea.

It was demonstrated that iv exenatide enhanced first- and second-phase insulin secretion in response to an iv glucose bolus in subjects with DM2 treated with diet/exercise, metformin, or acarbose and compared with healthy subjects with normal oral glucose tolerance test not receiving exenatide.

Exenatide-treated patients with DM2 had a similar secretory pattern (first- and second-phase insulin secretion) but higher insulin levels than healthy subjects, in contrast to patients with DM2 treated with placebo who had blunted first-phase insulin secretion compared with healthy controls. This effect is consistent with the ability of exenatide to improve  $\beta$ -cell function acutely (83).

**Liraglutide.** Liraglutide has 97% homology with GLP-1 and resists DPP-IV degradation by FA acylation and albumin binding (204). Single-dose kinetic studies in DM2 subjects revealed a half-life of  $10.0 \pm 3.5$  h, allowing for single daily-dose administration (205), whereas native GLP-1 with a very short half-life of  $1.5 \pm 0.35$  min has limited clinical value (206). It was demonstrated that bedtime administration of a single dose of liraglutide in well-controlled DM2 (compared with placebo) resulted in a significant reduction in fasting glucose while restoring  $\beta$ -cell responsiveness to physiological hyperglycemia, although  $\beta$ -cell function was grossly impaired in the absence of liraglutide (207). Once-daily dosing of 6  $\mu$ g/kg sc for 1 wk significantly reduced overall glycemia while improving first-phase insulin response to glucose and almost doubling the disposition index, with a fall in PI/IRI ratio along with diminishing glucagon levels and glycogenolysis, whereas gluconeogenesis was unaltered (208). At this dose, no effect on gastric emptying and no nausea were noted (184).

A phase II 14-wk study was performed to assess the efficacy and safety of liraglutide once-daily in 165 DM2 patients (HbA1c at randomization, 8.1–8.5%), drug-naïve or on single oral antidiabetic agent (washout for 4 wk) randomized to one of three doses of liraglutide (0.65, 1.25, or 1.9 mg) as monotherapy or placebo. Significant improvement in HbA1c was achieved in all actively treated groups *vs.* placebo, with an estimated difference *vs.* placebo of 1.74% at the highest dose. Dose-dependent weight reduction was achieved in the highest dose with the estimated change in body weight being  $-2.99$  kg from baseline (209).

To characterize  $\beta$ -cell function improvement by liraglutide, 24-h triple-meal tests were performed in 13 DM2 subjects, with liraglutide being administered for 7 d before tests. ISR was calculated from C-peptide deconvolution, and  $\beta$ -cell function was assessed using the mathematical model with three main components of  $\beta$ -cell function: 1) early (first-phase) ISR (rate sensitivity); 2) glucose sensitivity = dose-response curve; and 3) a potentiation factor (function of time, expressing relative ISR increase), as outlined previously (202). Modeling analysis indicated that rate sensitivity did not change significantly, but there was a marked effect on  $\beta$ -cell dose-response, which was shifted upward and became steeper (increase in glucose sensitivity). In addition, liraglutide stimulated potentiation during the first meal (210). In conclusion, liraglutide enhanced several  $\beta$ -cell function parameters, and the enhancement was correlated with the improvement in glycemic control. The mechanisms of liraglutide action, as expected, appear to be analogous to those exerted by endogenous incretins and incretin mimetics (201).

Rodent studies have indicated that liraglutide can increase  $\beta$ -cell mass in rat models of  $\beta$ -cell deficiency (male ZDF rats and in 60% pancreatectomized rats), but it may in part depend on the metabolic state of the animals, those with higher blood

glucose levels presenting greater  $\beta$ -cell mass (193). Furthermore, using primary neonatal rat islets, it was shown that native GLP-1 and liraglutide inhibited both cytokine- and FFA-induced apoptosis in a dose-dependent manner, thus playing a role in the maintenance of  $\beta$ -cell mass in diabetes (194).

To identify genes involved in the antiapoptotic activity of liraglutide, human islets freshly isolated from three cadaveric donors were treated with liraglutide for 22 h while the same number of untreated islets from the same donors served as a control. Microarray analysis, indicated that the expression of 96 genes was up-regulated, whereas the expression of 257 genes was down-regulated in the islets exposed to liraglutide. Of the genes with significant change in response to liraglutide, five were involved with cell proliferation; cell survival mechanisms and resistance to apoptosis were found to be increased 2-fold or more. The expression of four proapoptotic genes was also suppressed, and two genes related to inhibition of caspase were also down-regulated. It was concluded that liraglutide inhibits cell death in human isolated islets by regulating the expression profile of apoptosis-related genes (211).

In summary, liraglutide, can control diabetes by multiple actions through increasing insulin and lowering glucagon, yet it has a rapid and sustained glycemic effect and is associated with weight reduction. All actions are predictably strictly glucose-dependent, with low hypoglycemia risk and counterregulatory response to hypoglycemia not being impaired. Liraglutide may potentially delay disease progression, considering the  $\beta$ -cell function improvement in DM2 and  $\beta$ -cell mass shown to increase in animal models. Finally, it is well tolerated, with mild and transient gastrointestinal symptoms.

Table 3 indicates the overlapping and distinct properties of the two GLP-1R agonists exenatide and liraglutide, the former presently available and the latter in phase III evaluation, for the treatment of DM2 (212).

Table 4 shows the clinical evidence of incretin (GLP-1) and incretin mimetics (exendin-4 and liraglutide) effects on  $\beta$ -cell function in humans.

**Summary/conclusions.** Incretin hormones are peptides released from the gastrointestinal tract in response to nutrient ingestion to enhance glucose-dependent insulin secretion from the pancreas and aid in the overall maintenance of

glucose homeostasis through slowing of gastric emptying, inhibition of glucagon secretion, and control of body weight. The two major incretins are GLP-1 and GIP. GIP decreases gastric emptying to a much lesser degree and does not inhibit glucagon secretion, although it does exert a potent stimulatory effect in normal rodents and human  $\beta$ -cells, the diabetic  $\beta$ -cell being resistant to GIP action. Thus, the majority of efforts to develop incretin-based therapies are focused on GLP-1. The major component of the glycemic effect of GLP-1 or GLP-1R agonists, exendin-4 and the GLP-1 conjugated to albumin (liraglutide), is attributable to the inhibition of gastric emptying and glucagon secretion, with the glucagonostatic effect of GLP-1 and incretin mimetics being mediated via an endocrine effect on the  $\alpha$ -cell.

The acute effect of GLP-1 and GLP-1R agonists on  $\beta$ -cells in rodent models of diabetes and in cultured  $\beta$ -cells is stimulation of glucose-dependent insulin release, whereas the subacute effect is enhancing insulin biosynthesis and stimulation of insulin gene transcription. Their chronic action is stimulation of  $\beta$ -cell proliferation, induction of islet neogenesis from precursor ductal cells, and inhibition of  $\beta$ -cell apoptosis, thus promoting an expansion of  $\beta$ -cell mass.

The GLP-1R agonist, exenatide (synthetic exendin-4), exhibited similar actions to those of native GLP-1. The addition of exenatide to DM2 patients with unacceptable glycemic control while on metformin alone, sulfonylurea alone, or metformin plus sulfonylurea in 6-month placebo controlled trials demonstrated a placebo-adjusted decline of HbA1c and a placebo-adjusted weight loss.

Postprandial  $\beta$ -cell function evaluated in a subset of 73 subjects from exenatide plus metformin and exenatide plus metformin plus sulfonylurea groups, at baseline and after 6 months, using a mathematical model incorporating the three main components of  $\beta$ -cell function (rate sensitivity, glucose sensitivity, and potentiation factor), indicated that exenatide enhanced postprandial  $\beta$ -cell function, presumably due to its incretin effect in DM2. Furthermore, iv exenatide enhanced first- and second-phase insulin secretion in response to an iv glucose bolus in DM2 treated with diet/exercise, metformin, or acarbose.

Liraglutide has 97% homology with GLP-1 and resists DPP-IV degradation by FA acylation and albumin binding, with a half-life of  $10 \pm 3.5$  h, allowing for a single daily-dose administration, whereas native GLP-1 with a very short half-life of  $1.5 \pm 0.35$  min has limited clinical value. To characterize  $\beta$ -cell function improvement by liraglutide, 24-h triple meal tests were performed in DM2 after 1-wk liraglutide treatment, where insulin secretion was assessed by the mathematical model with three components of  $\beta$ -cell function showing an enhancement of several  $\beta$ -cell function parameters that correlated with improvement in glycemic control, analogous to the mechanisms exerted by endogenous incretins and incretin mimetics.

Rodent studies have indicated that liraglutide can increase  $\beta$ -cell mass in rat models of  $\beta$ -cell deficiency. This was demonstrated in human islets freshly isolated from three cadaveric donors treated with liraglutide, where microarray analysis indicated that liraglutide inhibited cell death by regulating the expression profile of apoptosis-related genes.

TABLE 3. Incretin mimetics: exenatide vs. liraglutide

|                                 | Exenatide              | Liraglutide             |
|---------------------------------|------------------------|-------------------------|
| Administration                  | Injection              | Injection               |
| Half-life (h)                   | $\approx 2\text{--}4$  | $\approx 12\text{--}14$ |
| Frequency of injection          | Twice daily            | Once daily              |
| Dose per injection              | 5–10 $\mu\text{g}$     | Up to 2 mg              |
| DPP-IV substrate?               | No                     | No                      |
| Insulin secretion <sup>a</sup>  | $\uparrow$             | $\uparrow$              |
| Glucagon secretion <sup>a</sup> | $\downarrow$           | $\downarrow$            |
| Fasting glucose                 | $\downarrow$           | $\downarrow$            |
| Weight reduction                | Yes                    | Yes                     |
| Gastric emptying                | $\downarrow$           | ( $\downarrow$ )        |
| Antibody production             | Yes ( $\approx 45\%$ ) | No                      |

Reproduced with permission from M. A. Nauck: Proc of the 66th Scientific Sessions, American Diabetes Association, June 11, 2006 (212).

<sup>a</sup> Glucose-dependent.

TABLE 4. Clinical evidence of incretin (GLP-1) and incretin mimetics (exendin-4 and liraglutide) effects on  $\beta$ -cell function in humans

| Peptide     | Administration                                                           | Ref. | Subject     | Findings                                                                                                                                                                                           |
|-------------|--------------------------------------------------------------------------|------|-------------|----------------------------------------------------------------------------------------------------------------------------------------------------------------------------------------------------|
| GLP-1       | Overnight + 2 h iv                                                       | 81   | DM2         | ↑ First and second phase insulin secretion                                                                                                                                                         |
|             | Extended (12 h) iv                                                       | 181  | IGT, DM2    | ↑ Ability of the $\beta$ -cell to sense and respond to subtle changes in plasma glucose (IGT > DM2)                                                                                                |
|             | Extended (5 h) iv                                                        | 180  | Normal, DM2 | ↑ First and second phase insulin secretion                                                                                                                                                         |
| Exendin-4   | Extended (5 h) iv                                                        | 83   | Normal, DM2 | ↑ First and second phase insulin secretion (greater than normal)                                                                                                                                   |
|             | 6 months sc exanetide + oral metformin or oral metformin + sulfonyleurea | 201  | DM2         | Postprandial $\beta$ -cell function<br>↑ Insulin response/any glucose level<br>↑ Potentiation at 2 h after meal (incretin effect)                                                                  |
| Liraglutide | 1 dose sc                                                                | 207  | DM2         | ↑ $\beta$ -cell sensitivity (graded glucose infusion)<br>↓ Proinsulin/insulin ratio<br>↑ Insulin secretion area (ISR) and slope of ISR <i>vs.</i> plasma glucose ( $\approx$ nondiabetic controls) |
|             | 1 wk sc (1 dose/d)                                                       | 208  | DM2         | Unchanged 24-h ISRs at lower plasma glucose<br>↑ First phase insulin response<br>↑ Disposition index <sup>a</sup><br>↓ Proinsulin/insulin ratio                                                    |
|             | 1 wk sc (1 dose/d)                                                       | 210  | DM2         | Postprandial $\beta$ -cell function (24 h triple meal tests)<br>↑ $\beta$ -cell dose response curve (↑ glucose sensitivity)<br>↑ Potentiation (relative ISR with time)–incretin effect             |
|             |                                                                          |      |             |                                                                                                                                                                                                    |

<sup>a</sup>  $S_i \times AIR_g$ .

2) *DPP-IV inhibitors (“incretin enhancers”).* The major therapeutic drawback of using native GLP-1 is its very short half-life of less than 2 min after exogenous administration, as previously indicated, due in part to the protease DPP-IV (157). A result, preventing the degradation of native GLP-1 by inhibiting the activity of the DPP-IV enzyme, has emerged as a therapeutic strategy for enhancing endogenous GLP-1 action *in vivo*.

DPP-IV is a ubiquitously expressed serine protease that exhibits postproline or alanine peptidase activity (213). The requisite for cleavage is that an alanine or a proline must be present as the second amino acid from the N-terminal end, in which case the two N-terminal amino acids are cleaved from the rest of the peptide. When this cleavage results in a loss of activity, such as with GLP-1 and GIP, DPP-IV acts as an inactivation enzyme. However, because exogenous GIP is comparatively less effective than GLP-1 at stimulating insulin secretion in DM2, whereas the insulinotropic action of GP-1 is well preserved, as shown earlier, much of the current research has focused on enhancing GLP-1 action for the treatment of DM2. However, it is possible that the effects of DPP-IV inhibition in diabetes are mediated by inhibition of bioactive peptides other than GLP-1. One puzzling finding might support this, as indicated by Ahrén (214): in patients with DM2, concentrations of active GLP-1 after meal ingestion are doubled by DPP-IV inhibition (compared with placebo), whereas glucose control improves (215). In contrast, when similar increases in GLP-1 levels are produced by exogenous infusion, there is little or no effect on insulin secretion or glucose levels (216). This suggests that mediators other than GLP-1 may contribute to the therapeutic effect of DPP-IV inhibition. Alternatively, recent findings indicate that GLP-1 may work indirectly through activation of the autonomic nervous system (217), an effect possibly mediated by local activation of afferent nerve terminals. If this proves to be an important mechanism, comparison of circulating levels of GLP-1 under different conditions becomes less rel-

evant because the key factor would be the local concentration of active GLP-1 in the vicinity of nerve terminals rather than the concentration in the circulation (218).

Concerning the potential mediators of the therapeutic effects of DPP-IV inhibition, Nauck and El-Ouaghli (218) presented five arguments suggesting that GLP-1 is not the only, or at least not the major, mediator of the glucose-lowering actions of DPP-IV inhibition observed in clinical studies (215, 219, 220); *i.e.*, DPP-IV inhibition: 1) causes little increase in circulating endogenous GLP; 2) has little effect on gastric emptying; 3) does not cause nausea/vomiting as do GLP-1 and incretin mimetics; 4) meal-stimulated GLP-1 fall; and 5) has delayed effects on glucose homeostasis (218). In the same issue of *Diabetologia*, Holst and Deacon (221) acknowledge these arguments but maintain that current evidence nonetheless supports the dominant role of GLP-1.

Table 5 summarizes the overlapping and distinct properties of GLP-1R agonists *vs.* DPP-IV inhibitors for the treatment of DM2 (222).

Ahrén (214) has suggested that neuropeptides, biologically active peptides localized to islet nerve terminals and functioning as neurotransmitters, may be substrates for DPP-IV (213), thus contributing to the actions of DPP-IV inhibitors in diabetes. Neuropeptides that are stored in islet nerve terminals and affect islet function would be of particular relevance in this regard, and the islet autonomic nervous system could be an important regulator of islet function (223). One neuropeptide of potential importance is pituitary adenylate cyclase-activating peptide (PACAP), which is localized to islet nerves and has several actions relevant to glucose homeostasis (224). Because PACAP is also a substrate for DPP-IV, it could contribute to the therapeutic benefits of DPP-IV inhibition recently shown in mice whereby PACAP-induced insulin secretion increased after inhibition of DPP-IV by valine pyrrolidide (225).

The potential risks associated with DPP-IV inhibitors include the prolongation of the action of other peptide hor-



TABLE 5. GLP-1R agonists *vs.* DPP-IV inhibitors

|                                                        | GLP-1R          | DPP-IV inhibitors |
|--------------------------------------------------------|-----------------|-------------------|
| Administration                                         | Injection       | Orally available  |
| GLP-1 concentrations                                   | Pharmacological | Physiological     |
| Mechanism of actions                                   | GLP-1           | GLP-1 + GIP       |
| Activation of portal glucose sensor                    | No              | Yes               |
| ↑ Insulin secretion                                    | +++             | +                 |
| ↓ Glucagon secretion                                   | ++              | ++                |
| Gastric emptying                                       | Inhibited       | +/-               |
| Weight loss                                            | Yes             | No                |
| Expansion of $\beta$ -cell mass in preclinical studies | Yes             | Yes               |
| Nausea and vomiting                                    | Yes             | No                |
| Potential immunogenicity                               | Yes             | No                |

Reproduced with permission from D. J. Druker: *Mechanisms in Medicine Inc.*, 2006 (222).

mones, neuropeptides, growth factors, cytokines, and chemokines cleaved by the protease (213) along with their interaction with DPP-IV-related proteases. Moreover, DPP-IV has effects beyond its proteolytic action, including T cell activation and proliferation. However, to date, side effects resulting from the prolongation of the action of messengers such as those related to inflammation, blood pressure, and allergic reactions from DPP-IV inhibition have not been observed in preclinical animal and clinical human studies (226).

In preclinical studies with normal and diabetic animals, several orally active DPP-IV inhibitors have been shown to increase plasma levels of intact, biologically active GLP-1 and GIP, resulting in stimulation of insulin and inhibition of glucagon secretion in a glucose-dependent manner as well as promotion of  $\beta$ -cell proliferation, neogenesis, and inhibition of apoptosis (198).

Several studies examining the efficacy of the two DPP-IV inhibitors sitagliptin (Januvia, Merck & Co., Whitehouse Station, NJ) and vildagliptin (Galvus, Novartis, East Hanover, NJ) in the treatment of DM2 are now on phase III trials and will be reviewed below.

*Sitagliptin (MK-0431).* A preclinical study has demonstrated that 8–12 wk of treatment of diabetic mice with an analog of sitagliptin (des-fluoro-sitagliptin) produced restoration of  $\beta$ -cell mass and morphology, increased islet insulin content, and improved glucose-stimulated insulin secretion in isolated islets, similar to that observed in preclinical studies after administration of GLP-1 or GLP-1R analogs (227).

Single doses of 100 mg or higher, with an apparent half-life of 8–14 h, resulted in inhibition of plasma DPP-IV activity over 24 h by at least 80%. Sitagliptin increased the meal-associated rise in active plasma GLP-1 concentration by approximately 2-fold without causing hypoglycemia (228). Therefore, sitagliptin possesses pharmacokinetic and pharmacodynamic characteristics that support a once-daily dosing regimen, stimulating insulin secretion, inhibiting glucagon secretion, and reducing glycemic excursions after an oral glucose load in mild DM2 (229).

There are recent reports from the ongoing phase III program with sitagliptin involving three large studies. In one study, sitagliptin monotherapy reduced significantly HbA1c and improved glycemic control in the fasting and postprandial state after 24 wk in 741 patients with DM2, randomized to placebo or sitagliptin. Postmeal insulin and C-peptide AUC, ratio of insulin AUC/glucose AUC, and HOMA- $\beta$ ,

which are all measures of  $\beta$ -cell function, were significantly increased with sitagliptin relative to placebo. Moreover, PI/IRI ratio was significantly reduced with sitagliptin compared with placebo (230). In another study, when sitagliptin was added to ongoing metformin therapy administered to 701 patients with DM2 and inadequate glycemic control on metformin who were randomized to receive either placebo or sitagliptin, a significant reduction in HbA1c, fasting plasma glucose, and 2-h postmeal plasma glucose was observed after 24 wk. The same indices of  $\beta$ -cell function, evaluated as in the above indicated report, were also significantly increased, and the PI/IRI ratio was significantly decreased with sitagliptin relative to placebo (231).

The effect of sitagliptin on  $\beta$ -cell function in DM2 was assessed using frequently sampled (9 points) meal tolerance tests in substudies from three phase III trials (two monotherapy studies and an add-on to metformin study) using the C-peptide minimal model, which allowed for the estimation of the ISR and the characterization of the insulin secretion response into basal ( $\beta$ -cell responsiveness to basal glucose concentrations), static ( $\beta$ -cell responsiveness to above-basal glucose concentrations after a meal), and dynamic ( $\beta$ -cell responsiveness to the rate of increase in above-basal glucose concentrations after a meal) components. Insulin sensitivity was assessed with a validated composite index. The disposition indices were also assessed. When used as monotherapy or added to ongoing metformin therapy, sitagliptin produced improvements in basal and static components and overall responsiveness to the  $\beta$ -cell to glucose. The dynamic component showed numerical, but not statistically significant, improvements with sitagliptin. Disposition indices were also broadly improved with the DPP-IV inhibitor relative to placebo. Despite enhanced  $\beta$ -cell sensitivity to glucose, the low rate of hypoglycemia observed in clinical trials with sitagliptin indicated, according to the authors, that the increase in  $\beta$ -cell function remained glucose-dependent (232).

Finally, the addition of sitagliptin to 353 DM2 patients who were not well-controlled with pioglitazone monotherapy and were randomized to placebo or sitagliptin (100 mg/d) to ongoing pioglitazone produced a significant placebo-subtracted reduction in HbA1c over 24 wk, maintaining the glycemic control over the study period. Proinsulin levels and PI/IRI ratio were significantly reduced with sitagliptin compared with placebo, suggesting improvement in  $\beta$ -cell function without additional weight gain (233).

*Vildagliptin (LAF-237)*. In preclinical studies, the ability of vildagliptin to augment  $\beta$ -cell mass by enhancing endogenous incretin action was assessed in neonatal rats, a model for rapid  $\beta$ -cell turnover and growth. Neonatal rats were treated once daily with vildagliptin or vehicle (control) for 21 d. Vildagliptin increased the number of replicating islet cells significantly and reduced the number of apoptotic islet cells. Additionally, there was a significant increase in pancreatic insulin content and  $\beta$ -cell mass even 1 wk after discontinuation of treatment (234). The head-to-head comparison of vildagliptin with injectable exenatide on *in vivo*  $\beta$ -cell regulation in streptozotocin-induced  $\beta$ -cell injury in mice demonstrated that both drugs are equally effective in reducing the streptozotocin-induced proliferative response, a protective effect against  $\beta$ -cell injury as well as in promoting early differentiation of pancreatic progenitor cells, in increasing formation of ductal  $\beta$ -cell and improving glucose tolerance to a similar extent in streptozotocin-diabetic mice. Furthermore, the effect was maintained after the treatment washout (235).

In clinical studies with vildagliptin, postmeal glucose levels were significantly decreased, but postmeal insulin levels were unchanged (220). Although such findings might be interpreted to suggest that DPP-IV inhibitors do not improve insulin secretion in patients with DM2, it should be recognized that circulating insulin levels are not a direct measure of insulin secretion and that insulin secretion must be considered in the context of ambient glucose levels. Accordingly,  $\beta$ -cell function can be improved without appreciable changes in circulating insulin levels, particularly if glucose values are reduced (236). The effect of 4-wk treatment with vildagliptin (100 mg, twice daily) on meal-related  $\beta$ -cell function was examined in drug-naïve patients with DM2, using the mathematical model previously presented, which derives multiple parameters of  $\beta$ -cell function relating ISRs and glucose levels ( $\beta$ -cell dose response), change in glucose with time (derivative component), and a potentiating factor (201). Vildagliptin was found to improve  $\beta$ -cell function by increasing insulin secretion at any given glucose level (secretory tone), whereas the slope of the  $\beta$ -cell dose response, the derivative component, and the potentiation factor were not affected. This would suggest that insulin secretion at a given glucose concentration is augmented by vildagliptin (236). The same type of study was performed over 52 wk in metformin-treated DM2 subjects (inadequately compensated). Patients were randomized to either metformin and placebo or metformin and vildagliptin, 50 mg once daily (237). Meal tests were performed at study commencement and again after 12, 24, and 52 wk to evaluate meal-related  $\beta$ -cell function, calculating several parameters: the insulin secretion; insulin sensitivity during meal ingestion (238); the adaptation index, which gives a figure for the ability of the  $\beta$ -cell to adapt insulin secretion to the ambient insulin sensitivity (insulin secretion  $\times$  insulin sensitivity) (239). Administration of metformin and vildagliptin for 52 wk was associated with reduced fasting and postprandial plasma glucose (with a sustained highly significant reduction in HbA1c), enhanced postprandial insulin secretion, increased dynamic insulin sensitivity in relation to meal intake compared to fasting (static) insulin sensitivity and adaptation index, and a re-

duced PI/IRI ratio compared with baseline values. In contrast, for the metformin-placebo-treated groups, fasting plasma glucose increased (as well as HbA1c values), postmeal insulin secretion and adaptation index decreased, but insulin sensitivity during meal ingestion was not altered, and no net change was observed for the PI/IRI ratio (237).

Although vildagliptin improves  $\beta$ -cell function and reduces fasting and postprandial glucose in patients with DM2, it did not increase absolute postmeal insulin levels either during 4–12 wk of treatment in patients with DM2, as described above, or after a single dose given before a 75-g oral glucose tolerance test in healthy subjects (240). In diet-treated DM2 patients, an acute insulinotropic effect of vildagliptin (100 mg) was observed only when an oral glucose load (75 g) provided an intense glucose stimulus for insulin secretion when compared with a standard breakfast meal test (incremental glucose AUC  $\sim$ 5-fold greater) (241).

Regarding the mechanisms by which a single-dose administration of vildagliptin (100 mg) before a mixed evening meal improves glucose tolerance and reduces fasting plasma glucose in DM2, it was shown that increasing ISR, despite a significant reduction in plasma glucose (increase in insulinogenic index) and suppressing plasma glucagon, leads to enhanced suppression of endogenous glucose production. During the overnight period, endogenous glucose production was significantly reduced, and its decline was positively correlated with the decrease in fasting plasma glucose (242). It was demonstrated that 12-wk treatment of drug-naïve DM2 with vildagliptin (50 mg twice daily), compared with placebo, restored the  $AIR_g$  and the  $S_i$  determined during FSIVGTT. The disposition index ( $AIR_g \times S_i$ ) increased more than 4-fold where part of this effect remained after a 2- to 4-wk washout, suggesting that vildagliptin may exert some disease-modifying effect (243).

Recently, some results from ongoing phase III programs with vildagliptin have been presented in the same line described in the sitagliptin section. One study comprising 780 patients compared vildagliptin monotherapy (50 mg twice daily) with metformin. After 52 wk, HbA1c levels were reduced significantly with both drugs. Vildagliptin was better tolerated than metformin. Both treatments were weight neutral (244). In a second study comprising 416 patients, vildagliptin (50 mg once or twice daily) or placebo was added to metformin, improving glycemic control when the incretin enhancer was given in comparison to placebo in a 24-wk study. Vildagliptin was well-tolerated and mitigated metformin-induced gastrointestinal side effects whenever present (245).

A third study comprised 256 patients and compared vildagliptin with placebo in inadequately controlled DM2 requiring insulin. After 24 wk, vildagliptin 100 mg/d plus insulin reduced insulin requirements and HbA1c slightly more in comparison with the patients treated with placebo plus insulin. The hypoglycemic events were less common and less severe in the vildagliptin-treated patients (246).

Although sitagliptin is not quite as potent as vildagliptin, the available data from single-dose studies indicate that both compounds have similar clinical efficiency in reducing glucose excursion after oral glucose administration (247). Data are not yet available to enable comparison of the efficacies of

both DPP-IV inhibitors following chronic dosing. Preclinical data suggest that sitagliptin may have a longer duration of action than vildagliptin, since its half-life in monkeys is >2-fold longer than that of vildagliptin. Thus, in clinical trials with vildagliptin as monotherapy a twice daily dosing has been used while therapy with sitagliptin an once daily dosing regimen should be indicated. Enzyme inhibitory data released has shown that sitagliptin has more selectivity for DPP-IV than vildagliptin. If sitagliptin is superior to vildagliptin in this respect, the biological consequences of inhibiting DPP-IV related enzymes remains poorly understood. However, inhibition of DPP VIII/IX may be associated with considerable toxicity in preclinical studies (247, 248). Given the absence of serious side effects in clinical studies either with sitagliptin or vildagliptin, any differences in selectivity between inhibitors is likely to be of more academic, rather than clinical importance (247).

In Table 6 are shown the effects of incretin enhancers on  $\beta$ -cells in animal studies. Table 7 shows the clinical evidence of the effects on  $\beta$ -cell function in humans with DM2.

**Summary/conclusions.** Preventing the degradation of native GLP-1 by inhibiting the activity of the DDP-IV enzyme has emerged as a therapeutic strategy for enhancing endogenous GLP-1 action *in vivo*. The effects of DPP-IV inhibition could be mediated not only by GLP-1 but also by other mediators of the glucose-lowering actions of DPP-IV inhibition in clinical studies because it causes little increase in circulating endogenous GLP-1, has little effect on gastric emptying, does not cause nausea/vomiting like GLP-1 and GLP-1R agonists, and is not associated with weight loss. In preclinical studies, oral active DDP-IV inhibitors have been demonstrated to promote  $\beta$ -cell proliferation, neogenesis, and inhibition of apoptosis in rodents similar to that observed after the administration of GLP-1 or GLP-1R agonists.

In contrast with GLP-1R agonists, which are administered via injection, the DPP-IV inhibitors, sitagliptin and vildagliptin, accepted for review by the U.S. Food and Drug Administration, are administered orally and are well tolerated. Major adverse effects have not been reported in clinical trials examining the efficacy of DPP-IV inhibitors for the treatment of DM2.

In healthy subjects, a single dose of 100 mg or higher of sitagliptin resulted in inhibition of plasma DDP-IV activity over 24 h by at least 80%, increasing a meal-associated rise in active plasma GLP-1 levels 2-fold without hypoglycemia. Phase III studies with sitagliptin plus ongoing metformin and sitagliptin plus ongoing pioglitazone have indicated an improvement in HbA1c and glycemic control as well as post-meal indices of  $\beta$ -cell function. The effect of sitagliptin on

$\beta$ -cell function, assessed by frequently sampled meal tolerance tests in three substudies from phase III using the C-peptide minimal model, showed improvement in  $\beta$ -cell responsiveness to basal and above-basal glucose concentration components after the meals. The dynamic component ( $\beta$ -cell responsiveness to the rate of increase in above-basal glucose levels after a meal) showed numerical but not significant improvements with sitagliptin. Disposition indices were also improved.

Preclinical studies have demonstrated that vildagliptin increased  $\beta$ -cell mass by increasing the number of replicating islet cells and reducing the number of apoptotic islet cells as assessed in neonatal rats, a model for rapid  $\beta$ -cell turnover and growth. The head-to-head comparison of vildagliptin with exenatide in a mouse model of streptozotocin-induced  $\beta$ -cell injury showed that both had a protective effect against  $\beta$ -cell injury, promoted early differentiation of pancreatic progenitor cells, and increased formation of ductal  $\beta$ -cells, improving glucose tolerance with the effect being maintained after the treatment washout.

Although vildagliptin reduced postprandial glucose in DM2, it did not increase postmeal insulin levels during 4–12 wk of treatment. In diet-treated DM2, oral glucose load (75 g) provided an intense glucose stimulus for insulin secretion when compared with a standard breakfast meal test. In drug-naive patients, 4-wk treatment with vildagliptin (100 mg twice daily) improved  $\beta$ -cell function by increasing insulin secretion at any glucose level, whereas the slope of  $\beta$ -cell dose response and the potentiation factor were not affected using a mathematical model. In a similar study over 52 wk of vildagliptin added to metformin-treated DM2, an improvement was demonstrated in  $\beta$ -cell function, with enhanced postprandial insulin secretion and increased insulin sensitivity and disposition index. Twelve-week treatment of drug-naive DM2 with vildagliptin (50 mg twice daily) restored the  $AIR_g$  and  $S_i$  determined by FSIVGTT. The disposition index ( $AIR_g \times S_i$ ) increased >4-fold, and part of its effect remained after a 2- to 4-wk washout, suggesting that vildagliptin may exert some disease-modifying effect. Three recent studies have been carried out in the same line as for sitagliptin. One study compared vildagliptin (50 mg twice daily) monotherapy with metformin over 52 wk, with better sustained control with the DPP-IV inhibitor. In the second study, vildagliptin (50 mg daily or twice daily) was added to metformin, with improvement of glycemic control slightly better with the larger dose. The third study compared vildagliptin (100 mg daily) with placebo in insulin-requiring DM2. After 24 wk, there was a reduction in HbA1c and in the mean insulin doses.

TABLE 6. Effects of incretin enhancers (sitagliptin and vildagliptin) on  $\beta$ -cells: animal studies

| Experimental model           | Ref. | Incretin enhancer         | $\beta$ -cell                                                                                                                                            |
|------------------------------|------|---------------------------|----------------------------------------------------------------------------------------------------------------------------------------------------------|
| Diabetic mice                | 227  | Des-fluoro-sitagliptin    | $\uparrow$ $\beta$ -cell mass<br>$\uparrow$ Ratio of insulin positive $\beta$ -cell/total islet area<br>Restoration of $\beta/\alpha$ -cell distribution |
| Neonatal rats                | 234  | Vildagliptin              | $\uparrow$ Replication<br>$\downarrow$ Apoptosis<br>$\uparrow$ $\beta$ -cell mass                                                                        |
| Streptozotocin-diabetic mice | 235  | Vildagliptin<br>Exenatide | $\uparrow$ Glucose tolerance<br>$\uparrow$ Differentiation of progenitor ductal cells $\rightarrow$ $\uparrow$ ductal $\beta$ -cell                      |



TABLE 7. Clinical evidence of incretin enhancer (sitagliptin and vildagliptin) effects on  $\beta$ -cell function in humans with DM2

| Peptide      | Added medication                       | Ref. | Findings                                                                                                                                                                                                                                                                                                                               |
|--------------|----------------------------------------|------|----------------------------------------------------------------------------------------------------------------------------------------------------------------------------------------------------------------------------------------------------------------------------------------------------------------------------------------|
| Sitagliptin  | Monotherapy (24 wk)                    | 230  | Postmeal<br>↑ Insulin and C-peptide AUC<br>↑ Ratio insulin AUC/glucose AUC<br>↑ HOMA- $\beta$<br>↓ PI/IRI ratio                                                                                                                                                                                                                        |
|              |                                        | 231  | Postmeal<br>↑ Insulin and C-peptide AUC<br>↑ Ratio insulin AUC/glucose AUC<br>↑ HOMA- $\beta$<br>↓ PI/IRI ratio                                                                                                                                                                                                                        |
|              |                                        | 232  | Postprandial $\beta$ -cell function<br>↑ $\beta$ -cell responsiveness to basal glucose<br>↑ $\beta$ -cell responsiveness to above-basal glucose after meal<br>↑ Disposition index <sup>a</sup>                                                                                                                                         |
| Vildagliptin | Monotherapy (4 wk)                     | 236  | Postmeal $\beta$ -cell function<br>↑ Insulin secretion at any given glucose level<br>No change in slope of $\beta$ -cell dose response and other model parameters                                                                                                                                                                      |
|              | + Metformin or metformin alone (52 wk) | 237  | Postmeal $\beta$ -cell function<br>Vildagliptin + metformin: ↑ postprandial insulin secretion, ↑ insulin sensitivity to meal intake, ↑ adaptation index (insulin secretion × insulin sensitivity)<br>Placebo + metformin: ↓ postprandial insulin secretion and ↓ adaptation index. No change in insulin sensitivity during meal intake |
|              | Monotherapy (12 wk)                    | 243  | FSIVGTT<br>↑ AIR <sub>g</sub> , ↑ S <sub>i</sub><br>↑ Disposition index <sup>a</sup>                                                                                                                                                                                                                                                   |

<sup>a</sup> S<sub>i</sub> × AIR<sub>g</sub>.

Single-dose studies indicate that sitagliptin and vildagliptin have similar clinical efficiency in reducing the glucose excursion after oral glucose. Data are not yet available to enable comparison of the efficacies of both products in chronic use.

*d. Potential effects on preservation and augmentation of  $\beta$ -cell mass.* Regarding the most important question concerning both GLP-1 analogs, GLP-1R activators and DPP-IV inhibitors (incretin enhancers), incretin mimetics, is whether they will be able to slow or prevent the apparently inevitable progress of the DM2, considering their trophic effects on  $\beta$ -cells (249), not only stimulating their proliferation (185, 250) but also enhancing the differentiation of new  $\beta$ -cells from progenitor cells in the pancreatic duct epithelium (251) and, perhaps most importantly, being capable of inhibiting apoptosis of the  $\beta$ -cells including human  $\beta$ -cells (195). Because the normal number of  $\beta$ -cells is maintained in a balance between apoptosis and proliferation, the protective effects of incretin mimetics could be relevant under conditions in which  $\beta$ -cell apoptosis is increased, such as in DM2 (4). Because, for obvious reasons, it is difficult to estimate the protective effects of incretin mimetics on  $\beta$ -cells in humans, there is no clinical evidence that these drugs really have protective effects on  $\beta$ -cells (252). Furthermore, the rate at which  $\beta$ -cell proliferation occurs in humans is not known. Thus, will incretin mimetics protect  $\beta$ -cells or promote their regeneration in clinical use, as appears to be the case in animal studies (157)? A question put forward by Holst in his Claude Bernard Lecture 2005 to the European Association for the Study of Diabetes (252) is how long should one wait for such effects to unfold? Nevertheless, there are two observations addressing this question that were put forward by Holst (252). In the study in which vildagliptin was admin-

istered for 52 wk to patients inadequately treated with metformin, subjects showed a sustained improvement in HbA1c, whereas an increase was observed in the control group (215). Similarly, over 82 wk of treatment with exenatide, HbA1c levels remained constant at approximately 7% (253) although, according to the UKPDS, an increase would have been expected over this time span. These sustained effects could be the first indication that incretin mimetics have  $\beta$ -cell protective effects that persist after the plateau, reached 3 to 4 months after initiation of therapy, suggesting that continued exposure to incretin mimetics is required for further improvements in metabolic control. At any rate, these observations, according to Holst (252), tell us that incretin mimetics should be started as early in the clinical course as possible, before  $\beta$ -cell function has deteriorated to unacceptable levels.

Incretin mimetics may exert an indirect effect on  $\beta$ -cell mass by reducing hyperglycemia, which, as indicated before, can cause  $\beta$ -cell dysfunction and apoptosis. Another effect on  $\beta$ -cell mass could be the result of a nonspecific growth factor effect of augmented insulin supply itself (254). A direct effect on  $\beta$ -cell mass has been demonstrated, at least in rodents, by stimulating both  $\beta$ -cell replication and neogenesis and inhibiting cell apoptosis, thus increasing  $\beta$ -cell mass. Because GLP-1R is found in pancreatic ducts, a presumed site of origin of  $\beta$ -cell precursors (162), neogenesis is probably derived from these precursors (Fig. 4).

Regarding glucagon secretion (254), there is abundant evidence that hyperglucagonemia plays a role in the development of hyperglycemia in DM2, contributing to an excessive glucose production by the liver through its action in association with a reduced insulin secretion. However, the efforts to understand and correct the abnormal glucagon secretion

FIG. 4. Pathways supposedly involved in insulin secretion and  $\beta$ -cell mass increase by the action of incretin mimetics.

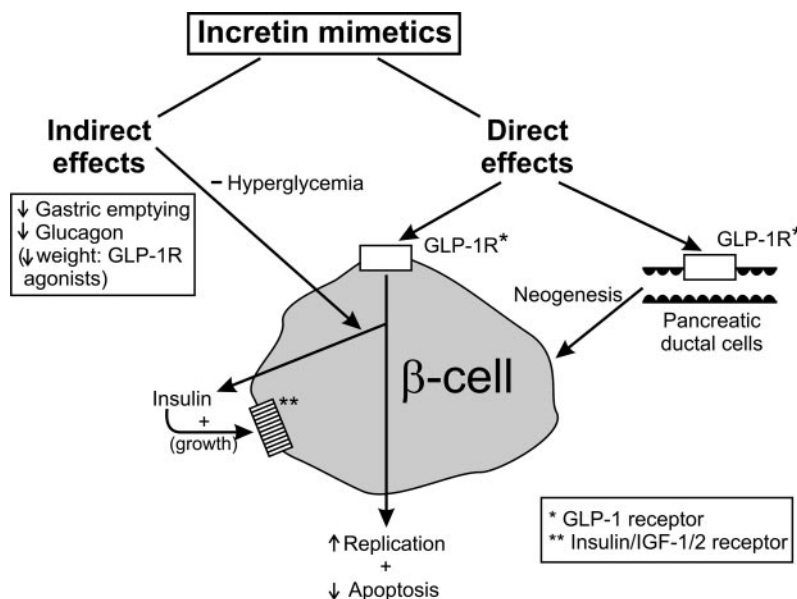

have been overshadowed by the emphasis on insulin secretion and action. The recognition that GLP-1 and mimetics exert opposing effects on glucagon and insulin secretion has revived interest in glucagon, the neglected partner in the “bihormonal hypothesis” proposed by Unger and Orci 30 yr ago to explain the origin of hyperglycemia in diabetes (255). The defect in the  $\alpha$ -cell function that occurs in DM2 reflects impaired glucose sensing, which contributes to the increased rate of hepatic glucose output in DM2. Another manifestation of impaired glucose sensing by the  $\alpha$ -cell is the loss of hyperglycemia-induced suppression of glucagon release. Besides, a very important aspect of  $\alpha$ -cell dysfunction in diabetes is a failure to respond appropriately to hypoglycemia (256). GLP-1 and incretin mimetics inhibit glucagon secretion, and this action may be as important as its insulinotropic effect in terms of its therapeutic properties. Most of the limited available evidence is consistent with the notion that GLP-1 improves  $\alpha$ -cell glucose sensing in DM2, but the  $\alpha$ -cell response to incipient hypoglycemia is not suppressed by GLP-1. Furthermore, the ability of GLP-1 and mimetics to suppress glucagon secretion in patients with DM2 appears to be maintained with chronic treatment (256, 257).

The recent description of hyperinsulinemic hypoglycemia and nesidioblastosis together with increased circulating levels of GLP-1 in a few patients after gastric bypass surgery emphasizes the importance of understanding the long-term consequences of prolonged activation of GLP-1 receptors in human subjects (182, 258).

### Acknowledgments

Address all correspondence to: Bernardo L. Wajchenberg, Diabetes and Heart Center of The Heart Institute, Hospital das Clínicas of The University of São Paulo Medical School, Av. Eneas C. Aguiar 44, Bloco II, AB São Paulo, SP 05403-000, Brazil. E-mail: bernarwaj@globo.com.

### References

1. UK Prospective Diabetes Study (UKPDS) Group 1998 Intensive blood-glucose control with sulphonylureas or insulin compared with conventional treatment and risk of complications in patients with type 2 diabetes (UKPDS 33). *Lancet* 352:837–853
2. UK Prospective Diabetes Study (UKPDS) Group 1998 Effect of intensive blood-glucose control with metformin on complications in overweight patients with type 2 diabetes (UKPDS 34). *Lancet* 352:854–865
3. Holman RR 1998 Assessing the potential for  $\alpha$ -glucosidase inhibitors in prediabetic states. *Diabetes Res Clin Pract* 40 (Suppl):S21–S25
4. Butler AE, Janson J, Bonner-Weir S, Ritzel R, Rizza RA, Butler PC 2003  $\beta$ -Cell deficit and increased  $\beta$ -cell apoptosis in humans with type 2 diabetes. *Diabetes* 52:102–110
5. Wallace TM, Levy JC, Matthews DR 2004 Use and abuse of HOMA modeling. *Diabetes Care* 27:1487–1495
6. Matthews DR 2001 Insulin resistance and  $\beta$ -cell function—a clinical perspective. *Diabetes Obes Metab* 3(Suppl 1):S28–S33
7. UK Prospective Diabetes Study (UKPDS) Group 1995 Overview of 6 years’ therapy of type II diabetes: a progressive disease (UKPDS 16). *Diabetes* 44:1249–1258
8. Östgren CJ, Lindblad U, Ranstam J, Melander A, Rastam L 2002 Glycaemic control, disease duration and  $\beta$ -cell function in patients with type 2 diabetes in a Swedish community. Skaraborg Hypertension and Diabetes Project. *Diabet Med* 19:125–129
9. Matthews DR, Hosker JP, Rudenski AS, Naylor BA, Teacher DF, Turner RC 1985 Homeostasis model assessment: insulin resistance and  $\beta$ -cell function from fasting plasma glucose and insulin concentrations in man. *Diabetologia* 28:412–419
10. Bergman RN 1989 Toward physiological understanding of glucose tolerance. Minimal-model approach. Lilly lecture. *Diabetes* 38:1512–1527
11. Stumvoll M, Tataranni A, Stefan N, Vozarova B, Bogardus C 2003 Glucose allostasis. *Diabetes* 52:903–909
12. Boden G, Shulman GI 2002 Free fatty acids in obesity and type 2 diabetes: defining their role in the development of insulin resistance and  $\beta$ -cell dysfunction. *Eur J Clin Invest* 32:14–23
13. Pratley RE, Weyer C 2001 The role of impaired early insulin secretion in the pathogenesis of type II diabetes mellitus. *Diabetologia* 44:929–945
14. Weyer C, Bogardus C, Mott DM, Pratley RE 1999 The natural history of insulin secretory dysfunction and insulin resistance in

- the pathogenesis of type 2 diabetes mellitus. *J Clin Invest* 104:787–794
15. **Gerich JE** 2003 Contributions of insulin resistance and insulin-secretory defects to the pathogenesis of type 2 diabetes mellitus. *Mayo Clin Proc* 78:447–456
  16. **Elbein SC, Hasstedt SJ, Wegner K, Kahn SE** 1999 Heritability of pancreatic  $\beta$ -cell function among nondiabetic members of Caucasian familial type 2 diabetic kindreds. *J Clin Endocrinol Metab* 84:1398–1403
  17. **Elbein SC, Wegner K, Kahn SE** 2000 Reduced  $\beta$ -cell compensation to the insulin resistance associated with obesity in members of Caucasian familial type 2 diabetic kindreds. *Diabetes Care* 23:221–227
  18. **Wajchenberg BL** 2000 Subcutaneous and visceral adipose tissue: their relation to the metabolic syndrome. *Endocr Rev* 21:697–738
  19. **Gerich JE** 1998 The genetic basis of type 2 diabetes mellitus: impaired insulin secretion versus impaired insulin sensitivity. *Endocr Rev* 19:491–503
  20. **Gerich JE** 2000 Clinical perspective: insulin resistance is not necessarily an essential component of type 2 diabetes. *J Clin Endocrinol Metab* 85:2113–2115
  21. **Donath MY, Halban PA** 2004 Decreased  $\beta$ -cell mass in diabetes: significance, mechanisms and therapeutic implications. *Diabetologia* 47:581–589
  22. **Kahn SE** 1996 Regulation of  $\beta$ -cell function in vivo: from health to disease. *Diabetes Rev* 4:372–389
  23. **Roder ME, Porte DJ, Schwartz RS, Kahn SE** 1998 Disproportionately elevated proinsulin levels reflect the degree of impaired  $\beta$ -cell secretory capacity in patients with noninsulin-dependent diabetes mellitus. *J Clin Endocrinol Metab* 83:604–608
  24. **Gerich JE** 2002 Is reduced first-phase insulin release the earliest detectable abnormality in individuals destined to develop type 2 diabetes? *Diabetes* 51(Suppl 1):S117–S121
  25. **Mitrakou A, Kelley D, Mokan M, Veneman T, Pangburn T, Reilly J, Gerich JE** 1992 Role of reduced suppression of glucose production and diminished early insulin release in impaired glucose tolerance. *N Engl J Med* 326:22–29
  26. **Bergstrom RW, Wahl PW, Leonetti DL, Fujimoto WY** 1990 Association of fasting glucose levels with delayed secretion of insulin after oral glucose in subjects with glucose intolerance. *J Clin Endocrinol Metab* 71:1447–1453
  27. **Polonsky KS, Given BD, Hirsch LJ, Tillil H, Shapiro ET, Beebe C, Frank BH, Galloway JA, Van Cauter E** 1988 Abnormal patterns of insulin secretion in non-insulin-dependent diabetes mellitus. *N Engl J Med* 318:1231–1239
  28. **Sturis J, Polonsky KS, Shapiro ET, Blackman JD, O'Meara NM, Van Cauter E** 1992 Abnormalities in the ultradian oscillations of insulin secretion and glucose levels in type II (non-insulin-dependent) diabetic patients. *Diabetologia* 35:681–689
  29. **O'Meara NM, Sturis J, Van Cauter E, Polonsky KS** 1993 Lack of control by glucose of ultradian insulin secretory oscillations in impaired glucose tolerance and non-insulin-dependent diabetes mellitus. *J Clin Invest* 92:262–271
  30. **Lang DA, Matthews DR, Burnett M, Turner RC** 1981 Brief, irregular oscillations of basal plasma insulin and glucose concentrations in diabetic man. *Diabetes* 30:435–439
  31. **O'Rahilly S, Turner RC, Matthews DR** 1988 Impaired pulsatile secretion of insulin in relatives of patients with non-insulin-dependent diabetes. *N Engl J Med* 318:1225–1230
  32. **Ritzel R, Schulte M, Porksen N, Nauck MS, Holst JJ, Juhl C, März W, Schmitz O, Schmiegel WH, Nauck MA** 2001 Glucagon-like peptide 1 increases secretory burst mass of pulsatile insulin secretion in patients with type 2 diabetes and impaired glucose tolerance. *Diabetes* 50:776–784
  33. **Porksen N** 2002 The in vivo regulation of pulsatile insulin secretion. *Diabetologia* 45:3–20
  34. **Pick A, Clark J, Kubstrup C, Levisetti Mpugh W, Bonner-Weir S, Polonsky KS** 1998 Role of apoptosis in failure of  $\beta$ -cell mass compensation for insulin resistance and  $\beta$ -cell defects in the male Zucker diabetic fatty rat. *Diabetes* 47:358–364
  35. **Sakuraba B, Mizukami H, Yagihashi N, Wada R, Hanyu C, Yagihashi S** 2002 Reduced  $\beta$ -cell mass and expression of oxidative stress-related DNA damage in the islet of Japanese type II diabetes mellitus. *Diabetologia* 45:85–96
  36. **Yoon KH, Ko SH, Cho JH, Lee JM, Ahn YB, Song KH, Yoo SJ, Kang MI, Cha BY, Lee KW, Son HY, Hang SK, Kim HS, Lee IK, Bonner-Weir S** 2003 Selective  $\beta$ -cell loss and  $\alpha$ -cell expansion in patients with type 2 diabetes mellitus in Korea. *J Clin Endocrinol Metab* 88:2300–2308
  37. **Trautmann M**,  $\beta$ -Cell dysfunction in type 2 diabetes. Continued Medical Education Program, Eli Lilly. Salvador, Bahia, Brazil, November 10, 2005
  38. **Klöppel G, Löhr M, Habich K, Oberholzer M, Heitz PU** 1985 Islet pathology and the pathogenesis of type 1 and type 2 diabetes mellitus revisited. *Surg Synth Pathol Res* 4:110–125
  39. **Clark A, Wells CA, Buley ID, Cruickshank JK, Vanhegan RI, Matthews DR, Cooper GJ, Holman RR, Turner RC** 1988 Islet amyloid, increased A-cells, reduced B-cells and exocrine fibrosis: quantitative changes in the pancreas in type 2 diabetes. *Diabetes Res* 9:151–159
  40. **Guiot Y, Sempoux C, Moulin P, Rahier J** 2001 No decrease of  $\beta$ -cell mass in type 2 diabetic patients. *Diabetes* 50(Suppl 1):S188
  41. **Rorsman P** 2005 Insulin secretion: function and therapy of pancreatic  $\beta$ -cells in diabetes. *Br J Diabetes Vasc Dis* 5:187–191
  42. **Kaiser N, Leibovitz G, Nesher R** 2003 Glucotoxicity and  $\beta$ -cell failure in type 2 diabetes mellitus. *J Pediatr Endocrinol Metab* 16:5–22
  43. **Donath MY, Gross DJ, Cerasi E, Kaiser N** 1999 Hyperglycemia-induced  $\beta$ -cell apoptosis in pancreatic islets of *Psammomys obesus* during development of diabetes. *Diabetes* 48:738–744
  44. **Maedler K, Spinas GA, Lehmann R, Sergeev P, Weber M, Fontana A, Kaiser N, Donath MY** 2001 Glucose induces  $\beta$ -cell apoptosis via upregulations of the Fas-receptor in human islets. *Diabetes* 50:1683–1690
  45. **Efanova IB, Zaitsev SV, Zhivotovsky B, Köhler M, Efendic S, Orrenius S, Berggren P-O** 1998 Glucose and tolbutamide induce apoptosis in pancreatic  $\beta$ -cells. A process dependent on intracellular  $Ca^{2+}$  concentration. *J Biol Chem* 273:33501–33507
  46. **Donath MY, Ehses JA, Maedler K, Schumann DM, Ellingsgaard H, Eppler E, Reinecke M** 2005 Mechanisms of  $\beta$ -cell death in type 2 diabetes. *Diabetes* 54(Suppl 2):S108–S113
  47. **Robertson RP, Harmon J, Tran PO, Tanaka Y, Takahashi H** 2003 Glucose toxicity in  $\beta$ -cells: type 2 diabetes, good radicals gone bad, and the glutathione connection. *Diabetes* 52:581–587
  48. **Harding HP, Ron D** 2002 Endoplasmic reticulum stress and the development of diabetes. A review. *Diabetes* 51(Suppl 3):S455–S461
  49. **Grill V, Bjorklund A** 2001 Overstimulation and  $\beta$ -cell function. *Diabetes* 50(Suppl 1):S122–S124
  50. **Maedler K, Sergeev P, Ris F, Oberholzer J, Joller-Jemelka HI, Sinas GA, Kaiser N, Halban PA, Donath MY** 2002 Glucose-induced  $\beta$ -cell production of IL-1 $\beta$  contributes to glucotoxicity in human pancreatic islets. *J Clin Invest* 110:851–860
  51. **Robertson RP, Harmon J, Tran PO, Poitout V** 2004  $\beta$ -Cell glucose toxicity, lipotoxicity, and chronic oxidative stress in type 2 diabetes. *Diabetes* 53(Suppl 1):S119–S124
  52. **Kaneto H, Xu G, Song KH, Suzuma K, Bonner-Weir S, Sharma A, Weir GC** 2001 Activation of the hexosamine pathway leads to deterioration of pancreatic  $\beta$ -cell function through the induction of oxidative stress. *J Biol Chem* 276:31099–31104
  53. **Del Guerra S, Lupi R, Marselli L, Masini M, Bugliani M, Sbrana S, Torri S, Polera M, Boggi U, Mosca F, Del Prato S, Marchetti P** 2005 Functional and molecular defects of pancreatic islets in human type 2 diabetes. *Diabetes* 54:727–735
  54. **Boden G** 1998 Free fatty acids (FFA), a link between obesity and insulin resistance. *Front Biosci* 4:d169–d175
  55. **Kashyap S, Belfort R, Castaldelli A, Pratipanawatr T, Berria R, Pratipanawatr W, Bajaj M, Mandarino L, DeFronzo R, Cusi K** 2003 A sustained increase in plasma free fatty acids impairs insulin secretion in nondiabetic subjects genetically predisposed to develop type 2 diabetes. *Diabetes* 52:2461–2474
  56. **Santomauro ATMG, Boden G, Silva ME, Rocha DM, Santos RF, Ursich MJ, Strassmann PG, Wajchenberg BL** 1999 Overnight lowering of free fatty acids with acipimox improves insulin resistance



- and glucose tolerance in obese diabetic and nondiabetic subjects. *Diabetes* 48:1836–1841
57. **Bajaj M, Suraamornkul S, Romanelli A, Cline GW, Mandarin LJ, Shulman GI, DeFronzo RA** 2005 Effect of sustained reduction in plasma free fatty acid concentration on intramuscular long-chain fatty acyl-CoAs and insulin action in type 2 diabetic patients. *Diabetes* 54:3148–3153
58. **Boden G, Shulman GI** 2002 Free fatty acids in obesity and type 2 diabetes: defining their role in the development of insulin resistance and  $\beta$ -cell dysfunction. *Eur J Clin Invest* 32(Suppl 3):14–23
59. **Shimabukuro M, Zhou YT, Levy M, Unger RH** 1998 Fatty acid-induced  $\beta$ -cell apoptosis: a link between obesity and diabetes. *Proc Natl Acad Sci USA* 95:2498–2502
60. **Maedler K, Oberholzer J, Bucher P, Spinas GA, Donath MY** 2003 Monounsaturated fatty acids prevent the deleterious effects of palmitate and high glucose on human pancreatic  $\beta$ -cell turnover and function. *Diabetes* 52:726–733
61. **Roehrich M-E, Mooser V, Lenain V, Herz J, Nimpf J, Azhar S, Bideau M, Capponi A, Nicod P, Haefliger J-A, Waeber G** 2003 Insulin-secreting  $\beta$ -cell dysfunction induced by human lipoproteins. *J Biol Chem* 278:18368–18375
62. **Prentki M, Corkey BE** 1996 Are the  $\beta$ -cell signaling molecules malonyl-CoA and cytosolic long-chain acyl-CoA implicated in multiple tissue defects of obesity and NIDDM? *Diabetes* 45:273–283
63. **Yaney GC, Corkey BE** 2003 Fatty acid metabolism and insulin secretion in pancreatic  $\beta$ -cells. *Diabetologia* 46:1297–1312
64. **Poitout V, Robertson RP** 2002 Minireview: secondary  $\beta$ -cell failure in type 2 diabetes—a convergence of glucotoxicity and lipotoxicity. *Endocrinology* 143:339–342
65. **Carlsson C, Borg LA, Welsh N** 1999 Sodium palmitate induces partial mitochondrial uncoupling and reactive oxygen species in rat pancreatic islets *in vitro*. *Endocrinology* 140:3422–3428
66. **Patane G, Piro S, Rabuazzo AM, Anello M, Vigneri R, Purrello F** 2000 Metformin restores insulin secretion altered by chronic exposure to free fatty acids or high glucose: a direct metformin effect on pancreatic  $\beta$ -cells. *Diabetes* 49:735–740
67. **Donath MY, Storling J, Maedler K, Mandrup-Poulsen T** 2003 Inflammatory mediators and islet  $\beta$ -cell failure: a link between type 1 and type 2 diabetes. *J Mol Med* 81:455–470
68. **Ronti T, Lupattelli G, Mannarino E** 2006 The endocrine function of adipose tissue: an update. *Clin Endocrinol (Oxf)* 64:355–365
69. **Otero M, Lago R, Lago F, Casanueva FF, Dieguez C, Gomez-Reino JJ, Gualillo O** 2005 Leptin, from fat to inflammation: old questions and new insights. *FEBS Lett* 479:295–301
70. **Maedler K, Sergeev P, Ehses JA, Mathe Z, Bosco D, Berney T, Dayer JM, Reinecke M, Halban PA, Donath MY** 2004 Leptin modulates  $\beta$ -cell expression of IL-1 receptor antagonist and release of IL-1  $\beta$  in human islets. *Proc Natl Acad Sci USA* 101:8138–8143
71. **Pickup JC** 2004 Inflammation and activated innate immunity in the pathogenesis of type 2 diabetes. *Diabetologia* 27:813–823
72. **Pietropaolo M, Barinas-Mitchell E, Pietropaolo SL, Kuller LH, Trucco M** 2000 Evidence of islet cell autoimmunity in elderly patients with type 2 diabetes. *Diabetes* 49:32–38
73. **Clark A, Nilsson MR** 2004 Islet amyloid: a complication of islet dysfunction or an aetiological factor in type 2 diabetes? *Diabetologia* 47:157–169
74. **Soeller WC, Janson J, Hart SE, Parker JC, Carty MD, Stevenson RW, Kreutter DK, Butler PC** 1998 Islet amyloid-associated diabetes in obese Avy/a mice expressing human islet amyloid polypeptide. *Diabetes* 47:743–750
75. **Butler AE, Janson J, Ritzel R, Sultana C, Soeller WC, Butler PC** 2002 Accelerated apoptosis overcomes increased replication to cause  $\beta$ -cell loss in diabetes in mice transgenic for h-IAPP. *Diabetes* 51(Suppl 2):Abstract 7
76. **Janson J, Ashley RH, Harrison D, McIntyre S, Butler PC** 1999 The mechanism of islet amyloid polypeptide toxicity is membrane disruption by intermediate-sized toxic amyloid particles. *Diabetes* 48:491–498
77. **Brunzell JD, Robertson RP, Lerner RL, Hazzard WR, Ensink JW, Bierman EL, Porte Jr D** 1976 Relationships between fasting plasma glucose levels and insulin secretion during intravenous glucose tolerance tests. *J Clin Endocrinol Metab* 42:222–229
78. **Kendall DM, Sutherland DW, Najjarian JS, Goetz FC, Robertson RP** 1990 Effects of hemipancnectomy on insulin secretion and glucose tolerance in healthy humans. *N Engl J Med* 322:898–903
79. **Bonner-Weir S, Trent DF, Weir GC** 1983 Partial pancreatectomy in the rat and subsequent defect in glucose-induced insulin release. *J Clin Invest* 71:1544–1553
80. **Weir GC, Leahy JL, Bonner-Weir S** 1986 Experimental reduction in B-cell mass: implications for the pathogenesis of diabetes. *Diabetes Metab Rev* 2:125–161
81. **Rachman J, Gribble FM, Barrow BA, Levy JC, Buchanan KD, Turner RC** 1996 Normalization of insulin responses to glucose by overnight infusion of glucagon-like peptide 1(7-36)amide in patients with NIDDM. *Diabetes* 45:1524–1530
82. **Ovalle F, Bell DSH** 2004 Effect of rosiglitazone versus insulin on the pancreatic  $\beta$ -cell function of subjects with type 2 diabetes. *Diabetes Care* 27:2585–2589
83. **Fehse FC, Trautmann ME, Holst JJ, Halseth AE, Nanayakkra N, Nielsen LL, Fineman MS, Kim DD, Nauck MA** 2005 Exenatide augments first and second phase insulin secretion in response to intravenous glucose in subjects with type 2 diabetes. *J Clin Endocrinol Metab* 90:5991–5997
84. **Ryan EA, Imes S, Wallace C** 2004 Short-term intensive insulin therapy in newly diagnosed type 2 diabetes. *Diabetes Care* 27:1028–1032
85. **Li Y, Xu W, Liao Z, Yao B, Chen X, Huang Z, Hu G, Weng JP** 2004 Induction of long-term glycemic control in newly diagnosed type 2 diabetic patients is associated with improvement of  $\beta$ -cell function. *Diabetes Care* 27:2597–2602
86. **Drucker DJ** 2003 Glucagon-like peptides: regulators of cell proliferation, differentiation and apoptosis. *Mol Endocrinol* 17:161–171
87. **Finegod DT, Dawn McArthur M, Kojwang D, Thomas MJ, Topp BG, Leonard T, Buckingham RE** 2001  $\beta$ -Cell mass dynamics in Zucker diabetic fatty rats. Rosiglitazone prevents the rise in net cell death. *Diabetes* 50:1021–1029
88. **Diani AR, Sawada G, Wyse B, Murray T, Khan M** 2004 Pioglitazone preserves pancreatic islet structure and insulin secretory function in three murine models of type 2 diabetes. *Am J Physiol Endocrinol Metab* 286:E116–E122
89. **Bell DSH** 2004 Management of type 2 diabetes with thiazolidinediones. Link between  $\beta$ -cell preservation and durability of response. *The Endocrinologist* 14:293–299
90. **Garvey WT, Olefsky JM, Griffin J, Hamman RF, Kolterman OG** 1985 The effect of insulin treatment on insulin secretion and insulin action in type II diabetes mellitus. *Diabetes* 34:222–234
91. **Glaser B, Leibovitz G, Nesher R, Hartling S, Binder C, Cerasi E** 1988 Improved  $\beta$ -cell function after intensive insulin treatment in severe non-insulin-dependent diabetes. *Acta Endocrinol* 118:365–373
92. **Yki-Järvinen H, Esko N, Eero H, Tashkinen M-R** 1988 Clinical benefits and mechanisms of a sustained response to intermittent insulin therapy in type 2 diabetic patients with secondary drug failure. *Am J Med* 84:185–192
93. **Gormley MJ, Hadden DR, Woods DR, Sheridan B, Andrews WJ** 1986 One month's insulin treatment of type II diabetes: the early and medium-term effects following insulin withdrawal. *Metabolism* 35:1029–1036
94. **Ilkova H, Glaser B, Tunckale A, Bagriacik N, Cerasi E** 1997 Induction of long-term control in newly diagnosed type 2 diabetic patients by transient intensive insulin treatment. *Diabetes Care* 20:1353–1356
95. **Ashcroft FM, Gribble EM** 1999 ATP-sensitive K<sup>+</sup> channels and insulin secretion: their role in health and disease. *Diabetologia* 42:903–919
96. **Greenwood RH, Mahler RF, Hales CN** 1976 Improvement in insulin secretion in diabetes after diazoxide. *Lancet* 1:444–447
97. **Leahy JL, Bumbalo LM, Chen C** 1994 Diazoxide causes recovery of  $\beta$ -cell glucose responsiveness in 90% pancreatectomized diabetic rats. *Diabetes* 43:173–179
98. **Matsuda M, Kawasaki F, Mikami Y, Takeuchi Y, Saito M, Eto M, Kaku K** 2002 Rescue of  $\beta$  exhaustion by diazoxide after the development of diabetes mellitus in rats with streptozotocin-induced diabetes. *Eur J Pharmacol* 453:141–148
99. **Björklund A, Lansner A, Grill VE** 2000 Glucose-induced [Ca<sup>2+</sup>]<sub>i</sub>

- abnormalities in human pancreatic islets. Important role of overstimulation. *Diabetes* 49:184–1848
100. Guldstrand M, Grill V, Björklund A, Lins PE, Adamson U 2002 Improved  $\beta$ -cell function after short-term treatment with diazoxide in obese subjects with type 2 diabetes. *Diabetes Metab (Paris)* 28: 448–450
  101. Teuscher AU, Kendall DM, Smets YFC, Leone JP, Sutherland DER 1998 Successful islet autotransplantation in humans: functional insulin secretory reserve as an estimate of surviving islet cell mass. *Diabetes* 47:324–330
  102. Björk E, Berne C, Kampe O, Wibell L, Oskarsson P, Karlsson FA 1996 Diazoxide treatment at onset preserved residual insulin secretion in adults with autoimmune diabetes. *Diabetes* 45:1427–1430
  103. Örtqvist E, Björk E, Wallensteen M, Ludvigsson J, Aman J, Johansson C, Forsander G, Lindgren F, Berglund L, Bengtsson M, Berne C, Persson B, Andres Karlsson F 2004 Temporary preservation of  $\beta$ -cell function by diazoxide treatment in childhood type 1 diabetes. *Diabetes* 27:2191–2197
  104. Iwakura T, Fujimoto S, Kagimoto S, Inada A, Kubota A, Someya Y, Ihara Y, Yamada Y, Seino Y 2000 Sustained enhancement of  $\text{Ca}(2+)$  influx by glibenclamide induces apoptosis in RINm5F cells. *Biochem Res Commun* 27: 422–428
  105. Maedler K, Carr RD, Bosco D, Zuellig RA, Berney T, Donath MY 2005 Sulphonylurea induced  $\beta$ -cell apoptosis in cultured human islets. *J Clin Endocrinol Metab* 90: 501–506
  106. Del Guerra S, Marselli L, Lupi R, Boggi U, Mosca F, Benzi L, Del Prato S, Marchetti P 2003 Effects on prolonged in vitro exposure to sulphonylureas on the function and survival of human islets. *J Diabetes Complications* 19:60–64
  107. Ritzel RA, Hansen JB, Veldhuis JD, Butler PC 2004 Induction of  $\beta$ -cell rest by a Kir 6.2/SUR 1 selective K ATP-channel opener preserves  $\beta$ -cell insulin stores and insulin secretion in human islets cultured in high (11 mM) glucose. *J Clin Endocrinol Metab* 89:795–805
  108. Alvarsson M, Sundkvist G, Lager I, Henricsson M, Berntorp K, Fernqvist-Forbes E, Steen L, Westermark G, Westermark P, Örn T, Grill W 2003 Beneficial effects of insulin versus sulphonylurea on insulin secretion and metabolic control in recently diagnosed type 2 diabetic patients. *Diabetes Care* 26:2231–2237
  109. Unger RH 1997 How obesity causes diabetes in Zucker diabetic fatty rats. *Trends Endocrinol Metab* 8:276–282
  110. Giardino I, Fard AK, Hatchell DL, Brownlee M 1998 Aminoguanidine inhibits reactive oxygen species formation, lipid peroxidation, and oxidant-induced apoptosis. *Diabetes* 47:1114–1120
  111. Shimabukuro M, Ohneda M, Lee Y, Unger RH 1997 Role of nitric oxide in obesity-induced  $\beta$ -cell disease. *J Clin Invest* 100:290–295
  112. Sing R, Barden A, Mori T, Beilin L 2001 Advanced glycation end-products: a review. *Diabetologia* 44:129–146
  113. Dubois M, Pattou F, Carr-Conte J, Gmyr V, Vanderwalle V, Desreumaux P, Auswers, Schoonjans K, Lefebvre J 2001 Expression of peroxisome proliferator-activated receptor  $\gamma$  (PPAR  $\gamma$ ) in normal human pancreatic islet cells. *Diabetologia* 43:1165–1169
  114. Way JM, Harrington WW, Brown KK, Gottschalk WK, Sundseth SS, Mansfield TA, Ramachandran RK, Wilson TM, Klierer SA 2001 Comprehensive messenger ribonucleic acid profiling reveals that peroxisome proliferator-activated receptor  $\gamma$  activation has coordinate effects on gene expression in multiple insulin-sensitive tissues. *Endocrinology* 142:1269–1277
  115. Yki-Järvinen H 2004 Thiazolidinediones. Review article. *N Engl J Med* 351:1106–1118
  116. Leiter LA 2005  $\beta$ -Cell preservation: a potential role for thiazolidinediones to improve clinical care in type 2 diabetes. *Diabet Med* 22:963–972
  117. Arner P 2001 Free fatty acids—do they play a central role in type 2 diabetes? *Diabetes Obes Metab* 3:S11–S19
  118. Sakamoto J, Kimura H, Moriyama S, Odaka H, Momose Y, Sugiyama Y, Sawada H 2000 Activation of human peroxisome proliferator-activated receptor (PPAR) subtypes by pioglitazone. *Biochem Biophys Res Commun* 278:704–711
  118. Staels B, Fruchart J-C 2005 Therapeutic roles of peroxisome proliferator-activated receptor agonists. *Diabetes* 54:2460–2470
  120. Shimabukuro M, Zhou YT, Lee Y, Unger RH 1998 Troglitazone lowers islet fat and restore  $\beta$ -cell function of Zucker diabetic fat rats. *J Biol Chem* 273:3547–3550
  121. Lister CA, Boam D, Bretherton-Watt D 1998 Rosiglitazone increases pancreatic islet area, number and insulin content, but not insulin gene expression. *Diabetologia* 41(Suppl 1):A-169 [Abstract]
  122. Diani AR, Sawada G, Wyse B, Murray FT, Khan M 2004 Pioglitazone preserved pancreatic islet structure and insulin secretory function in three murine models of type 2 diabetes. *Am J Physiol Endocrinol Metab* 286:E116–E122
  123. Maeda N, Takahashi M, Funahashi T, Kihara S, Nishizawa H, Kishida K, Nagaretani H, Matsuda M, Komuro R, Ouchi N, Kuriyama H, Hotta K, Nakamura T, Shimomura I, Matsuzawa Y 2001 PPAR $\gamma$  ligands increase expression and plasma concentrations of adiponectin, an adipose-derived protein. *Diabetes* 50:2094–2099
  124. Hull RL, Shen Z-P, Watts MR, Kodama K, Carr DB, Utzschneider, Zraika S, Wang FF, Kahn SE 2005 Long term treatment with rosiglitazone and metformin reduces the extent of, but does not prevent, islet amyloid deposition in mice expressing the gene for human islet amyloid polypeptide. *Diabetes* 54:2235–2244
  125. Lupi R, Del Guerra S, Marselli L, Bugliani M, Boggi U, Mosca F, Marchetti P, Del Prado S 2004 Rosiglitazone prevents the impairment of human islet function induced by fatty acids: evidence for a role of PPAR $\gamma$ 2 in the modulation of insulin secretion. *Am J Physiol Endocrinol Metab* 286:E560–E567
  126. Marselli L, Bambini MC, Lupi R, Del Guerra S, Boggi U, Mosca F, Del Prado S, Marchetti P 2002 Rosiglitazone partially prevents free fatty acid-induced cytotoxicity in human pancreatic islet cell. *Diabetologia* 45(Suppl 2):A161 [Abstract 494]
  127. Zeender E, Maedler K, Bosco D, Berney T, Donath MY, Halban PA 2004 Pioglitazone and sodium salicylate protect human  $\beta$ -cells against apoptosis and impaired function induced by glucose and interleukin-1 $\beta$ . *Diabetes* 89:5059–5066
  128. Lin C-Y, Gurlo T, Haataja L, Hsueh WA, Butler PC 2004 Peroxisome proliferator-activated receptor (PPAR- $\gamma$ ) activation protects human islets from human islet amyloid polypeptide-induced apoptosis. *Diabetes* 53(Suppl 2):A32 [Abstract 137-OR]
  129. Juhl CB, Hollingdal M, Porksen N, Prange A, Lönnqvist F, Smith O 2003 Influence of rosiglitazone treatment on  $\beta$ -cell function in type 2 diabetes: evidence of an increased ability of glucose to entrain high-frequency insulin pulsatility. *J Clin Endocrinol Metab* 88:3794–3800
  130. Lebovitz HE, Dole JF, Patwardhan R, Rappaport EB, Freed MI 2001 Rosiglitazone monotherapy is effective in patients with type 2 diabetes. *J Clin Endocrinol Metab* 86:280–288
  131. Wolfenbutter BH, Gomis R, Squatrito S, Jones NP, Patwardhan RN 2000 Addition of low-dose rosiglitazone to sulphonylurea therapy improves glycemic control in type 2 diabetic patients. *Diabet Med* 17:40–47
  132. Einhorn D, Rendell M, Rosenzweig J, Egan JW, Mathisen AL, Schneider RL 2000 Pioglitazone hydrochloride in combination with metformin in the treatment of type 2 diabetes: a randomized, placebo-controlled study. The Pioglitazone 027 Study Group. *Clin Ther* 22:1345–1409
  133. Jones TA, Sautter M, Van Gaal LF, Jones NP 2003 Addition of rosiglitazone to metformin is most effective in obese, insulin-resistant patients with type 2 diabetes. *Diabetes Obes Metab* 5:163–170
  134. Rosenblatt S, Miskin B, Glazer NB, Prince MJ, Robertson KE 2001 The impact of pioglitazone on glycemic control and atherogenic dyslipidemia in patients with type 2 diabetes mellitus. *Coron Artery Dis* 12:413–423
  135. Li J, Tian H, Ren Y, Yu H, Wang J, Zhang X, Zhao G 2003 Effect of pioglitazone on first phase insulin secretion in type 2 diabetes mellitus and impaired glucose tolerance. *Diabetes* 52(Suppl 1): A281 [Abstract 1212-P]
  136. Campbell JW 2004 Long-term glycemic controls with pioglitazone in patients with type 2 diabetes. *Int J Clin Pract* 58:192–200
  137. Bell DSH, Ovalle F 2002 Long-term efficacy of triple oral therapy for type 2 diabetes mellitus. *Endocr Pract* 8:271–275
  138. Bell DSH, Ovalle F, Five-year follow-up of triple oral therapy for type 2 diabetes mellitus. Program of the 85th Annual Meeting of



- The Endocrine Society, Philadelphia, PA, 2003, p 272 [Abstract P1–586]
139. **Zinman B** 2001 PPAR $\gamma$  agonists in type 2 diabetes: how far have we come in “preventing the inevitable”? A review of the metabolic effects of rosiglitazone. *Diabetes Obes Metab* 3(Suppl 1):S34–S43
  140. **Smith SA, Porter LE, Biswas N, Freed MI** 2005 Rosiglitazone, but not glyburide, reduces circulating proinsulin and the proinsulin: insulin ratio in type 2 diabetes. *J Clin Endocrinol Metab* 89:6048–6053
  141. **Wallace TM, Levy JC, Matthews DR** 2004 An increase in insulin sensitivity and basal  $\beta$ -cell function in diabetic subjects treated with pioglitazone in a placebo-controlled randomized study. *Diabet Med* 21:568–576
  142. **Walter H, Lübben G** 2005 Potential role of oral thiazolidinedione therapy in preserving  $\beta$ -cell function in type 2 diabetes mellitus. *Drugs* 65:1–13
  143. **Fonseca V, Rosenstock J, Patwardhan R, Salzman A** 2000 Effect of metformin and rosiglitazone combination therapy in patients with type 2 diabetes mellitus. A randomized controlled trial. *JAMA* 283:1695–1702
  144. **Miyazaki Y, Matsuda M, DeFronzo RA** 2002 Dose-response effect of pioglitazone on insulin sensitivity and insulin secretion in type 3 diabetes. *Diabetes Care* 25:517–523
  145. **Pfützner A, Langenfeld M, Butzer R, Hohberg C, Lübben G, Konrad T, Forst T** 2004 Influence of pioglitazone on insulin resistance,  $\beta$ -cell secretion, and cardiovascular risk markers in comparison to glimepiride in patients with type 2 diabetes. *Diabetes* 53(Suppl 2):A160 [Abstract 669-P]
  146. **Rasouli N, Miles L, Raue U, Lu T, Elbein SC, Kern PA** 2004 Pioglitazone (PIO) but not metformin (MET) improves lipotoxicity, insulin sensitivity, and  $\beta$ -cell function in subjects with impaired glucose tolerance (IGT). *Diabetes* 53(Suppl 2):A359 [Abstract 1492-P]
  147. **Vinik AI, Yu D, Strow LJ, Kravitz BG, Heise MA, Freed MI, O'Neill MC** 2004 Long-term effect of rosiglitazone on pancreatic  $\beta$ -cell function and insulin resistance in older type 2 diabetes mellitus (T2DM) patients treated with sulfonylurea. *Diabetes* 53(Suppl 2):A162 [Abstract 680-P]
  148. **Hamdy O, Soodini G, Martens J, Verheugt CA, Steppel J, Caballero AE, Bennani T, Horton ES** 2005 Pioglitazone preserves pancreatic  $\beta$ -cells in patients with type 2 diabetes and impaired glucose tolerance. *Diabetes* 54(Suppl 2):A146 [Abstract 592-P]
  149. **De Winter W, De Jongh J, Urquhart R, Moules I, Eckland D, Danhof M** 2005 Mechanistic disease progression analysis indicates that pioglitazone improves  $\beta$ -cell function in treatment-naïve type 2 diabetics. *Diabetes* 54(Suppl 2):A65 [Abstract 265-OR]
  150. **Ovalle F, Bell DSH** 2002 Clinical evidence that thiazolidinedione induced improvement of pancreatic  $\beta$ -cell function in patients with type 2 diabetes mellitus. *Diabetes Obes Metab* 4:56–59
  151. **Buchanan TA, Xiang AH, Peters RK, Kjos SL, Marroquin A, Goico J, Ochoa C, Tan S, Berkowitz K, Hodis HN, Azen SP** 2002 Preservation of pancreatic  $\beta$ -cell function and prevention of type 2 diabetes by pharmacological treatment of insulin resistance in high-risk Hispanic women. *Diabetes* 51:2796–2803
  152. **Xiang AH, Peters RK, Kjos SL, Marroquin A, Goico J, Ochoa C, Kawakubo M, Buchanan TA** 2006 Effect of pioglitazone on pancreatic  $\beta$ -cell function and diabetes risk in Hispanic women with prior gestational diabetes. *Diabetes* 55:517–522
  153. **The Diabetes Prevention Program Research Group** 2002 Reduction in the incidence of type 2 diabetes with lifestyle intervention or metformin. *N Engl J Med* 346:393–403
  154. **The Diabetes Prevention Program Research Group** 2005 Prevention of type 2 diabetes with troglitazone in the Diabetes Prevention Program. *Diabetes* 54:1150–1156
  155. **Durbin RJ** 2004 Thiazolidinedione therapy in the prevention/delay of type 2 diabetes in patients with impaired glucose tolerance and insulin resistance. *Diabetes Obes Metab* 6:280–285
  156. **Gerstein HC, Yusuf S, Bosch J, Pogue J, Sheridan P, Dinccag N, Hanefeld M, Hoogwerf B, Laakso M, Mohan V, Shaw J, Zinman B, Holman RR, on behalf of the DREAM trial investigators** 2006 Effect of rosiglitazone on the frequency of diabetes in patients with impaired glucose tolerance or impaired fasting glucose: a randomized controlled trial. *Lancet* 368:1096–1105
  157. **Drucker DJ** 2003 Enhancing incretin action for the treatment of type 2 diabetes. *Diabetes Care* 26:2928–2940
  158. **Hansen L, Holst JJ** 2005 The two intestinal incretins differentially regulate glucagon secretion due to differing intraislet paracrine effects. *Diabetologia* 48(Suppl 1):A-163
  159. **Turton MD, O'Shea D, Gunn I, Beak SA, Edwards CMB, Meeran K, Choi SJ, Taylor GM, Heath MM, Lambert PD, Wilding JPH, Smith DM, Ghatei MA, Herbert J, Bloom SR** 1996 A role of glucagon-like peptide-1 in the central regulation of feeding. *Nature* 379:69–72
  160. **Drucker DJ** 2003 Glucagon-like peptide-1 and the islet  $\beta$ -cell: augmentation of cell proliferation and inhibition of apoptosis. *Endocrinology* 144:5145–5148
  161. **Hansotia T, Drucker DJ** 2005 GIP and GLP-1 as incretin hormones: lessons from single and double incretin receptor knockout mice. *Regul Pept* 128:125–134
  162. **Brubaker PL, Drucker DJ** 2002 Structure-function of the glucagon receptor family of G protein-coupled receptors: the glucagon, GIP, GLP-1 and GLP-2 receptors. *Receptors Channels* 8:179–188
  163. **Deacon CF** 2004 Circulation and degradation of GIP and GLP-1. *Horm Metab Res* 36:761–765
  164. **Vahl TP, Paty BW, Fuller BD, Prigeon RL, D'Alessio DA** 2003 Effects of GLP-1-(7-36)NH<sub>2</sub>, GLP-1-(7-37), and GLP-1-(9-36)NH<sub>2</sub> on intravenous glucose tolerance and glucose-induced insulin secretion in healthy humans. *J Clin Endocrinol Metab* 88:1772–1779
  165. **Elahi D, Egan JM, Shannon RP, Meneilly GS, Khatri A, Habener JF, Andersen DK** 2006 The insulinomimetic actions of GLP-1-(9-36)amide, cleavage product of GLP-1-(7-36)amide. *Diabetes* 55(Suppl 1):A85 [Abstract 363-OR]
  166. **DeFronzo R, Ratner R, Han J, Kim DD, Fineman MS, Baron AD** 2005 Effects of exenatide (Exendin-4) on glycemic control and weight over 30 weeks in metformin-treated patients with type 2 diabetes. *Diabetes Care* 28:1092–1300
  167. **Buse JB, Henry RR, Han J, Kim DD, Fineman MS, Baron AD, Exenatide-113 Clinical Study Group** 2004 Effects of exenatide (Exendin-4) on glycemic control over 30 weeks in sulfonylurea-treated patients with type 2 diabetes. *Diabetes Care* 27:2628–2635
  168. **Kendall DM, Riddle MC, Rosenstock J, Zhuang D, Kim DD, Fineman MS, Baron AD** 2005 Effects of exenatide (Exendin-4) on glycemic control over 30 weeks in patients with type 2 diabetes treated with metformin and a sulfonylurea. *Diabetes Care* 28:1083–1091
  169. **Toft-Nielsen M-B, Damholt MB, Madsbad S, Hilsted LM, Hughes TE, Michelsen BK, Holst JJ** 2001 Determinants of the impaired secretion of glucagon-like peptide-1 in type 2 diabetic patients. *J Clin Endocrinol Metab* 86:3717–3723
  170. **Meyer JJ, Gallwitz B, Kask B, Deacon CF, Holst JJ, Schmidt WE, Nauck MA** 2004 Stimulation of insulin secretion by intravenous bolus injection and continuous infusion of gastric inhibitory polypeptide in patients with type 2 diabetes and healthy control subjects. *Diabetes* 53(Suppl 3):S220–S224
  171. **Lynn FC, Pamir N, Ng EH, McIntosh CH, Kieffer TJ, Pederson RA** 2001 Defective glucose-dependent insulinotropic polypeptide receptor expression in diabetic fatty Zucker rats. *Diabetes* 50:1004–1011
  172. **Tseng CC, Boylan MO, Jarboe LA, Usdin TB, Wolfe MM** 1996 Chronic desensitization of the glucose-dependent insulinotropic polypeptide receptor in diabetic rats. *Am J Physiol* 270:E661–E666
  173. **El-Quahli A, Holle H, Nauck NA** 2005 Tachyphylaxis is not the cause for reduced insulinotropic action of gastric inhibitory polypeptide (GIP) in type 2 diabetes. *Diabetologia* 48(Suppl 1):A-547
  174. **Miholic J, Orskov O, Holst JJ, Kotzerke J, Meyer HJ** 1991 Emptying of the gastric substitute, glucagon-like peptide-1 (GLP-1), and reactive hypoglycemia after total gastrectomy. *Dig Dis Sci* 36:1361–1370
  175. **Qualmann C, Nauck MA, Holst JJ, Orskov O, Creutzfeldt W** 1995 Glucagon-like peptide 1(7-36 amide) secretion in response to luminal sucrose from upper and lower gut. A study using  $\alpha$ -glucosidase inhibition. *Scand J Gastroenterol* 30:892–896
  176. **Creutzfeldt WO, Kleine N, Wilms B, Orskov C, Holst JJ, Nauck MA** 1996 Glucagonostatic actions and reduction of fasting hyper-



- glycemia by exogenous glucagon-like peptide 1 (7-36) amide in type 1 diabetic patients. *Diabetes Care* 19:580–586
177. Dupré J 2005 Glycaemic effects of incretins in type 1 diabetes mellitus. A concise review, with emphasis on studies in humans. *Regul Pept* 128:149–157
  178. Dupré J, Behme MT, McDonald TJ 2004 Exendin-4 normalized post cibal glycemic excursions in type 1 diabetes. *J Clin Endocrinol Metab* 89:3469–3473
  179. Jones-Leone A, Yu T, Barilla D, He L-Y, Ho YY, Ligueros-Saylan M, Foley J, Kelly D 2004 Evidence for insulin independent suppression of glucagon secretion by LAF237. *Diabetologia* 47(Suppl 1):A289
  180. Quddusi S, Vahl TP, Hanson K, Prigeon RL, D'Alessio DA 2003 Differential effects of acute and extended infusions of glucagon-like peptide-1 on first- and second-phase insulin secretion in diabetic and non-diabetic humans. *Diabetes Care* 26:791–798
  181. Byrne MM, Gliem K, Wank U, Arnold R, Katschinski M, Polonsky KS, Göcke B 1998 Glucagon-like peptide 1 improves the ability of the  $\beta$ -cell to sense and respond to glucose in subjects with impaired glucose tolerance. *Diabetes* 47:1259–1265
  182. Service FJ, Thompson GB, Service FJ, Andrews JC, Collazo-Clavell ML, Lloyd RV 2005 Hyperinsulinemic hypoglycemia with nesidioblastosis after gastric bypass surgery. *N Engl J Med* 353:249–254
  183. Farilla L, Hui H, Bertolotto C, Kang E, Bulotta A, Di Mario U, Perfetti R 2002 Glucagon-like peptide-1 promotes islet cell growth and inhibits apoptosis in Zucker diabetic rats. *Endocrinology* 143:4397–4408
  184. Hui H, Nourparvar A, Zhao X, Perfetti R 2003 Glucagon-like peptide-1 inhibits apoptosis of insulin-secreting cells via a cyclic 5'-adenosine monophosphate-dependent protein-kinase-A and a phosphatidylinositol 3-kinase-dependent pathway. *Endocrinology* 144:1444–1455
  185. Xu G, Stoffers DA, Habener JF, Bonner-Weir S 1999 Exendin-4 stimulates both  $\beta$ -cell replication and neogenesis, resulting in increased  $\beta$ -cell mass and improved glucose tolerance in diabetic rats. *Diabetes* 48:2270–2276
  186. Perfetti R, Zhou J, Doyle ME, Egan JM 2000 GLP-1 induces cell proliferation, PDX-1 expression and increases endocrine cell mass in the pancreas of old, glucose-intolerant rats. *Endocrinology* 141:4600–4605
  187. Perfetti R 2004 The role of GLP-1 in the regulation of islet cell mass. *Medscape Diabetes Endocrinol* 6(2)
  188. Hiles R, Carpenter T, Serota D, Schafer K, Ross P, Nelson D, Rebellato M 2004 Exenatide does not cause pancreatic islet cell proliferative lesions in rats and mice following 2-year exposure. *Diabetes* 53 (Suppl 2):A380 [Abstract 1585-P]
  189. Bahnsali A, GLP-1 overview. *Proc International Investigator's Meeting of the Clinical Study NN 2211-1697(Liraglutide)*, Zurich, Switzerland, April 21, 2006
  190. Li Y, Hansotia Y, Yusta B, Ris F, Halban PA, Drucker DJ 2003 Glucagon-like peptide-1 receptor signaling modulates  $\beta$ -cell apoptosis. *J Biol Chem* 278:471–478
  191. Koehler JA, Drucker DJ 2006 Activation of glucagon-like peptide-1 receptor signaling does not modify the growth or apoptosis of human pancreatic cancer cells. *Diabetes* 55:1369–1379
  192. Poffenberger G, Chen Z, Liu E, Drucker DJ, Harlan DM, Aramandla R, Brissova M, Powers AC 2006 Exendin-4 (Ex-4) improves survival and function of intra-hepatic human and non-human primate islet transplants. *Diabetes* 55(Suppl 1):A61 [Abstract 262-OR]
  193. Sturis J, Gotfredsen CF, Romer J, Rolin B, Ribel U, Brand CL, Wilken M, Wassermann K, Deacon CF, Carr RD, Knudsen LB 2003 GLP-1 derivative liraglutide in rats with  $\beta$ -cell deficiencies: influence of metabolic state on  $\beta$ -cell dynamics. *Br J Pharmacol* 140:123–132
  194. Bregenholt S, Moldrup A, Blume N, Karlens AE, Nissen Friedrichsen B, Tornhave D, Knudsen LB, Petersen JS 2005 The long-acting glucagon-like peptide-1 analogue, liraglutide, inhibits  $\beta$ -cell apoptosis in vitro. *Biochem Biophys Res Commun* 330:577–584
  195. Farilla L, Bulotta A, Hirshberg B, Calzi SL, Khoury N, Noshmehr H, Bertolotto C, Di Mario U, Harlan DM, Perfetti R 2003 Glucagon-like peptide 1 inhibits cell apoptosis and improves glucose responsiveness of freshly isolated human islets. *Endocrinology* 144:5149–5158
  196. Buteau J, El-Assaad W, Rhodes CJ, Rosenberg L, Joly E, Prentki M 2004 Glucagon-like peptide-1 prevents  $\beta$ -cell glucolipotoxicity. *Diabetologia* 47:806–815
  197. Hui H, Zhao X, Khoury N, Todorov I, Zhong J, Lin J, Wang C, Perfetti R 2005 The biological action of the GLP-1 analogue liraglutide is mediated by the activation of the TGF- $\beta$  pathway in cultured human islets. *Diabetologia* 48(Suppl 1):A-165
  198. Baggio LL, Drucker DJ 2006 Incretin hormones in the treatment of type 2 diabetes: therapeutic applications of DPP-IV inhibitors. *Medscape Diabetes Endocrinol* 8:1–5
  199. Burcelin R, Da Costa A, Drucker DJ, Thorens B 2001 Glucose competence of the hepatoportal vein sensor requires the presence of an activated glucagon-like peptide-1 receptor. *Diabetes* 50:1720–1728
  200. Wajchenberg E, Triplitt C, Sriwijitkamol A, DeFronzo RA, Cerosimo E 2006 Contribution of glucagon suppression to improved postprandial hyperglycemia induced by exenatide in patients with T2DM. *Diabetes* 55 (Suppl 1):A28 [Abstract 118-OR]
  201. Mari A, Halseth A, Nanayakkara N, Nielsen L, DeFronzo R, Ferrannini E 2005 Mathematical modeling shows exenatide improved postprandial  $\beta$ -cell function in patients with type 2 diabetes treated with metformin or metformin and sulfonylurea. *Diabetes* 54(Suppl 1):A119 [Abstract 482-P]
  202. Mari A, Schmitz O, Gastaldelli A, Oestergaard T, Nyholm B, Ferrannini E 2002 Meal and oral glucose tests for assessment of  $\beta$ -cell function: modeling analysis in normal subjects. *Am J Physiol Endocrinol Metab* 283:E1159–E1166
  203. Ferrannini E, Gastaldelli A, Miyazaki Y, Matsuda M, Mari A, DeFronzo RA 2005  $\beta$ -Cell function in subjects spanning the range from normal glucose tolerance to overt diabetes: a new analysis. *J Clin Endocrinol Metab* 90:493–500
  204. Deacon CF 2004 Therapeutic strategies based upon glucagon-like peptide 1. *Diabetes* 53:2181–2189
  205. Juhl CB, Hollingdal M, Sturis J, Jakobsen G, Agero H, Veldhuis J, Porsen N, Schmitz O 2002 Bedtime administration of NN2211, a long-acting GLP-1 derivative, substantially reduces fasting and postprandial glycemia in type 2 diabetes. *Diabetes* 51:424–429
  206. Visboll T, Agero H, Krarup T, Holst JJ 2003 Similar elimination rates of glucagon-like peptide-1 in obese type 2 diabetic patients and healthy subjects. *J Clin Endocrinol Metab* 88:220–224
  207. Chang AM, Jakobsen G, Sturis J, Smith MJ, Bloem CJ, An B, Galecki A, Halter JB 2003 The GLP-1 derivative NN2211 restores  $\beta$ -cell sensitivity to glucose in type 2 diabetic patients after a single dose. *Diabetes* 52:1786–1791
  208. Degn KB, Juhl CB, Sturis J, Jakobsen G, Brock B, Chandramouli V, Rungny J, Landau BR, Schmitz O 2004 One week's treatment with long-acting glucagon-like peptide 1 derivative liraglutide (NN2211) markedly improves 24-h glycemia and  $\alpha$ - and  $\beta$ -cell function and reduces endogenous glucose release in patients with type 2 diabetes. *Diabetes* 53:1187–1194
  209. Visboll T, Zdravkovic M, Le-Thi T, Krarup T, Schmitz O, Courreges J, Verhoeven R, Buganova I, Madsbad S 2006 Liraglutide significantly improves glycemic control and lowers body weight without risk of either major or minor hypoglycemic episodes in subjects with type 2 diabetes. *Diabetes* 55(Suppl 1):A27 [Abstract 115-OR]
  210. Mari A, Degn K, Brock B, Rungby J, Ferrannini E, Schmitz O 2006 Characterization of  $\beta$ -cell function improvement by liraglutide: modeling analysis of 24-h tests. *Diabetes* 55(Suppl 1):A124 [Abstract 522P]
  211. Hui H, Wang C, Xu J, Hui J, Perfetti R 2006 Liraglutide inhibits cell death in human isolated islets by regulating the expression of apoptosis-related genes. *Diabetes* 55(Suppl 1):A446 (Abstract 133-P)
  212. Nauck MA, GLP-1 receptor as a clinical drug target for diabetes and obesity treatment. GLP-1: The new darling of diabetes treatment. *Proc of the 66th Scientific Session of the American Diabetes Association*, Washington, DC, June 11, 2006
  213. Mentlein R 1999 Dipeptidyl-peptidase IV (CD26): role in the inactivation of regulatory peptides. *Regul Pept* 85:9–24

214. **Ahrén B** 2005 What mediates the benefits associated with dipeptidyl peptidase-IV inhibition? *Diabetologia* 48:605–607
215. **Ahrén B, Gomis R, Standl E, Mills D, Schweizer A** 2004 Twelve- and 52-week efficacy of the dipeptidyl peptidase IV inhibitor LAF237 in metformin-treated patients with type 2 diabetes. *Diabetes Care* 27:2874–2880
216. **Nauck MA, Heimesaat MM, Orskov C, Holst JJ, Ebnert R, Creutzfeldt W** 1993 Preserved incretin activity of glucagon-like peptide 1 [7-36 amide] but not synthetic human inhibitory polypeptide in patients with type 2-diabetes mellitus. *J Clin Invest* 91:301–307
217. **Ahrén B** 2004 Sensory nerves contribute to insulin secretion by glucagon-like peptide-1 (GLP-1) in mice. *Am J Physiol Regul Integr Comp Physiol* 286:R269–R272
218. **Nauck MA, El-Ouaghlidi A** 2005 The therapeutic actions of DPP-IV inhibition are not mediated by glucagon-like peptide-1. *Diabetologia* 48:608–611
219. **Ahrén B, Simonsson E, Larsson H, Landin-Olsson M, Torgeirsson H, Jansson PA, Sandqvist M, Bavenholm P, Efendic S, Eriksson JW, Dickinson S, Holmes D** 2002 Inhibition of dipeptidyl peptidase IV improves metabolic control over a 4-week study period in type 2 diabetes. *Diabetes Care* 25:869–875
220. **Ahrén B, Landin-Olsson M, Jansson PA, Svensson M, Holmes D, Schweizer A** 2004 Inhibition of dipeptidyl peptidase-4 reduces glycemia, sustains insulin levels, and reduces glucagon levels in type 2 diabetes. *J Clin Endocrinol Metab* 89:2078–2084
221. **Holst JJ, Deacon CF** 2005 Glucagon-like peptide-1 mediates the therapeutic actions of DPP-IV inhibitors. *Diabetologia* 48:612–615
222. **Drucker DJ** 2006 DPP-4 inhibitors in the management of type 2 diabetes (slide presentation). *Mechanisms in Medicine Inc.*; 59
223. **Ahrén B** 2000 Autonomic regulation of islet hormone secretion: implications for health and disease. *Diabetologia* 43:393–410
224. **Filipsson K, Kvist Reimer M, Ahrén B** 2001 The neuropeptide pituitary adenylate cyclase-activating polypeptide and islet function. *Diabetes* 53:1959–1969
225. **Ahrén B, Hughes TE** 2005 Inhibition of DPP-IV augments insulin secretion in response to exogenously administered glucagon-like peptide-1, glucose-dependent insulinotropic polypeptide, pituitary adenylate cyclase-activating polypeptide, and gastrin-releasing peptide in mice. *Endocrinology* 146:2025–2029
226. **Mest H-J, Mentlein R** 2005 Dipeptidyl peptidase inhibitors as new drugs for the treatment of type 2 diabetes. *Diabetologia* 48:616–620
227. **Mu J, Woods J, Zhou Y-P, Roy RS, Li Z, Zycband E, Feng Y, Zhu L, Li C, Howard AD, Moller DE, Thornberry NA, Zhang BB** 2006 Chronic inhibition of dipeptidyl peptidase-4 with a sitagliptin analog preserves pancreatic  $\beta$ -cell mass and function in a rodent model of type 2 diabetes. *Diabetes* 55:1695–1704
228. **Herman GA, Stevens C, Van Dyck K, Bergman A, Yi B, De Smet M, Snyder K, Hilliard D, Tanen M, Tanaka W, Wang AQ, Zeng W, Musson D, Winchell G, Davies MJ, Ramael S, Gottesdiener KM, Wagner JA** 2005 Pharmacokinetics and pharmacodynamics of sitagliptin, an inhibitor of dipeptidyl peptidase IV, in healthy subjects: results from two-randomized, double-blind, placebo-controlled studies with single oral doses. *Clin Pharmacol Ther* 78:675–688
229. **Herman GA, Zhao P-L, Dietrich B, Golor G, Schrodter A, Keymeulen B, Lasseter KC, Kipnes MS, Hilliard D, Tanen M, De Lepeleire I, Cilissen C, Stevens C, Tanaka W, Gottesdiener KM, Wagner JA** 2004 The DP-4 inhibitor MK-0431 enhances active GLP-1 and reduces glucose following an OGTT in type 2 diabetes. *Diabetes* 53(Suppl 2):A82 [Abstract 353-OR]
230. **Aschner P, Kipnes M, Luncford J, Mickel C, Davies M, Williams-Herman D** 2006 Sitagliptin monotherapy improved glycemic control in the fasting and postprandial states and  $\beta$ -cell function after 24 weeks in patients with type 2 diabetes (T2DM). *Diabetes* 55(Suppl 1):A462 [Abstract 1995-PO]
231. **Karasik A, Charbonnel B, Liu J, Wu M, Meehan A, Meininger G** 2006 Sitagliptin added to ongoing metformin therapy enhanced glycemic control and  $\beta$ -cell function in patients with type 2 diabetes. *Diabetes* 55(Suppl 1):A119 [Abstract 501-P]
232. **Xu L, Dalla Man C, Cobelli C, Williams-Herman D, Meininger G, Khatami H, Stein P** 2006 Sitagliptin improved  $\beta$ -cell function in patients with type 2 diabetes (T2DM): a model-based analysis. *Diabetes* 55(Suppl 1):A466 [Abstract 2014-PO]
233. **Rosenstock J, Brazg R, Andryuk PJ, Sisk CM, Lu K, Stein P** 2006 Addition of sitagliptin to pioglitazone improved glycemic control with neutral weight effect over 24 weeks in inadequately controlled type 2 diabetes (T2DM). *Diabetes* 55(Suppl 1):A132 [Abstract 556-P]
234. **Duttaroy A, Voelker F, Merriam LQ, Zhang X, Ren X, Burkey B** 2005 The DPP-4 inhibitor Vildagliptin increases pancreatic  $\beta$ -cell neogenesis and decreases apoptosis. *Diabetes* 54(Suppl 1):A141 [Abstract 572-P]
235. **Duttaroy A, Voelker F, Ren X, Zhang X, Merriam LQ, Chen H, Burkey B** 2005 Head-to-head comparison of the DPP-4 inhibitor Vildagliptin with exendin-4 in a model of pancreatic  $\beta$ -cell injury. *Diabetes* 54(Suppl 1):A66 [Abstract 267-OR]
236. **Mari A, Sallas WM, He YL, Watson C, Ligueros-Saylan M, Dunning BE, Deacon CF, Holst JJ, Foley JE** 2005 Vildagliptin, a dipeptidyl peptidase-IV inhibitor, improves model-assessed  $\beta$ -cell function in patients with type 2 diabetes. *J Clin Endocrinol Metab* 90:4888–4894
237. **Ahrén B, Pacini G, Foley JE, Schweizer A** 2005 Improved meal-related  $\beta$ -cell function and insulin sensitivity by dipeptidyl peptidase-IV inhibitor vildagliptin in metformin-treated patients with type 2 diabetes over 1 year. *Diabetes Care* 28:1936–1940
238. **Mari A, Pacini G, Murphy E, Ludvik B, Nolan JJ** 2001 A model-based method for assessing insulin sensitivity from oral glucose tolerance test. *Diabetes Care* 24:539–548
239. **Ahrén B, Pacini G** 1997 Impaired adaptation of first-phase insulin secretion in postmenopausal women with glucose intolerance. *Am J Physiol* 273:E701–E707
240. **El-Quaghlidi A, Rehling E, Schweizer A, Holmes D, Nauck M** 2003 The dipeptidyl peptidase IV inhibitor IV LAF 237 does not accentuate reactive hypoglycemia caused by the sulfonylurea glibenclamide administered before an oral glucose load in healthy subjects. *Diabetes* 52(Suppl 1):A118 [Abstract 507-P]
241. **He Y-L, Holst JJ, Deacon CF, Dunning BE, Ligueros-Saylan M, Foley JE** 2006 The insulinotropic effect of vildagliptin is revealed when oral glucose tolerance tests (OGTT) impose large glucose loads. *Diabetes* 55(Suppl 1):A115 [Abstract 483-P]
242. **Balas B, Baig M, Watson C, Dunning BE, Ligueros-Saylan M, He L-Y, Wang Y, Cusi K, Foley JE, DeFronzo RA** 2006 Vildagliptin suppresses endogenous glucose production (EGP) and increases the  $\beta$ -cell function after single dose administration in type 2 diabetic (T2D) patients. *Diabetes* 55(Suppl 1):A29 [Abstract 122-OR]
243. **D'Alessio DA, Watson CE, He Y-L, Ligueros-Saylan M, Wang Y, Dunning BE, Prigeon RL, Foley JE, Pratley RE** 2006 Restoration of an acute insulin response to glucose (AIR<sub>g</sub>) in drug-naïve patients with type 2 diabetes (TM2D) by 3-month treatment with vildagliptin. *Diabetes* 55(Suppl 1):A108 [Abstract 454-P]
244. **Dejager S, Lebeaut A, Couturier A, Schweizer A** 2006 Sustained reduction in HbA1c during one-year treatment with vildagliptin in patients with type 2 diabetes (T2DM). *Diabetes* 55(Suppl 1):A29 [Abstract 120-OR]
245. **Garber A, Camisasca RP, Ehram E, Collober-Maugeais C, Rochotte E, Lebeaut A** 2006 Vildagliptin added to metformin improves glycemic control and may mitigate metformin-induced GI side effects in patients with type 2 diabetes (T2DM). *Diabetes* 55(Suppl 1):A29 [Abstract 121-OR]
246. **Fonseca V, Dejager S, Albrecht D, Shirt L, Schweizer A** 2006 Vildagliptin as add-on to insulin in patients with type 2 diabetes (T2DM). *Diabetes* 55(Suppl 1):A111 [Abstract 467-P]
247. **Deacon CF** 2006 MK-431 (Merck). *Curr Opin Investig Drugs* 6:419–426
248. **Lankas GR, Leiting B, Roy RS, Eiermann GJ, Beconi MG, Biftu T, Chan C-C, Edmondson S, Feeney WP, He H, Ippolito DE, Kim D, Lyons KA, Ok HO, Patel RA, Petrov AN, Pryor KA, Qian X, Reigle L, Woods A, Wu JK, Zaller D, Zhang X, Zhu L, Weber AE, Thornberry NA** 2005 Dipeptidyl peptidase IV inhibition for the treatment of type 2 diabetes. Potential importance of selectivity over dipeptidyl peptidases 8 and 9. *Diabetes* 54:2988–2994
249. **Egan JM, Bulotta A, Hui H, Perfetti R** 2003 GLP-1 receptor agonists are growth and differentiation factors for pancreatic islet  $\beta$ -cells. *Diabetes Metab Res Rev* 19:115–123
250. **Stoffers DA, Kieffer TJ, Hussain MA, Drucker DJ, Bonner-Weir**

- S, Habener JF, Egan JM** 2000 Insulinotropic glucagon-like peptide 1 agonists stimulate expression of homeodomain protein IDX-1 and increase islet size in mouse diabetes. *Diabetes* 49:741–748
251. **Zhou J, Wang S, Pineyro MA, Egan JM** 1999 Glucagon-like peptide 1 and exendin-4 convert pancreatic AR42J cells into glucagon- and insulin-producing cells. *Diabetes* 48:2358–2366
252. **Holst JJ** 2006 Glucagon-like peptide-1: from extract to agent. The Claude Bernard Lecture, 2005. *Diabetologia* 49:233–260
253. **Blonde L, Klein EJ, Han J, Zhang B, Mac SM, Poon TH, Taylor KL, Trautmann ME, Kim DD, Kendall DM** 2006 Interim analysis of the effects of exenatide treatment on A1c, weight and cardiovascular risk factors over 82 weeks in 314 overweight patients with type 2 diabetes. *Diabetes Obes Metab* 8:436–447
254. **Nielsen JH, Galsgaard ED, Moldrup A, Friedrichsen BN, Billestrup N, Hansen JA, Lee YC, Carlsson C** 2001 Regulation of  $\beta$ -cell mass by hormones and growth factors. *Diabetes* 50(Suppl 1):S25–S29
255. **Unger RH, Orci L** 1975 The essential role of glucagon in the pathogenesis of diabetes mellitus. *Lancet* 1:14–16
256. **Dunning BE, Foley JE, Ahrén B** 2005  $\alpha$ -Cell function in health and disease: influence of glucagon-like peptide-1. *Diabetologia* 48:1700–1713
257. **Ahrén B, Larsson H, Holst JJ** 1997 Effects of glucagon-like peptide-1 on islet function and insulin sensitivity in noninsulin-dependent diabetes mellitus. *J Clin Endocrinol Metab* 82:473–478
258. **Patti ME, McMahon G, Mun EC, Bitton A, Holst JJ, Goldsmith J, Hanto DW, Callery M, Arky R, Nose V, Bonner-Weir S, Goldfine AB** 2005 Severe hypoglycemia post-gastric bypass requiring partial pancreatectomy: evidence for inappropriate insulin secretion and pancreatic islet hyperplasia. *Diabetologia* 48:2236–2240

*Endocrine Reviews* is published by The Endocrine Society (<http://www.endo-society.org>), the foremost professional society serving the endocrine community.
